# Supplementary material for: Optimizing sample and spike concentrations for isotopic analysis by double-spike ICPMS
Source: Royal Society of Chemistry journal article supplement (doi:10.1039/c2ja30215b), 2012-01-01

| [Sample] (V) | [Spike] (V) | Error |
|--------------|-------------|-------|
| 1            | 10          | 0.056 |
| 2            | 10          | 0.035 |
| 3            | 10          | 0.027 |
| 4            | 10          | 0.023 |
| 5            | 10          | 0.021 |
| 6            | 10          | 0.019 |
| 7            | 10          | 0.018 |
| 8            | 10          | 0.017 |
| 9            | 10          | 0.016 |
| 10           | 10          | 0.016 |
| 11           | 10          | 0.015 |
| 12           | 10          | 0.015 |
| 13           | 10          | 0.015 |
| 14           | 10          | 0.015 |
| 15           | 10          | 0.014 |
| 16           | 10          | 0.014 |
| 17           | 10          | 0.014 |
| 18           | 10          | 0.014 |
| 19           | 10          | 0.014 |
| 20           | 10          | 0.013 |

Enter isotope name:

Enter isotopic mass:

Sample isotopic composition:

Spike isotopic composition:

| <u>Isotope A</u> | <u>Isotope B</u> | <u>Isotope C</u> |
|------------------|------------------|------------------|
| Fe54             | Fe56             | Fe57             |
| 53.9396148       | 55.9349421       | 56.9353987       |
| 0.0557           | 0.9195           | 0.0218           |
| 0.0000           | 0.0065           | 0.4772           |

Total voltage:

| [Sample] (V) | [Spike] (V) |                 |
|--------------|-------------|-----------------|
| 20           | 10          | This is the tot |

Analytical time (s):

240

Predicted error in  $\delta^{B/A}$  (permil,  $1\sigma$ ):

0.01351

Predicted inaccuracy in  $\delta^{B/A}$  (permil,  $1\sigma$ ):

0.00008

|                     | <u>Isotope A</u> | <u>Isotope B</u> | <u>Isotope C</u> |
|---------------------|------------------|------------------|------------------|
| Sample true voltage | 1.11             | 18.39            | 0.44             |
| Spike true voltage  | 0.00             | 0.07             | 4.77             |

|                                |          |          |          |
|--------------------------------|----------|----------|----------|
| Mixture true voltage           | 1.11     | 18.46    | 5.21     |
| Johnson Noise error            | 2.38E-06 | 2.38E-06 | 2.38E-06 |
| Counting stats error           | 8.62E-06 | 3.51E-05 | 1.86E-05 |
| Isobaric interference error    | 0.00E+00 | 0.00E+00 | 0.00E+00 |
| Total stochastic error         | 8.94E-06 | 3.52E-05 | 1.88E-05 |
| Constant isobaric interference | 0.00E+00 | 0.00E+00 | 0.00E+00 |
| Simulated analysis #1          | 1.11E+00 | 1.85E+01 | 5.21E+00 |
| Simulated analysis #2          | 1.11E+00 | 1.85E+01 | 5.21E+00 |
| Simulated analysis #3          | 1.11E+00 | 1.85E+01 | 5.21E+00 |
| Simulated analysis #4          | 1.11E+00 | 1.85E+01 | 5.21E+00 |
| Simulated analysis #5          | 1.11E+00 | 1.85E+01 | 5.21E+00 |
| Simulated analysis #6          | 1.11E+00 | 1.85E+01 | 5.21E+00 |
| Simulated analysis #7          | 1.11E+00 | 1.85E+01 | 5.21E+00 |
| Simulated analysis #8          | 1.11E+00 | 1.85E+01 | 5.21E+00 |
| Simulated analysis #9          | 1.11E+00 | 1.85E+01 | 5.21E+00 |
| Simulated analysis #10         | 1.11E+00 | 1.85E+01 | 5.21E+00 |
| Simulated analysis #11         | 1.11E+00 | 1.85E+01 | 5.21E+00 |
| Simulated analysis #12         | 1.11E+00 | 1.85E+01 | 5.21E+00 |
| Simulated analysis #13         | 1.11E+00 | 1.85E+01 | 5.21E+00 |
| Simulated analysis #14         | 1.11E+00 | 1.85E+01 | 5.21E+00 |
| Simulated analysis #15         | 1.11E+00 | 1.85E+01 | 5.21E+00 |
| Simulated analysis #16         | 1.11E+00 | 1.85E+01 | 5.21E+00 |
| Simulated analysis #17         | 1.11E+00 | 1.85E+01 | 5.21E+00 |
| Simulated analysis #18         | 1.11E+00 | 1.85E+01 | 5.21E+00 |
| Simulated analysis #19         | 1.11E+00 | 1.85E+01 | 5.21E+00 |
| Simulated analysis #20         | 1.11E+00 | 1.85E+01 | 5.21E+00 |
| Simulated analysis #21         | 1.11E+00 | 1.85E+01 | 5.21E+00 |
| Simulated analysis #22         | 1.11E+00 | 1.85E+01 | 5.21E+00 |
| Simulated analysis #23         | 1.11E+00 | 1.85E+01 | 5.21E+00 |
| Simulated analysis #24         | 1.11E+00 | 1.85E+01 | 5.21E+00 |
| Simulated analysis #25         | 1.11E+00 | 1.85E+01 | 5.21E+00 |
| Simulated analysis #26         | 1.11E+00 | 1.85E+01 | 5.21E+00 |
| Simulated analysis #27         | 1.11E+00 | 1.85E+01 | 5.21E+00 |
| Simulated analysis #28         | 1.11E+00 | 1.85E+01 | 5.21E+00 |
| Simulated analysis #29         | 1.11E+00 | 1.85E+01 | 5.21E+00 |
| Simulated analysis #30         | 1.11E+00 | 1.85E+01 | 5.21E+00 |
| Simulated analysis #31         | 1.11E+00 | 1.85E+01 | 5.21E+00 |

















































































































































































































































































|                          |          |          |          |
|--------------------------|----------|----------|----------|
| Simulated analysis #4993 | 1.11E+00 | 1.85E+01 | 5.21E+00 |
| Simulated analysis #4994 | 1.11E+00 | 1.85E+01 | 5.21E+00 |
| Simulated analysis #4995 | 1.11E+00 | 1.85E+01 | 5.21E+00 |
| Simulated analysis #4996 | 1.11E+00 | 1.85E+01 | 5.21E+00 |
| Simulated analysis #4997 | 1.11E+00 | 1.85E+01 | 5.21E+00 |
| Simulated analysis #4998 | 1.11E+00 | 1.85E+01 | 5.21E+00 |
| Simulated analysis #4999 | 1.11E+00 | 1.85E+01 | 5.21E+00 |
| Simulated analysis #5000 | 1.11E+00 | 1.85E+01 | 5.21E+00 |

























































































































































































































































































green fields to the left, and run the "Run simulations" macro in order to automatically test a var

s (e.g. H1, Fe56, Pb208). These fields allow you to automatically calculate the error for twent  
opes. For example, because Fe is ~92% Fe56, fill in 0.92. The sum of isotopes A, B, C, and D shou  
opes. The sum of isotopes A, B, C, and D should be one.























































































































































































































































































riety of S and N.

ty samples. Fill in the total sample voltage and total sample voltage in the green box. Run the "F

ld be one.





















































































































































































































































































Run simulations" macro from the macro menu, or press option+cmd+n to run automatically.

| <b>Finst</b> | <b>RxMT</b> | <b>RyMT</b> | <b>RzMT</b> | <b>d</b> |
|--------------|-------------|-------------|-------------|----------|
| 1            | 5.04        | 4.94        | 17.18       | 1.77     |
| 1            | 5.04        | 4.93        | 17.18       | 1.77     |
| 1            | 5.04        | 4.93        | 17.18       | 1.77     |
| 1            | 5.04        | 4.93        | 17.18       | 1.77     |
| 1            | 5.04        | 4.93        | 17.18       | 1.77     |
| 1            | 5.04        | 4.93        | 17.18       | 1.77     |
| 1            | 5.04        | 4.93        | 17.18       | 1.77     |
| 1            | 5.04        | 4.93        | 17.18       | 1.77     |
| 1            | 5.04        | 4.93        | 17.18       | 1.77     |
| 1            | 5.04        | 4.93        | 17.18       | 1.77     |
| 1            | 5.04        | 4.94        | 17.18       | 1.77     |
| 1            | 5.04        | 4.93        | 17.18       | 1.77     |
| 1            | 5.04        | 4.93        | 17.18       | 1.77     |
| 1            | 5.04        | 4.93        | 17.18       | 1.77     |
| 1            | 5.04        | 4.93        | 17.18       | 1.77     |
| 1            | 5.04        | 4.93        | 17.18       | 1.77     |
| 1            | 5.04        | 4.93        | 17.18       | 1.77     |
| 1            | 5.04        | 4.93        | 17.18       | 1.77     |
| 1            | 5.04        | 4.93        | 17.18       | 1.77     |
| 1            | 5.04        | 4.93        | 17.18       | 1.77     |
| 1            | 5.04        | 4.93        | 17.18       | 1.77     |
| 1            | 5.04        | 4.93        | 17.18       | 1.77     |
| 1            | 5.04        | 4.93        | 17.18       | 1.77     |
| 1            | 5.04        | 4.93        | 17.18       | 1.77     |
| 1            | 5.04        | 4.93        | 17.18       | 1.77     |
| 1            | 5.04        | 4.94        | 17.18       | 1.77     |
| 1            | 5.04        | 4.93        | 17.18       | 1.77     |
| 1            | 5.04        | 4.93        | 17.18       | 1.77     |



|   |      |      |       |      |
|---|------|------|-------|------|
| 1 | 5.04 | 4.93 | 17.18 | 1.77 |
| 1 | 5.04 | 4.93 | 17.18 | 1.77 |
| 1 | 5.04 | 4.94 | 17.18 | 1.77 |
| 1 | 5.04 | 4.94 | 17.18 | 1.77 |
| 1 | 5.04 | 4.94 | 17.18 | 1.77 |
| 1 | 5.04 | 4.93 | 17.18 | 1.77 |
| 1 | 5.04 | 4.93 | 17.18 | 1.77 |
| 1 | 5.04 | 4.93 | 17.18 | 1.77 |
| 1 | 5.04 | 4.93 | 17.18 | 1.77 |
| 1 | 5.04 | 4.94 | 17.18 | 1.77 |
| 1 | 5.04 | 4.93 | 17.18 | 1.77 |
| 1 | 5.04 | 4.93 | 17.18 | 1.77 |
| 1 | 5.04 | 4.93 | 17.18 | 1.77 |
| 1 | 5.04 | 4.93 | 17.18 | 1.77 |
| 1 | 5.04 | 4.94 | 17.18 | 1.77 |
| 1 | 5.04 | 4.93 | 17.18 | 1.77 |
| 1 | 5.04 | 4.94 | 17.18 | 1.77 |
| 1 | 5.04 | 4.94 | 17.18 | 1.77 |
| 1 | 5.04 | 4.93 | 17.18 | 1.77 |
| 1 | 5.04 | 4.93 | 17.18 | 1.77 |
| 1 | 5.04 | 4.93 | 17.18 | 1.77 |
| 1 | 5.04 | 4.93 | 17.18 | 1.77 |
| 1 | 5.04 | 4.93 | 17.18 | 1.77 |
| 1 | 5.04 | 4.94 | 17.18 | 1.77 |
| 1 | 5.04 | 4.94 | 17.18 | 1.77 |
| 1 | 5.04 | 4.93 | 17.18 | 1.77 |
| 1 | 5.04 | 4.93 | 17.18 | 1.77 |
| 1 | 5.04 | 4.94 | 17.18 | 1.77 |
| 1 | 5.04 | 4.93 | 17.18 | 1.77 |
| 1 | 5.04 | 4.93 | 17.18 | 1.77 |
| 1 | 5.04 | 4.94 | 17.18 | 1.77 |
| 1 | 5.04 | 4.93 | 17.18 | 1.77 |
| 1 | 5.04 | 4.93 | 17.18 | 1.77 |







|   |      |      |       |      |
|---|------|------|-------|------|
| 1 | 5.04 | 4.93 | 17.18 | 1.77 |
| 1 | 5.04 | 4.93 | 17.18 | 1.77 |
| 1 | 5.04 | 4.94 | 17.18 | 1.77 |
| 1 | 5.04 | 4.93 | 17.18 | 1.77 |
| 1 | 5.04 | 4.93 | 17.18 | 1.77 |
| 1 | 5.04 | 4.93 | 17.18 | 1.77 |
| 1 | 5.04 | 4.93 | 17.18 | 1.77 |
| 1 | 5.04 | 4.93 | 17.18 | 1.77 |
| 1 | 5.04 | 4.93 | 17.18 | 1.77 |
| 1 | 5.04 | 4.94 | 17.18 | 1.77 |
| 1 | 5.04 | 4.93 | 17.18 | 1.77 |
| 1 | 5.04 | 4.94 | 17.18 | 1.77 |
| 1 | 5.04 | 4.94 | 17.18 | 1.77 |
| 1 | 5.04 | 4.93 | 17.18 | 1.77 |
| 1 | 5.04 | 4.94 | 17.18 | 1.77 |
| 1 | 5.04 | 4.93 | 17.18 | 1.77 |
| 1 | 5.04 | 4.94 | 17.18 | 1.77 |
| 1 | 5.04 | 4.93 | 17.18 | 1.77 |
| 1 | 5.04 | 4.94 | 17.18 | 1.77 |
| 1 | 5.04 | 4.93 | 17.18 | 1.77 |
| 1 | 5.04 | 4.93 | 17.18 | 1.77 |
| 1 | 5.04 | 4.94 | 17.18 | 1.77 |
| 1 | 5.04 | 4.94 | 17.18 | 1.77 |
| 1 | 5.04 | 4.93 | 17.18 | 1.77 |
| 1 | 5.04 | 4.93 | 17.18 | 1.77 |
| 1 | 5.04 | 4.93 | 17.18 | 1.77 |
| 1 | 5.04 | 4.93 | 17.18 | 1.77 |
| 1 | 5.04 | 4.94 | 17.18 | 1.77 |
| 1 | 5.04 | 4.93 | 17.18 | 1.77 |
| 1 | 5.04 | 4.93 | 17.18 | 1.77 |
| 1 | 5.04 | 4.93 | 17.18 | 1.77 |
| 1 | 5.04 | 4.93 | 17.18 | 1.77 |
| 1 | 5.04 | 4.93 | 17.18 | 1.77 |
| 1 | 5.04 | 4.93 | 17.18 | 1.77 |
| 1 | 5.04 | 4.93 | 17.18 | 1.77 |
| 1 | 5.04 | 4.94 | 17.18 | 1.77 |
| 1 | 5.04 | 4.93 | 17.18 | 1.77 |
| 1 | 5.04 | 4.93 | 17.18 | 1.77 |

|   |      |      |       |      |
|---|------|------|-------|------|
| 1 | 5.04 | 4.93 | 17.18 | 1.77 |
| 1 | 5.04 | 4.93 | 17.18 | 1.77 |
| 1 | 5.04 | 4.94 | 17.18 | 1.77 |
| 1 | 5.04 | 4.94 | 17.18 | 1.77 |
| 1 | 5.04 | 4.94 | 17.18 | 1.77 |
| 1 | 5.04 | 4.93 | 17.18 | 1.77 |
| 1 | 5.04 | 4.93 | 17.18 | 1.77 |
| 1 | 5.04 | 4.93 | 17.18 | 1.77 |
| 1 | 5.04 | 4.93 | 17.18 | 1.77 |
| 1 | 5.04 | 4.93 | 17.18 | 1.77 |
| 1 | 5.04 | 4.93 | 17.18 | 1.77 |
| 1 | 5.04 | 4.93 | 17.18 | 1.77 |
| 1 | 5.04 | 4.93 | 17.18 | 1.77 |
| 1 | 5.04 | 4.93 | 17.18 | 1.77 |
| 1 | 5.04 | 4.94 | 17.18 | 1.77 |
| 1 | 5.04 | 4.93 | 17.18 | 1.77 |
| 1 | 5.04 | 4.93 | 17.18 | 1.77 |
| 1 | 5.04 | 4.94 | 17.18 | 1.77 |
| 1 | 5.04 | 4.93 | 17.18 | 1.77 |
| 1 | 5.04 | 4.93 | 17.18 | 1.77 |
| 1 | 5.04 | 4.94 | 17.18 | 1.77 |
| 1 | 5.04 | 4.93 | 17.18 | 1.77 |
| 1 | 5.04 | 4.93 | 17.18 | 1.77 |
| 1 | 5.04 | 4.93 | 17.18 | 1.77 |
| 1 | 5.04 | 4.93 | 17.18 | 1.77 |
| 1 | 5.04 | 4.93 | 17.18 | 1.77 |
| 1 | 5.04 | 4.93 | 17.18 | 1.77 |
| 1 | 5.04 | 4.93 | 17.18 | 1.77 |
| 1 | 5.04 | 4.93 | 17.18 | 1.77 |
| 1 | 5.04 | 4.93 | 17.18 | 1.77 |
| 1 | 5.04 | 4.94 | 17.18 | 1.77 |
| 1 | 5.04 | 4.93 | 17.18 | 1.77 |
| 1 | 5.04 | 4.93 | 17.18 | 1.77 |
| 1 | 5.04 | 4.93 | 17.18 | 1.77 |
| 1 | 5.04 | 4.94 | 17.18 | 1.77 |
| 1 | 5.04 | 4.94 | 17.18 | 1.77 |
| 1 | 5.04 | 4.93 | 17.18 | 1.77 |





|   |      |      |       |      |
|---|------|------|-------|------|
| 1 | 5.04 | 4.93 | 17.18 | 1.77 |
| 1 | 5.04 | 4.93 | 17.18 | 1.77 |
| 1 | 5.04 | 4.94 | 17.18 | 1.77 |
| 1 | 5.04 | 4.94 | 17.18 | 1.77 |
| 1 | 5.04 | 4.94 | 17.18 | 1.77 |
| 1 | 5.04 | 4.93 | 17.18 | 1.77 |
| 1 | 5.04 | 4.93 | 17.18 | 1.77 |
| 1 | 5.04 | 4.93 | 17.18 | 1.77 |
| 1 | 5.04 | 4.93 | 17.18 | 1.77 |
| 1 | 5.04 | 4.94 | 17.18 | 1.77 |
| 1 | 5.04 | 4.93 | 17.18 | 1.77 |
| 1 | 5.04 | 4.93 | 17.18 | 1.77 |
| 1 | 5.04 | 4.93 | 17.18 | 1.77 |
| 1 | 5.04 | 4.93 | 17.18 | 1.77 |
| 1 | 5.04 | 4.93 | 17.18 | 1.77 |
| 1 | 5.04 | 4.93 | 17.18 | 1.77 |
| 1 | 5.04 | 4.93 | 17.18 | 1.77 |
| 1 | 5.04 | 4.93 | 17.18 | 1.77 |
| 1 | 5.04 | 4.93 | 17.18 | 1.77 |
| 1 | 5.04 | 4.93 | 17.18 | 1.77 |
| 1 | 5.04 | 4.94 | 17.18 | 1.77 |
| 1 | 5.04 | 4.94 | 17.18 | 1.77 |
| 1 | 5.04 | 4.93 | 17.18 | 1.77 |
| 1 | 5.04 | 4.93 | 17.18 | 1.77 |
| 1 | 5.04 | 4.93 | 17.18 | 1.77 |
| 1 | 5.04 | 4.94 | 17.18 | 1.77 |
| 1 | 5.04 | 4.94 | 17.18 | 1.77 |
| 1 | 5.04 | 4.93 | 17.18 | 1.77 |
| 1 | 5.04 | 4.93 | 17.18 | 1.77 |
| 1 | 5.04 | 4.93 | 17.18 | 1.77 |
| 1 | 5.04 | 4.93 | 17.18 | 1.77 |
| 1 | 5.04 | 4.94 | 17.18 | 1.77 |
| 1 | 5.04 | 4.93 | 17.18 | 1.77 |
| 1 | 5.04 | 4.93 | 17.18 | 1.77 |
| 1 | 5.04 | 4.94 | 17.18 | 1.77 |
| 1 | 5.04 | 4.93 | 17.18 | 1.77 |
| 1 | 5.04 | 4.93 | 17.18 | 1.77 |
| 1 | 5.04 | 4.94 | 17.18 | 1.77 |







|   |      |      |       |      |
|---|------|------|-------|------|
| 1 | 5.04 | 4.93 | 17.18 | 1.77 |
| 1 | 5.04 | 4.93 | 17.18 | 1.77 |
| 1 | 5.04 | 4.93 | 17.18 | 1.77 |
| 1 | 5.04 | 4.93 | 17.18 | 1.77 |
| 1 | 5.04 | 4.93 | 17.18 | 1.77 |
| 1 | 5.04 | 4.94 | 17.18 | 1.77 |
| 1 | 5.04 | 4.93 | 17.18 | 1.77 |
| 1 | 5.04 | 4.94 | 17.18 | 1.77 |
| 1 | 5.04 | 4.94 | 17.18 | 1.77 |
| 1 | 5.04 | 4.93 | 17.18 | 1.77 |
| 1 | 5.04 | 4.93 | 17.18 | 1.77 |
| 1 | 5.04 | 4.93 | 17.18 | 1.77 |
| 1 | 5.04 | 4.94 | 17.18 | 1.77 |
| 1 | 5.04 | 4.93 | 17.18 | 1.77 |
| 1 | 5.04 | 4.93 | 17.18 | 1.77 |
| 1 | 5.04 | 4.94 | 17.18 | 1.77 |
| 1 | 5.04 | 4.93 | 17.18 | 1.77 |
| 1 | 5.04 | 4.93 | 17.18 | 1.77 |
| 1 | 5.04 | 4.94 | 17.18 | 1.77 |
| 1 | 5.04 | 4.93 | 17.18 | 1.77 |
| 1 | 5.04 | 4.93 | 17.18 | 1.77 |
| 1 | 5.04 | 4.93 | 17.18 | 1.77 |
| 1 | 5.04 | 4.93 | 17.18 | 1.77 |
| 1 | 5.04 | 4.94 | 17.18 | 1.77 |
| 1 | 5.04 | 4.93 | 17.18 | 1.77 |
| 1 | 5.04 | 4.93 | 17.18 | 1.77 |
| 1 | 5.04 | 4.93 | 17.18 | 1.77 |
| 1 | 5.04 | 4.93 | 17.18 | 1.77 |
| 1 | 5.04 | 4.94 | 17.18 | 1.77 |
| 1 | 5.04 | 4.93 | 17.18 | 1.77 |
| 1 | 5.04 | 4.94 | 17.18 | 1.77 |
| 1 | 5.04 | 4.94 | 17.18 | 1.77 |
| 1 | 5.04 | 4.93 | 17.18 | 1.77 |
| 1 | 5.04 | 4.93 | 17.18 | 1.77 |
| 1 | 5.04 | 4.94 | 17.18 | 1.77 |
| 1 | 5.04 | 4.94 | 17.18 | 1.77 |
| 1 | 5.04 | 4.93 | 17.18 | 1.77 |
| 1 | 5.04 | 4.93 | 17.18 | 1.77 |







|   |      |      |       |      |
|---|------|------|-------|------|
| 1 | 5.04 | 4.93 | 17.18 | 1.77 |
| 1 | 5.04 | 4.93 | 17.18 | 1.77 |
| 1 | 5.04 | 4.93 | 17.18 | 1.77 |
| 1 | 5.04 | 4.93 | 17.18 | 1.77 |
| 1 | 5.04 | 4.93 | 17.18 | 1.77 |
| 1 | 5.04 | 4.93 | 17.18 | 1.77 |
| 1 | 5.04 | 4.93 | 17.18 | 1.77 |
| 1 | 5.04 | 4.93 | 17.18 | 1.77 |
| 1 | 5.04 | 4.93 | 17.18 | 1.77 |
| 1 | 5.04 | 4.94 | 17.18 | 1.77 |
| 1 | 5.04 | 4.94 | 17.18 | 1.77 |
| 1 | 5.04 | 4.93 | 17.18 | 1.77 |
| 1 | 5.04 | 4.94 | 17.18 | 1.77 |
| 1 | 5.04 | 4.93 | 17.18 | 1.77 |
| 1 | 5.04 | 4.93 | 17.18 | 1.77 |
| 1 | 5.04 | 4.93 | 17.18 | 1.77 |
| 1 | 5.04 | 4.93 | 17.18 | 1.77 |
| 1 | 5.04 | 4.93 | 17.18 | 1.77 |
| 1 | 5.04 | 4.93 | 17.18 | 1.77 |
| 1 | 5.04 | 4.93 | 17.18 | 1.77 |
| 1 | 5.04 | 4.93 | 17.18 | 1.77 |
| 1 | 5.04 | 4.93 | 17.18 | 1.77 |
| 1 | 5.04 | 4.93 | 17.18 | 1.77 |
| 1 | 5.04 | 4.93 | 17.18 | 1.77 |
| 1 | 5.04 | 4.94 | 17.18 | 1.77 |
| 1 | 5.04 | 4.94 | 17.18 | 1.77 |
| 1 | 5.04 | 4.94 | 17.18 | 1.77 |
| 1 | 5.04 | 4.93 | 17.18 | 1.77 |
| 1 | 5.04 | 4.93 | 17.18 | 1.77 |
| 1 | 5.04 | 4.93 | 17.18 | 1.77 |
| 1 | 5.04 | 4.94 | 17.18 | 1.77 |
| 1 | 5.04 | 4.93 | 17.18 | 1.77 |
| 1 | 5.04 | 4.93 | 17.18 | 1.77 |



|   |      |      |       |      |
|---|------|------|-------|------|
| 1 | 5.04 | 4.94 | 17.18 | 1.77 |
| 1 | 5.04 | 4.93 | 17.18 | 1.77 |
| 1 | 5.04 | 4.93 | 17.18 | 1.77 |
| 1 | 5.04 | 4.93 | 17.18 | 1.77 |
| 1 | 5.04 | 4.93 | 17.18 | 1.77 |
| 1 | 5.04 | 4.93 | 17.18 | 1.77 |
| 1 | 5.04 | 4.94 | 17.18 | 1.77 |
| 1 | 5.04 | 4.93 | 17.18 | 1.77 |
| 1 | 5.04 | 4.93 | 17.18 | 1.77 |
| 1 | 5.04 | 4.94 | 17.18 | 1.77 |
| 1 | 5.04 | 4.93 | 17.18 | 1.77 |
| 1 | 5.04 | 4.93 | 17.18 | 1.77 |
| 1 | 5.04 | 4.93 | 17.18 | 1.77 |
| 1 | 5.04 | 4.93 | 17.18 | 1.77 |
| 1 | 5.04 | 4.93 | 17.18 | 1.77 |
| 1 | 5.04 | 4.93 | 17.18 | 1.77 |
| 1 | 5.04 | 4.94 | 17.18 | 1.77 |
| 1 | 5.04 | 4.93 | 17.18 | 1.77 |
| 1 | 5.04 | 4.93 | 17.18 | 1.77 |
| 1 | 5.04 | 4.93 | 17.18 | 1.77 |
| 1 | 5.04 | 4.93 | 17.18 | 1.77 |
| 1 | 5.04 | 4.93 | 17.18 | 1.77 |
| 1 | 5.04 | 4.93 | 17.18 | 1.77 |
| 1 | 5.04 | 4.93 | 17.18 | 1.77 |
| 1 | 5.04 | 4.93 | 17.18 | 1.77 |
| 1 | 5.04 | 4.94 | 17.18 | 1.77 |
| 1 | 5.04 | 4.93 | 17.18 | 1.77 |
| 1 | 5.04 | 4.94 | 17.18 | 1.77 |
| 1 | 5.04 | 4.93 | 17.18 | 1.77 |
| 1 | 5.04 | 4.94 | 17.18 | 1.77 |
| 1 | 5.04 | 4.93 | 17.18 | 1.77 |
| 1 | 5.04 | 4.93 | 17.18 | 1.77 |
| 1 | 5.04 | 4.93 | 17.18 | 1.77 |



|   |      |      |       |      |
|---|------|------|-------|------|
| 1 | 5.04 | 4.93 | 17.18 | 1.77 |
| 1 | 5.04 | 4.93 | 17.18 | 1.77 |
| 1 | 5.04 | 4.93 | 17.18 | 1.77 |
| 1 | 5.04 | 4.94 | 17.18 | 1.77 |
| 1 | 5.04 | 4.94 | 17.18 | 1.77 |
| 1 | 5.04 | 4.93 | 17.18 | 1.77 |
| 1 | 5.04 | 4.94 | 17.18 | 1.77 |
| 1 | 5.04 | 4.93 | 17.18 | 1.77 |
| 1 | 5.04 | 4.93 | 17.18 | 1.77 |
| 1 | 5.04 | 4.93 | 17.18 | 1.77 |
| 1 | 5.04 | 4.93 | 17.18 | 1.77 |
| 1 | 5.04 | 4.93 | 17.18 | 1.77 |
| 1 | 5.04 | 4.93 | 17.18 | 1.77 |
| 1 | 5.04 | 4.94 | 17.18 | 1.77 |
| 1 | 5.04 | 4.93 | 17.18 | 1.77 |
| 1 | 5.04 | 4.93 | 17.18 | 1.77 |
| 1 | 5.04 | 4.93 | 17.18 | 1.77 |
| 1 | 5.04 | 4.93 | 17.18 | 1.77 |
| 1 | 5.04 | 4.93 | 17.18 | 1.77 |
| 1 | 5.04 | 4.93 | 17.18 | 1.77 |
| 1 | 5.04 | 4.93 | 17.18 | 1.77 |
| 1 | 5.04 | 4.94 | 17.18 | 1.77 |
| 1 | 5.04 | 4.93 | 17.18 | 1.77 |
| 1 | 5.04 | 4.93 | 17.18 | 1.77 |
| 1 | 5.04 | 4.94 | 17.18 | 1.77 |
| 1 | 5.04 | 4.93 | 17.18 | 1.77 |
| 1 | 5.04 | 4.93 | 17.18 | 1.77 |
| 1 | 5.04 | 4.93 | 17.18 | 1.77 |
| 1 | 5.04 | 4.93 | 17.18 | 1.77 |
| 1 | 5.04 | 4.93 | 17.18 | 1.77 |
| 1 | 5.04 | 4.93 | 17.18 | 1.77 |
| 1 | 5.04 | 4.94 | 17.18 | 1.77 |
| 1 | 5.04 | 4.93 | 17.18 | 1.77 |
| 1 | 5.04 | 4.93 | 17.18 | 1.77 |

|   |      |      |       |      |
|---|------|------|-------|------|
| 1 | 5.04 | 4.93 | 17.18 | 1.77 |
| 1 | 5.04 | 4.93 | 17.18 | 1.77 |
| 1 | 5.04 | 4.93 | 17.18 | 1.77 |
| 1 | 5.04 | 4.93 | 17.18 | 1.77 |
| 1 | 5.04 | 4.93 | 17.18 | 1.77 |
| 1 | 5.04 | 4.93 | 17.18 | 1.77 |
| 1 | 5.04 | 4.93 | 17.18 | 1.77 |
| 1 | 5.04 | 4.93 | 17.18 | 1.77 |
| 1 | 5.04 | 4.93 | 17.18 | 1.77 |
| 1 | 5.04 | 4.93 | 17.18 | 1.77 |
| 1 | 5.04 | 4.94 | 17.18 | 1.77 |
| 1 | 5.04 | 4.93 | 17.18 | 1.77 |
| 1 | 5.04 | 4.94 | 17.18 | 1.77 |
| 1 | 5.04 | 4.94 | 17.18 | 1.77 |
| 1 | 5.04 | 4.94 | 17.18 | 1.77 |
| 1 | 5.04 | 4.93 | 17.18 | 1.77 |
| 1 | 5.04 | 4.93 | 17.18 | 1.77 |
| 1 | 5.04 | 4.93 | 17.18 | 1.77 |
| 1 | 5.04 | 4.93 | 17.18 | 1.77 |
| 1 | 5.04 | 4.93 | 17.18 | 1.77 |
| 1 | 5.04 | 4.94 | 17.18 | 1.77 |
| 1 | 5.04 | 4.93 | 17.18 | 1.77 |
| 1 | 5.04 | 4.93 | 17.18 | 1.77 |
| 1 | 5.04 | 4.93 | 17.18 | 1.77 |
| 1 | 5.04 | 4.93 | 17.18 | 1.77 |
| 1 | 5.04 | 4.93 | 17.18 | 1.77 |
| 1 | 5.04 | 4.94 | 17.18 | 1.77 |
| 1 | 5.04 | 4.93 | 17.18 | 1.77 |
| 1 | 5.04 | 4.93 | 17.18 | 1.77 |
| 1 | 5.04 | 4.94 | 17.18 | 1.77 |
| 1 | 5.04 | 4.93 | 17.18 | 1.77 |
| 1 | 5.04 | 4.93 | 17.18 | 1.77 |
| 1 | 5.04 | 4.93 | 17.18 | 1.77 |
| 1 | 5.04 | 4.93 | 17.18 | 1.77 |
| 1 | 5.04 | 4.94 | 17.18 | 1.77 |

|   |      |      |       |      |
|---|------|------|-------|------|
| 1 | 5.04 | 4.93 | 17.18 | 1.77 |
| 1 | 5.04 | 4.93 | 17.18 | 1.77 |
| 1 | 5.04 | 4.94 | 17.18 | 1.77 |
| 1 | 5.04 | 4.94 | 17.18 | 1.77 |
| 1 | 5.04 | 4.94 | 17.18 | 1.77 |
| 1 | 5.04 | 4.94 | 17.18 | 1.77 |
| 1 | 5.04 | 4.93 | 17.18 | 1.77 |
| 1 | 5.04 | 4.93 | 17.18 | 1.77 |
| 1 | 5.04 | 4.94 | 17.18 | 1.77 |
| 1 | 5.04 | 4.94 | 17.18 | 1.77 |
| 1 | 5.04 | 4.93 | 17.18 | 1.77 |
| 1 | 5.04 | 4.93 | 17.18 | 1.77 |
| 1 | 5.04 | 4.93 | 17.18 | 1.77 |
| 1 | 5.04 | 4.93 | 17.18 | 1.77 |
| 1 | 5.04 | 4.94 | 17.18 | 1.77 |
| 1 | 5.04 | 4.93 | 17.18 | 1.77 |
| 1 | 5.04 | 4.93 | 17.18 | 1.77 |
| 1 | 5.04 | 4.93 | 17.18 | 1.77 |
| 1 | 5.04 | 4.93 | 17.18 | 1.77 |
| 1 | 5.04 | 4.93 | 17.18 | 1.77 |
| 1 | 5.04 | 4.93 | 17.18 | 1.77 |
| 1 | 5.04 | 4.93 | 17.18 | 1.77 |
| 1 | 5.04 | 4.94 | 17.18 | 1.77 |
| 1 | 5.04 | 4.93 | 17.18 | 1.77 |
| 1 | 5.04 | 4.93 | 17.18 | 1.77 |
| 1 | 5.04 | 4.93 | 17.18 | 1.77 |
| 1 | 5.04 | 4.93 | 17.18 | 1.77 |
| 1 | 5.04 | 4.93 | 17.18 | 1.77 |
| 1 | 5.04 | 4.93 | 17.18 | 1.77 |
| 1 | 5.04 | 4.93 | 17.18 | 1.77 |
| 1 | 5.04 | 4.93 | 17.18 | 1.77 |
| 1 | 5.04 | 4.94 | 17.18 | 1.77 |
| 1 | 5.04 | 4.93 | 17.18 | 1.77 |
| 1 | 5.04 | 4.94 | 17.18 | 1.77 |





|   |      |      |       |      |
|---|------|------|-------|------|
| 1 | 5.04 | 4.93 | 17.18 | 1.77 |
| 1 | 5.04 | 4.93 | 17.18 | 1.77 |
| 1 | 5.04 | 4.93 | 17.18 | 1.77 |
| 1 | 5.04 | 4.93 | 17.18 | 1.77 |
| 1 | 5.04 | 4.93 | 17.18 | 1.77 |
| 1 | 5.04 | 4.93 | 17.18 | 1.77 |
| 1 | 5.04 | 4.93 | 17.18 | 1.77 |
| 1 | 5.04 | 4.93 | 17.18 | 1.77 |
| 1 | 5.04 | 4.93 | 17.18 | 1.77 |
| 1 | 5.04 | 4.93 | 17.18 | 1.77 |
| 1 | 5.04 | 4.93 | 17.18 | 1.77 |
| 1 | 5.04 | 4.93 | 17.18 | 1.77 |
| 1 | 5.04 | 4.94 | 17.18 | 1.77 |
| 1 | 5.04 | 4.93 | 17.18 | 1.77 |
| 1 | 5.04 | 4.93 | 17.18 | 1.77 |
| 1 | 5.04 | 4.93 | 17.18 | 1.77 |
| 1 | 5.04 | 4.93 | 17.18 | 1.77 |
| 1 | 5.04 | 4.93 | 17.18 | 1.77 |
| 1 | 5.04 | 4.93 | 17.18 | 1.77 |
| 1 | 5.04 | 4.93 | 17.18 | 1.77 |
| 1 | 5.04 | 4.93 | 17.18 | 1.77 |
| 1 | 5.04 | 4.93 | 17.18 | 1.77 |
| 1 | 5.04 | 4.93 | 17.18 | 1.77 |
| 1 | 5.04 | 4.93 | 17.18 | 1.77 |
| 1 | 5.04 | 4.93 | 17.18 | 1.77 |
| 1 | 5.04 | 4.93 | 17.18 | 1.77 |
| 1 | 5.04 | 4.93 | 17.18 | 1.77 |
| 1 | 5.04 | 4.93 | 17.18 | 1.77 |
| 1 | 5.04 | 4.93 | 17.18 | 1.77 |
| 1 | 5.04 | 4.93 | 17.18 | 1.77 |
| 1 | 5.04 | 4.94 | 17.18 | 1.77 |
| 1 | 5.04 | 4.94 | 17.18 | 1.77 |
| 1 | 5.04 | 4.93 | 17.18 | 1.77 |
| 1 | 5.04 | 4.94 | 17.18 | 1.77 |
| 1 | 5.04 | 4.93 | 17.18 | 1.77 |
| 1 | 5.04 | 4.93 | 17.18 | 1.77 |







|   |      |      |       |      |
|---|------|------|-------|------|
| 1 | 5.04 | 4.93 | 17.18 | 1.77 |
| 1 | 5.04 | 4.94 | 17.18 | 1.77 |
| 1 | 5.04 | 4.93 | 17.18 | 1.77 |
| 1 | 5.04 | 4.93 | 17.18 | 1.77 |
| 1 | 5.04 | 4.93 | 17.18 | 1.77 |
| 1 | 5.04 | 4.93 | 17.18 | 1.77 |
| 1 | 5.04 | 4.93 | 17.18 | 1.77 |
| 1 | 5.04 | 4.93 | 17.18 | 1.77 |
| 1 | 5.04 | 4.93 | 17.18 | 1.77 |
| 1 | 5.04 | 4.93 | 17.18 | 1.77 |
| 1 | 5.04 | 4.93 | 17.18 | 1.77 |
| 1 | 5.04 | 4.93 | 17.18 | 1.77 |
| 1 | 5.04 | 4.93 | 17.18 | 1.77 |
| 1 | 5.04 | 4.94 | 17.18 | 1.77 |
| 1 | 5.04 | 4.93 | 17.18 | 1.77 |
| 1 | 5.04 | 4.93 | 17.18 | 1.77 |
| 1 | 5.04 | 4.93 | 17.18 | 1.77 |
| 1 | 5.04 | 4.93 | 17.18 | 1.77 |
| 1 | 5.04 | 4.93 | 17.18 | 1.77 |
| 1 | 5.04 | 4.93 | 17.18 | 1.77 |
| 1 | 5.04 | 4.93 | 17.18 | 1.77 |
| 1 | 5.04 | 4.93 | 17.18 | 1.77 |
| 1 | 5.04 | 4.93 | 17.18 | 1.77 |
| 1 | 5.04 | 4.93 | 17.18 | 1.77 |
| 1 | 5.04 | 4.93 | 17.18 | 1.77 |
| 1 | 5.04 | 4.93 | 17.18 | 1.77 |
| 1 | 5.04 | 4.93 | 17.18 | 1.77 |
| 1 | 5.04 | 4.94 | 17.18 | 1.77 |
| 1 | 5.04 | 4.93 | 17.18 | 1.77 |
| 1 | 5.04 | 4.93 | 17.18 | 1.77 |
| 1 | 5.04 | 4.93 | 17.18 | 1.77 |
| 1 | 5.04 | 4.93 | 17.18 | 1.77 |
| 1 | 5.04 | 4.93 | 17.18 | 1.77 |
| 1 | 5.04 | 4.93 | 17.18 | 1.77 |
| 1 | 5.04 | 4.93 | 17.18 | 1.77 |
| 1 | 5.04 | 4.93 | 17.18 | 1.77 |
| 1 | 5.04 | 4.93 | 17.18 | 1.77 |
| 1 | 5.04 | 4.94 | 17.18 | 1.77 |
| 1 | 5.04 | 4.94 | 17.18 | 1.77 |

|   |      |      |       |      |
|---|------|------|-------|------|
| 1 | 5.04 | 4.93 | 17.18 | 1.77 |
| 1 | 5.04 | 4.93 | 17.18 | 1.77 |
| 1 | 5.04 | 4.93 | 17.18 | 1.77 |
| 1 | 5.04 | 4.93 | 17.18 | 1.77 |
| 1 | 5.04 | 4.93 | 17.18 | 1.77 |
| 1 | 5.04 | 4.94 | 17.18 | 1.77 |
| 1 | 5.04 | 4.94 | 17.18 | 1.77 |
| 1 | 5.04 | 4.93 | 17.18 | 1.77 |
| 1 | 5.04 | 4.94 | 17.18 | 1.77 |
| 1 | 5.04 | 4.93 | 17.18 | 1.77 |
| 1 | 5.04 | 4.94 | 17.18 | 1.77 |
| 1 | 5.04 | 4.93 | 17.18 | 1.77 |
| 1 | 5.04 | 4.93 | 17.18 | 1.77 |
| 1 | 5.04 | 4.93 | 17.18 | 1.77 |
| 1 | 5.04 | 4.94 | 17.18 | 1.77 |
| 1 | 5.04 | 4.93 | 17.18 | 1.77 |
| 1 | 5.04 | 4.93 | 17.18 | 1.77 |
| 1 | 5.04 | 4.93 | 17.18 | 1.77 |
| 1 | 5.04 | 4.94 | 17.18 | 1.77 |
| 1 | 5.04 | 4.93 | 17.18 | 1.77 |
| 1 | 5.04 | 4.93 | 17.18 | 1.77 |
| 1 | 5.04 | 4.93 | 17.18 | 1.77 |
| 1 | 5.04 | 4.93 | 17.18 | 1.77 |
| 1 | 5.04 | 4.94 | 17.18 | 1.77 |
| 1 | 5.04 | 4.93 | 17.18 | 1.77 |
| 1 | 5.04 | 4.93 | 17.18 | 1.77 |
| 1 | 5.04 | 4.93 | 17.18 | 1.77 |
| 1 | 5.04 | 4.94 | 17.18 | 1.77 |
| 1 | 5.04 | 4.93 | 17.18 | 1.77 |
| 1 | 5.04 | 4.93 | 17.18 | 1.77 |
| 1 | 5.04 | 4.94 | 17.18 | 1.77 |
| 1 | 5.04 | 4.93 | 17.18 | 1.77 |
| 1 | 5.04 | 4.94 | 17.18 | 1.77 |
| 1 | 5.04 | 4.93 | 17.18 | 1.77 |
| 1 | 5.04 | 4.93 | 17.18 | 1.77 |





|   |      |      |       |      |
|---|------|------|-------|------|
| 1 | 5.04 | 4.93 | 17.18 | 1.77 |
| 1 | 5.04 | 4.93 | 17.18 | 1.77 |
| 1 | 5.04 | 4.93 | 17.18 | 1.77 |
| 1 | 5.04 | 4.93 | 17.18 | 1.77 |
| 1 | 5.04 | 4.93 | 17.18 | 1.77 |
| 1 | 5.04 | 4.93 | 17.18 | 1.77 |
| 1 | 5.04 | 4.93 | 17.18 | 1.77 |
| 1 | 5.04 | 4.93 | 17.18 | 1.77 |
| 1 | 5.04 | 4.93 | 17.18 | 1.77 |
| 1 | 5.04 | 4.93 | 17.18 | 1.77 |
| 1 | 5.04 | 4.93 | 17.18 | 1.77 |
| 1 | 5.04 | 4.93 | 17.18 | 1.77 |
| 1 | 5.04 | 4.93 | 17.18 | 1.77 |
| 1 | 5.04 | 4.93 | 17.18 | 1.77 |
| 1 | 5.04 | 4.93 | 17.18 | 1.77 |
| 1 | 5.04 | 4.94 | 17.18 | 1.77 |
| 1 | 5.04 | 4.94 | 17.18 | 1.77 |
| 1 | 5.04 | 4.93 | 17.18 | 1.77 |
| 1 | 5.04 | 4.93 | 17.18 | 1.77 |
| 1 | 5.04 | 4.93 | 17.18 | 1.77 |
| 1 | 5.04 | 4.94 | 17.18 | 1.77 |
| 1 | 5.04 | 4.94 | 17.18 | 1.77 |
| 1 | 5.04 | 4.93 | 17.18 | 1.77 |
| 1 | 5.04 | 4.93 | 17.18 | 1.77 |
| 1 | 5.04 | 4.93 | 17.18 | 1.77 |
| 1 | 5.04 | 4.94 | 17.18 | 1.77 |
| 1 | 5.04 | 4.94 | 17.18 | 1.77 |
| 1 | 5.04 | 4.93 | 17.18 | 1.77 |
| 1 | 5.04 | 4.93 | 17.18 | 1.77 |
| 1 | 5.04 | 4.93 | 17.18 | 1.77 |
| 1 | 5.04 | 4.94 | 17.18 | 1.77 |
| 1 | 5.04 | 4.93 | 17.18 | 1.77 |
| 1 | 5.04 | 4.93 | 17.18 | 1.77 |
| 1 | 5.04 | 4.94 | 17.18 | 1.77 |
| 1 | 5.04 | 4.93 | 17.18 | 1.77 |
| 1 | 5.04 | 4.94 | 17.18 | 1.77 |
| 1 | 5.04 | 4.93 | 17.18 | 1.77 |
| 1 | 5.04 | 4.94 | 17.18 | 1.77 |
| 1 | 5.04 | 4.93 | 17.18 | 1.77 |
| 1 | 5.04 | 4.93 | 17.18 | 1.77 |

|   |      |      |       |      |
|---|------|------|-------|------|
| 1 | 5.04 | 4.94 | 17.18 | 1.77 |
| 1 | 5.04 | 4.93 | 17.18 | 1.77 |
| 1 | 5.04 | 4.94 | 17.18 | 1.77 |
| 1 | 5.04 | 4.93 | 17.18 | 1.77 |
| 1 | 5.04 | 4.94 | 17.18 | 1.77 |
| 1 | 5.04 | 4.93 | 17.18 | 1.77 |
| 1 | 5.04 | 4.93 | 17.18 | 1.77 |
| 1 | 5.04 | 4.93 | 17.18 | 1.77 |
| 1 | 5.04 | 4.94 | 17.18 | 1.77 |
| 1 | 5.04 | 4.93 | 17.18 | 1.77 |
| 1 | 5.04 | 4.93 | 17.18 | 1.77 |
| 1 | 5.04 | 4.93 | 17.18 | 1.77 |
| 1 | 5.04 | 4.94 | 17.18 | 1.77 |
| 1 | 5.04 | 4.93 | 17.18 | 1.77 |
| 1 | 5.04 | 4.93 | 17.18 | 1.77 |
| 1 | 5.04 | 4.93 | 17.18 | 1.77 |
| 1 | 5.04 | 4.94 | 17.18 | 1.77 |
| 1 | 5.04 | 4.93 | 17.18 | 1.77 |
| 1 | 5.04 | 4.93 | 17.18 | 1.77 |
| 1 | 5.04 | 4.93 | 17.18 | 1.77 |
| 1 | 5.04 | 4.93 | 17.18 | 1.77 |
| 1 | 5.04 | 4.93 | 17.18 | 1.77 |
| 1 | 5.04 | 4.93 | 17.18 | 1.77 |
| 1 | 5.04 | 4.93 | 17.18 | 1.77 |
| 1 | 5.04 | 4.93 | 17.18 | 1.77 |
| 1 | 5.04 | 4.94 | 17.18 | 1.77 |
| 1 | 5.04 | 4.93 | 17.18 | 1.77 |
| 1 | 5.04 | 4.94 | 17.18 | 1.77 |
| 1 | 5.04 | 4.93 | 17.18 | 1.77 |
| 1 | 5.04 | 4.94 | 17.18 | 1.77 |
| 1 | 5.04 | 4.93 | 17.18 | 1.77 |
| 1 | 5.04 | 4.93 | 17.18 | 1.77 |
| 1 | 5.04 | 4.94 | 17.18 | 1.77 |
| 1 | 5.04 | 4.93 | 17.18 | 1.77 |
| 1 | 5.04 | 4.93 | 17.18 | 1.77 |
| 1 | 5.04 | 4.94 | 17.18 | 1.77 |
| 1 | 5.04 | 4.93 | 17.18 | 1.77 |
| 1 | 5.04 | 4.93 | 17.18 | 1.77 |
| 1 | 5.04 | 4.94 | 17.18 | 1.77 |

|   |      |      |       |      |
|---|------|------|-------|------|
| 1 | 5.04 | 4.94 | 17.18 | 1.77 |
| 1 | 5.04 | 4.94 | 17.18 | 1.77 |
| 1 | 5.04 | 4.93 | 17.18 | 1.77 |
| 1 | 5.04 | 4.94 | 17.18 | 1.77 |
| 1 | 5.04 | 4.93 | 17.18 | 1.77 |
| 1 | 5.04 | 4.93 | 17.18 | 1.77 |
| 1 | 5.04 | 4.93 | 17.18 | 1.77 |
| 1 | 5.04 | 4.94 | 17.18 | 1.77 |
| 1 | 5.04 | 4.93 | 17.18 | 1.77 |
| 1 | 5.04 | 4.93 | 17.18 | 1.77 |
| 1 | 5.04 | 4.94 | 17.18 | 1.77 |
| 1 | 5.04 | 4.93 | 17.18 | 1.77 |
| 1 | 5.04 | 4.93 | 17.18 | 1.77 |
| 1 | 5.04 | 4.93 | 17.18 | 1.77 |
| 1 | 5.04 | 4.93 | 17.18 | 1.77 |
| 1 | 5.04 | 4.94 | 17.18 | 1.77 |
| 1 | 5.04 | 4.93 | 17.18 | 1.77 |
| 1 | 5.04 | 4.93 | 17.18 | 1.77 |
| 1 | 5.04 | 4.94 | 17.18 | 1.77 |
| 1 | 5.04 | 4.93 | 17.18 | 1.77 |
| 1 | 5.04 | 4.93 | 17.18 | 1.77 |
| 1 | 5.04 | 4.94 | 17.18 | 1.77 |
| 1 | 5.04 | 4.93 | 17.18 | 1.77 |
| 1 | 5.04 | 4.93 | 17.18 | 1.77 |
| 1 | 5.04 | 4.94 | 17.18 | 1.77 |
| 1 | 5.04 | 4.93 | 17.18 | 1.77 |
| 1 | 5.04 | 4.93 | 17.18 | 1.77 |
| 1 | 5.04 | 4.94 | 17.18 | 1.77 |
| 1 | 5.04 | 4.94 | 17.18 | 1.77 |
| 1 | 5.04 | 4.93 | 17.18 | 1.77 |

|   |      |      |       |      |
|---|------|------|-------|------|
| 1 | 5.04 | 4.93 | 17.18 | 1.77 |
| 1 | 5.04 | 4.93 | 17.18 | 1.77 |
| 1 | 5.04 | 4.93 | 17.18 | 1.77 |
| 1 | 5.04 | 4.93 | 17.18 | 1.77 |
| 1 | 5.04 | 4.94 | 17.18 | 1.77 |
| 1 | 5.04 | 4.93 | 17.18 | 1.77 |
| 1 | 5.04 | 4.94 | 17.18 | 1.77 |
| 1 | 5.04 | 4.93 | 17.18 | 1.77 |
| 1 | 5.04 | 4.93 | 17.18 | 1.77 |
| 1 | 5.04 | 4.93 | 17.18 | 1.77 |
| 1 | 5.04 | 4.93 | 17.18 | 1.77 |
| 1 | 5.04 | 4.94 | 17.18 | 1.77 |
| 1 | 5.04 | 4.94 | 17.18 | 1.77 |
| 1 | 5.04 | 4.93 | 17.18 | 1.77 |
| 1 | 5.04 | 4.93 | 17.18 | 1.77 |
| 1 | 5.04 | 4.93 | 17.18 | 1.77 |
| 1 | 5.04 | 4.94 | 17.18 | 1.77 |
| 1 | 5.04 | 4.93 | 17.18 | 1.77 |
| 1 | 5.04 | 4.93 | 17.18 | 1.77 |
| 1 | 5.04 | 4.93 | 17.18 | 1.77 |
| 1 | 5.04 | 4.94 | 17.18 | 1.77 |
| 1 | 5.04 | 4.93 | 17.18 | 1.77 |
| 1 | 5.04 | 4.93 | 17.18 | 1.77 |
| 1 | 5.04 | 4.93 | 17.18 | 1.77 |
| 1 | 5.04 | 4.93 | 17.18 | 1.77 |
| 1 | 5.04 | 4.93 | 17.18 | 1.77 |
| 1 | 5.04 | 4.93 | 17.18 | 1.77 |
| 1 | 5.04 | 4.93 | 17.18 | 1.77 |
| 1 | 5.04 | 4.93 | 17.18 | 1.77 |
| 1 | 5.04 | 4.94 | 17.18 | 1.77 |
| 1 | 5.04 | 4.93 | 17.18 | 1.77 |
| 1 | 5.04 | 4.93 | 17.18 | 1.77 |
| 1 | 5.04 | 4.94 | 17.18 | 1.77 |
| 1 | 5.04 | 4.93 | 17.18 | 1.77 |
| 1 | 5.04 | 4.93 | 17.18 | 1.77 |
| 1 | 5.04 | 4.93 | 17.18 | 1.77 |
| 1 | 5.04 | 4.93 | 17.18 | 1.77 |



|   |      |      |       |      |
|---|------|------|-------|------|
| 1 | 5.04 | 4.93 | 17.18 | 1.77 |
| 1 | 5.04 | 4.93 | 17.18 | 1.77 |
| 1 | 5.04 | 4.94 | 17.18 | 1.77 |
| 1 | 5.04 | 4.93 | 17.18 | 1.77 |
| 1 | 5.04 | 4.93 | 17.18 | 1.77 |
| 1 | 5.04 | 4.93 | 17.18 | 1.77 |
| 1 | 5.04 | 4.93 | 17.18 | 1.77 |
| 1 | 5.04 | 4.93 | 17.18 | 1.77 |
| 1 | 5.04 | 4.93 | 17.18 | 1.77 |
| 1 | 5.04 | 4.93 | 17.18 | 1.77 |
| 1 | 5.04 | 4.93 | 17.18 | 1.77 |
| 1 | 5.04 | 4.93 | 17.18 | 1.77 |
| 1 | 5.04 | 4.93 | 17.18 | 1.77 |
| 1 | 5.04 | 4.93 | 17.18 | 1.77 |
| 1 | 5.04 | 4.93 | 17.18 | 1.77 |
| 1 | 5.04 | 4.93 | 17.18 | 1.77 |
| 1 | 5.04 | 4.93 | 17.18 | 1.77 |
| 1 | 5.04 | 4.93 | 17.18 | 1.77 |
| 1 | 5.04 | 4.94 | 17.18 | 1.77 |
| 1 | 5.04 | 4.93 | 17.18 | 1.77 |
| 1 | 5.04 | 4.93 | 17.18 | 1.77 |
| 1 | 5.04 | 4.93 | 17.18 | 1.77 |
| 1 | 5.04 | 4.93 | 17.18 | 1.77 |
| 1 | 5.04 | 4.93 | 17.18 | 1.77 |
| 1 | 5.04 | 4.93 | 17.18 | 1.77 |
| 1 | 5.04 | 4.93 | 17.18 | 1.77 |
| 1 | 5.04 | 4.93 | 17.18 | 1.77 |
| 1 | 5.04 | 4.94 | 17.18 | 1.77 |
| 1 | 5.04 | 4.93 | 17.18 | 1.77 |
| 1 | 5.04 | 4.93 | 17.18 | 1.77 |
| 1 | 5.04 | 4.94 | 17.18 | 1.77 |
| 1 | 5.04 | 4.93 | 17.18 | 1.77 |
| 1 | 5.04 | 4.93 | 17.18 | 1.77 |
| 1 | 5.04 | 4.93 | 17.18 | 1.77 |
| 1 | 5.04 | 4.94 | 17.18 | 1.77 |
| 1 | 5.04 | 4.93 | 17.18 | 1.77 |
| 1 | 5.04 | 4.93 | 17.18 | 1.77 |
| 1 | 5.04 | 4.94 | 17.18 | 1.77 |
| 1 | 5.04 | 4.93 | 17.18 | 1.77 |
| 1 | 5.04 | 4.93 | 17.18 | 1.77 |







|   |      |      |       |      |
|---|------|------|-------|------|
| 1 | 5.04 | 4.93 | 17.18 | 1.77 |
| 1 | 5.04 | 4.93 | 17.18 | 1.77 |
| 1 | 5.04 | 4.94 | 17.18 | 1.77 |
| 1 | 5.04 | 4.93 | 17.18 | 1.77 |
| 1 | 5.04 | 4.93 | 17.18 | 1.77 |
| 1 | 5.04 | 4.93 | 17.18 | 1.77 |
| 1 | 5.04 | 4.93 | 17.18 | 1.77 |
| 1 | 5.04 | 4.93 | 17.18 | 1.77 |
| 1 | 5.04 | 4.93 | 17.18 | 1.77 |
| 1 | 5.04 | 4.94 | 17.18 | 1.77 |
| 1 | 5.04 | 4.93 | 17.18 | 1.77 |
| 1 | 5.04 | 4.93 | 17.18 | 1.77 |
| 1 | 5.04 | 4.93 | 17.18 | 1.77 |
| 1 | 5.04 | 4.93 | 17.18 | 1.77 |
| 1 | 5.04 | 4.94 | 17.18 | 1.77 |
| 1 | 5.04 | 4.93 | 17.18 | 1.77 |
| 1 | 5.04 | 4.93 | 17.18 | 1.77 |
| 1 | 5.04 | 4.93 | 17.18 | 1.77 |
| 1 | 5.04 | 4.93 | 17.18 | 1.77 |
| 1 | 5.04 | 4.93 | 17.18 | 1.77 |
| 1 | 5.04 | 4.93 | 17.18 | 1.77 |
| 1 | 5.04 | 4.93 | 17.18 | 1.77 |
| 1 | 5.04 | 4.94 | 17.18 | 1.77 |
| 1 | 5.04 | 4.93 | 17.18 | 1.77 |
| 1 | 5.04 | 4.93 | 17.18 | 1.77 |
| 1 | 5.04 | 4.93 | 17.18 | 1.77 |
| 1 | 5.04 | 4.93 | 17.18 | 1.77 |
| 1 | 5.04 | 4.93 | 17.18 | 1.77 |
| 1 | 5.04 | 4.93 | 17.18 | 1.77 |
| 1 | 5.04 | 4.93 | 17.18 | 1.77 |
| 1 | 5.04 | 4.93 | 17.18 | 1.77 |
| 1 | 5.04 | 4.93 | 17.18 | 1.77 |
| 1 | 5.04 | 4.93 | 17.18 | 1.77 |
| 1 | 5.04 | 4.93 | 17.18 | 1.77 |
| 1 | 5.04 | 4.94 | 17.18 | 1.77 |
| 1 | 5.04 | 4.93 | 17.18 | 1.77 |



|   |      |      |       |      |
|---|------|------|-------|------|
| 1 | 5.04 | 4.93 | 17.18 | 1.77 |
| 1 | 5.04 | 4.94 | 17.18 | 1.77 |
| 1 | 5.04 | 4.93 | 17.18 | 1.77 |
| 1 | 5.04 | 4.93 | 17.18 | 1.77 |
| 1 | 5.04 | 4.94 | 17.18 | 1.77 |
| 1 | 5.04 | 4.93 | 17.18 | 1.77 |
| 1 | 5.04 | 4.93 | 17.18 | 1.77 |
| 1 | 5.04 | 4.93 | 17.18 | 1.77 |
| 1 | 5.04 | 4.93 | 17.18 | 1.77 |
| 1 | 5.04 | 4.93 | 17.18 | 1.77 |
| 1 | 5.04 | 4.93 | 17.18 | 1.77 |
| 1 | 5.04 | 4.93 | 17.18 | 1.77 |
| 1 | 5.04 | 4.93 | 17.18 | 1.77 |
| 1 | 5.04 | 4.94 | 17.18 | 1.77 |
| 1 | 5.04 | 4.93 | 17.18 | 1.77 |
| 1 | 5.04 | 4.93 | 17.18 | 1.77 |
| 1 | 5.04 | 4.94 | 17.18 | 1.77 |
| 1 | 5.04 | 4.93 | 17.18 | 1.77 |
| 1 | 5.04 | 4.94 | 17.18 | 1.77 |
| 1 | 5.04 | 4.93 | 17.18 | 1.77 |
| 1 | 5.04 | 4.93 | 17.18 | 1.77 |
| 1 | 5.04 | 4.94 | 17.18 | 1.77 |
| 1 | 5.04 | 4.93 | 17.18 | 1.77 |
| 1 | 5.04 | 4.94 | 17.18 | 1.77 |
| 1 | 5.04 | 4.94 | 17.18 | 1.77 |
| 1 | 5.04 | 4.94 | 17.18 | 1.77 |
| 1 | 5.04 | 4.94 | 17.18 | 1.77 |
| 1 | 5.04 | 4.94 | 17.18 | 1.77 |
| 1 | 5.04 | 4.94 | 17.18 | 1.77 |
| 1 | 5.04 | 4.93 | 17.18 | 1.77 |
| 1 | 5.04 | 4.94 | 17.18 | 1.77 |
| 1 | 5.04 | 4.93 | 17.18 | 1.77 |
| 1 | 5.04 | 4.93 | 17.18 | 1.77 |
| 1 | 5.04 | 4.93 | 17.18 | 1.77 |
| 1 | 5.04 | 4.94 | 17.18 | 1.77 |
| 1 | 5.04 | 4.93 | 17.18 | 1.77 |
| 1 | 5.04 | 4.93 | 17.18 | 1.77 |
| 1 | 5.04 | 4.93 | 17.18 | 1.77 |
| 1 | 5.04 | 4.94 | 17.18 | 1.77 |
| 1 | 5.04 | 4.93 | 17.18 | 1.77 |
| 1 | 5.04 | 4.93 | 17.18 | 1.77 |

|   |      |      |       |      |
|---|------|------|-------|------|
| 1 | 5.04 | 4.93 | 17.18 | 1.77 |
| 1 | 5.04 | 4.93 | 17.18 | 1.77 |
| 1 | 5.04 | 4.94 | 17.18 | 1.77 |
| 1 | 5.04 | 4.93 | 17.18 | 1.77 |
| 1 | 5.04 | 4.93 | 17.18 | 1.77 |
| 1 | 5.04 | 4.93 | 17.18 | 1.77 |
| 1 | 5.04 | 4.93 | 17.18 | 1.77 |
| 1 | 5.04 | 4.94 | 17.18 | 1.77 |
| 1 | 5.04 | 4.93 | 17.18 | 1.77 |
| 1 | 5.04 | 4.93 | 17.18 | 1.77 |
| 1 | 5.04 | 4.93 | 17.18 | 1.77 |
| 1 | 5.04 | 4.93 | 17.18 | 1.77 |
| 1 | 5.04 | 4.93 | 17.18 | 1.77 |
| 1 | 5.04 | 4.94 | 17.18 | 1.77 |
| 1 | 5.04 | 4.93 | 17.18 | 1.77 |
| 1 | 5.04 | 4.93 | 17.18 | 1.77 |
| 1 | 5.04 | 4.93 | 17.18 | 1.77 |
| 1 | 5.04 | 4.93 | 17.18 | 1.77 |
| 1 | 5.04 | 4.93 | 17.18 | 1.77 |
| 1 | 5.04 | 4.93 | 17.18 | 1.77 |
| 1 | 5.04 | 4.93 | 17.18 | 1.77 |
| 1 | 5.04 | 4.93 | 17.18 | 1.77 |
| 1 | 5.04 | 4.93 | 17.18 | 1.77 |
| 1 | 5.04 | 4.93 | 17.18 | 1.77 |
| 1 | 5.04 | 4.93 | 17.18 | 1.77 |
| 1 | 5.04 | 4.93 | 17.18 | 1.77 |
| 1 | 5.04 | 4.93 | 17.18 | 1.77 |
| 1 | 5.04 | 4.94 | 17.18 | 1.77 |
| 1 | 5.04 | 4.94 | 17.18 | 1.77 |
| 1 | 5.04 | 4.93 | 17.18 | 1.77 |
| 1 | 5.04 | 4.93 | 17.18 | 1.77 |
| 1 | 5.04 | 4.93 | 17.18 | 1.77 |
| 1 | 5.04 | 4.93 | 17.18 | 1.77 |
| 1 | 5.04 | 4.94 | 17.18 | 1.77 |





|   |      |      |       |      |
|---|------|------|-------|------|
| 1 | 5.04 | 4.93 | 17.18 | 1.77 |
| 1 | 5.04 | 4.93 | 17.18 | 1.77 |
| 1 | 5.04 | 4.94 | 17.18 | 1.77 |
| 1 | 5.04 | 4.93 | 17.18 | 1.77 |
| 1 | 5.04 | 4.93 | 17.18 | 1.77 |
| 1 | 5.04 | 4.93 | 17.18 | 1.77 |
| 1 | 5.04 | 4.93 | 17.18 | 1.77 |
| 1 | 5.04 | 4.93 | 17.18 | 1.77 |
| 1 | 5.04 | 4.93 | 17.18 | 1.77 |
| 1 | 5.04 | 4.94 | 17.18 | 1.77 |
| 1 | 5.04 | 4.94 | 17.18 | 1.77 |
| 1 | 5.04 | 4.93 | 17.18 | 1.77 |
| 1 | 5.04 | 4.93 | 17.18 | 1.77 |
| 1 | 5.04 | 4.94 | 17.18 | 1.77 |
| 1 | 5.04 | 4.93 | 17.18 | 1.77 |
| 1 | 5.04 | 4.93 | 17.18 | 1.77 |
| 1 | 5.04 | 4.93 | 17.18 | 1.77 |
| 1 | 5.04 | 4.93 | 17.18 | 1.77 |
| 1 | 5.04 | 4.94 | 17.18 | 1.77 |
| 1 | 5.04 | 4.93 | 17.18 | 1.77 |
| 1 | 5.04 | 4.93 | 17.18 | 1.77 |
| 1 | 5.04 | 4.93 | 17.18 | 1.77 |
| 1 | 5.04 | 4.94 | 17.18 | 1.77 |
| 1 | 5.04 | 4.93 | 17.18 | 1.77 |
| 1 | 5.04 | 4.93 | 17.18 | 1.77 |
| 1 | 5.04 | 4.94 | 17.18 | 1.77 |
| 1 | 5.04 | 4.93 | 17.18 | 1.77 |
| 1 | 5.04 | 4.94 | 17.18 | 1.77 |
| 1 | 5.04 | 4.94 | 17.18 | 1.77 |
| 1 | 5.04 | 4.93 | 17.18 | 1.77 |
| 1 | 5.04 | 4.93 | 17.18 | 1.77 |
| 1 | 5.04 | 4.93 | 17.18 | 1.77 |
| 1 | 5.04 | 4.94 | 17.18 | 1.77 |
| 1 | 5.04 | 4.94 | 17.18 | 1.77 |
| 1 | 5.04 | 4.93 | 17.18 | 1.77 |
| 1 | 5.04 | 4.93 | 17.18 | 1.77 |
| 1 | 5.04 | 4.93 | 17.18 | 1.77 |

|   |      |      |       |      |
|---|------|------|-------|------|
| 1 | 5.04 | 4.93 | 17.18 | 1.77 |
| 1 | 5.04 | 4.93 | 17.18 | 1.77 |
| 1 | 5.04 | 4.93 | 17.18 | 1.77 |
| 1 | 5.04 | 4.94 | 17.18 | 1.77 |
| 1 | 5.04 | 4.93 | 17.18 | 1.77 |
| 1 | 5.04 | 4.94 | 17.18 | 1.77 |
| 1 | 5.04 | 4.93 | 17.18 | 1.77 |
| 1 | 5.04 | 4.93 | 17.18 | 1.77 |
| 1 | 5.04 | 4.93 | 17.18 | 1.77 |
| 1 | 5.04 | 4.93 | 17.18 | 1.77 |
| 1 | 5.04 | 4.93 | 17.18 | 1.77 |
| 1 | 5.04 | 4.93 | 17.18 | 1.77 |
| 1 | 5.04 | 4.93 | 17.18 | 1.77 |
| 1 | 5.04 | 4.93 | 17.18 | 1.77 |
| 1 | 5.04 | 4.93 | 17.18 | 1.77 |
| 1 | 5.04 | 4.93 | 17.18 | 1.77 |
| 1 | 5.04 | 4.93 | 17.18 | 1.77 |
| 1 | 5.04 | 4.93 | 17.18 | 1.77 |
| 1 | 5.04 | 4.93 | 17.18 | 1.77 |
| 1 | 5.04 | 4.93 | 17.18 | 1.77 |
| 1 | 5.04 | 4.93 | 17.18 | 1.77 |
| 1 | 5.04 | 4.93 | 17.18 | 1.77 |
| 1 | 5.04 | 4.93 | 17.18 | 1.77 |
| 1 | 5.04 | 4.94 | 17.18 | 1.77 |
| 1 | 5.04 | 4.94 | 17.18 | 1.77 |
| 1 | 5.04 | 4.93 | 17.18 | 1.77 |
| 1 | 5.04 | 4.94 | 17.18 | 1.77 |
| 1 | 5.04 | 4.93 | 17.18 | 1.77 |
| 1 | 5.04 | 4.93 | 17.18 | 1.77 |
| 1 | 5.04 | 4.93 | 17.18 | 1.77 |
| 1 | 5.04 | 4.93 | 17.18 | 1.77 |



|   |      |      |       |      |
|---|------|------|-------|------|
| 1 | 5.04 | 4.93 | 17.18 | 1.77 |
| 1 | 5.04 | 4.93 | 17.18 | 1.77 |
| 1 | 5.04 | 4.93 | 17.18 | 1.77 |
| 1 | 5.04 | 4.93 | 17.18 | 1.77 |
| 1 | 5.04 | 4.93 | 17.18 | 1.77 |
| 1 | 5.04 | 4.93 | 17.18 | 1.77 |
| 1 | 5.04 | 4.93 | 17.18 | 1.77 |
| 1 | 5.04 | 4.93 | 17.18 | 1.77 |
| 1 | 5.04 | 4.93 | 17.18 | 1.77 |
| 1 | 5.04 | 4.94 | 17.18 | 1.77 |
| 1 | 5.04 | 4.93 | 17.18 | 1.77 |
| 1 | 5.04 | 4.94 | 17.18 | 1.77 |
| 1 | 5.04 | 4.93 | 17.18 | 1.77 |
| 1 | 5.04 | 4.93 | 17.18 | 1.77 |
| 1 | 5.04 | 4.93 | 17.18 | 1.77 |
| 1 | 5.04 | 4.93 | 17.18 | 1.77 |
| 1 | 5.04 | 4.93 | 17.18 | 1.77 |
| 1 | 5.04 | 4.93 | 17.18 | 1.77 |
| 1 | 5.04 | 4.93 | 17.18 | 1.77 |
| 1 | 5.04 | 4.93 | 17.18 | 1.77 |
| 1 | 5.04 | 4.94 | 17.18 | 1.77 |
| 1 | 5.04 | 4.94 | 17.18 | 1.77 |
| 1 | 5.04 | 4.93 | 17.18 | 1.77 |
| 1 | 5.04 | 4.93 | 17.18 | 1.77 |
| 1 | 5.04 | 4.93 | 17.18 | 1.77 |
| 1 | 5.04 | 4.93 | 17.18 | 1.77 |
| 1 | 5.04 | 4.94 | 17.18 | 1.77 |
| 1 | 5.04 | 4.93 | 17.18 | 1.77 |
| 1 | 5.04 | 4.93 | 17.18 | 1.77 |
| 1 | 5.04 | 4.93 | 17.18 | 1.77 |
| 1 | 5.04 | 4.93 | 17.18 | 1.77 |
| 1 | 5.04 | 4.93 | 17.18 | 1.77 |
| 1 | 5.04 | 4.94 | 17.18 | 1.77 |
| 1 | 5.04 | 4.93 | 17.18 | 1.77 |
| 1 | 5.04 | 4.93 | 17.18 | 1.77 |
| 1 | 5.04 | 4.93 | 17.18 | 1.77 |

|   |      |      |       |      |
|---|------|------|-------|------|
| 1 | 5.04 | 4.93 | 17.18 | 1.77 |
| 1 | 5.04 | 4.93 | 17.18 | 1.77 |
| 1 | 5.04 | 4.94 | 17.18 | 1.77 |
| 1 | 5.04 | 4.94 | 17.18 | 1.77 |
| 1 | 5.04 | 4.93 | 17.18 | 1.77 |
| 1 | 5.04 | 4.93 | 17.18 | 1.77 |
| 1 | 5.04 | 4.93 | 17.18 | 1.77 |
| 1 | 5.04 | 4.94 | 17.18 | 1.77 |
| 1 | 5.04 | 4.93 | 17.18 | 1.77 |
| 1 | 5.04 | 4.93 | 17.18 | 1.77 |
| 1 | 5.04 | 4.93 | 17.18 | 1.77 |
| 1 | 5.04 | 4.93 | 17.18 | 1.77 |
| 1 | 5.04 | 4.93 | 17.18 | 1.77 |
| 1 | 5.04 | 4.93 | 17.18 | 1.77 |
| 1 | 5.04 | 4.93 | 17.18 | 1.77 |
| 1 | 5.04 | 4.94 | 17.18 | 1.77 |
| 1 | 5.04 | 4.93 | 17.18 | 1.77 |
| 1 | 5.04 | 4.93 | 17.18 | 1.77 |
| 1 | 5.04 | 4.93 | 17.18 | 1.77 |
| 1 | 5.04 | 4.93 | 17.18 | 1.77 |
| 1 | 5.04 | 4.93 | 17.18 | 1.77 |
| 1 | 5.04 | 4.93 | 17.18 | 1.77 |
| 1 | 5.04 | 4.93 | 17.18 | 1.77 |
| 1 | 5.04 | 4.94 | 17.18 | 1.77 |
| 1 | 5.04 | 4.93 | 17.18 | 1.77 |
| 1 | 5.04 | 4.93 | 17.18 | 1.77 |
| 1 | 5.04 | 4.93 | 17.18 | 1.77 |
| 1 | 5.04 | 4.93 | 17.18 | 1.77 |
| 1 | 5.04 | 4.93 | 17.18 | 1.77 |
| 1 | 5.04 | 4.93 | 17.18 | 1.77 |
| 1 | 5.04 | 4.93 | 17.18 | 1.77 |
| 1 | 5.04 | 4.93 | 17.18 | 1.77 |
| 1 | 5.04 | 4.94 | 17.18 | 1.77 |
| 1 | 5.04 | 4.93 | 17.18 | 1.77 |
| 1 | 5.04 | 4.93 | 17.18 | 1.77 |
| 1 | 5.04 | 4.93 | 17.18 | 1.77 |

|   |      |      |       |      |
|---|------|------|-------|------|
| 1 | 5.04 | 4.93 | 17.18 | 1.77 |
| 1 | 5.04 | 4.93 | 17.18 | 1.77 |
| 1 | 5.04 | 4.93 | 17.18 | 1.77 |
| 1 | 5.04 | 4.93 | 17.18 | 1.77 |
| 1 | 5.04 | 4.93 | 17.18 | 1.77 |
| 1 | 5.04 | 4.94 | 17.18 | 1.77 |
| 1 | 5.04 | 4.93 | 17.18 | 1.77 |
| 1 | 5.04 | 4.93 | 17.18 | 1.77 |
| 1 | 5.04 | 4.93 | 17.18 | 1.77 |
| 1 | 5.04 | 4.93 | 17.18 | 1.77 |
| 1 | 5.04 | 4.93 | 17.18 | 1.77 |
| 1 | 5.04 | 4.93 | 17.18 | 1.77 |
| 1 | 5.04 | 4.93 | 17.18 | 1.77 |
| 1 | 5.04 | 4.93 | 17.18 | 1.77 |
| 1 | 5.04 | 4.94 | 17.18 | 1.77 |
| 1 | 5.04 | 4.93 | 17.18 | 1.77 |
| 1 | 5.04 | 4.93 | 17.18 | 1.77 |
| 1 | 5.04 | 4.94 | 17.18 | 1.77 |
| 1 | 5.04 | 4.93 | 17.18 | 1.77 |
| 1 | 5.04 | 4.93 | 17.18 | 1.77 |
| 1 | 5.04 | 4.93 | 17.18 | 1.77 |
| 1 | 5.04 | 4.93 | 17.18 | 1.77 |
| 1 | 5.04 | 4.93 | 17.18 | 1.77 |
| 1 | 5.04 | 4.94 | 17.18 | 1.77 |
| 1 | 5.04 | 4.93 | 17.18 | 1.77 |
| 1 | 5.04 | 4.93 | 17.18 | 1.77 |
| 1 | 5.04 | 4.93 | 17.18 | 1.77 |
| 1 | 5.04 | 4.94 | 17.18 | 1.77 |
| 1 | 5.04 | 4.93 | 17.18 | 1.77 |
| 1 | 5.04 | 4.93 | 17.18 | 1.77 |
| 1 | 5.04 | 4.94 | 17.18 | 1.77 |
| 1 | 5.04 | 4.94 | 17.18 | 1.77 |
| 1 | 5.04 | 4.93 | 17.18 | 1.77 |

|   |      |      |       |      |
|---|------|------|-------|------|
| 1 | 5.04 | 4.93 | 17.18 | 1.77 |
| 1 | 5.04 | 4.94 | 17.18 | 1.77 |
| 1 | 5.04 | 4.93 | 17.18 | 1.77 |
| 1 | 5.04 | 4.93 | 17.18 | 1.77 |
| 1 | 5.04 | 4.94 | 17.18 | 1.77 |
| 1 | 5.04 | 4.93 | 17.18 | 1.77 |
| 1 | 5.04 | 4.94 | 17.18 | 1.77 |
| 1 | 5.04 | 4.93 | 17.18 | 1.77 |
| 1 | 5.04 | 4.93 | 17.18 | 1.77 |
| 1 | 5.04 | 4.93 | 17.18 | 1.77 |
| 1 | 5.04 | 4.93 | 17.18 | 1.77 |
| 1 | 5.04 | 4.93 | 17.18 | 1.77 |
| 1 | 5.04 | 4.93 | 17.18 | 1.77 |
| 1 | 5.04 | 4.94 | 17.18 | 1.77 |
| 1 | 5.04 | 4.93 | 17.18 | 1.77 |
| 1 | 5.04 | 4.94 | 17.18 | 1.77 |
| 1 | 5.04 | 4.93 | 17.18 | 1.77 |
| 1 | 5.04 | 4.93 | 17.18 | 1.77 |
| 1 | 5.04 | 4.93 | 17.18 | 1.77 |
| 1 | 5.04 | 4.94 | 17.18 | 1.77 |
| 1 | 5.04 | 4.93 | 17.18 | 1.77 |
| 1 | 5.04 | 4.93 | 17.18 | 1.77 |
| 1 | 5.04 | 4.94 | 17.18 | 1.77 |
| 1 | 5.04 | 4.93 | 17.18 | 1.77 |
| 1 | 5.04 | 4.93 | 17.18 | 1.77 |
| 1 | 5.04 | 4.94 | 17.18 | 1.77 |
| 1 | 5.04 | 4.93 | 17.18 | 1.77 |
| 1 | 5.04 | 4.93 | 17.18 | 1.77 |
| 1 | 5.04 | 4.94 | 17.18 | 1.77 |
| 1 | 5.04 | 4.93 | 17.18 | 1.77 |
| 1 | 5.04 | 4.93 | 17.18 | 1.77 |
| 1 | 5.04 | 4.94 | 17.18 | 1.77 |
| 1 | 5.04 | 4.93 | 17.18 | 1.77 |
| 1 | 5.04 | 4.93 | 17.18 | 1.77 |
| 1 | 5.04 | 4.94 | 17.18 | 1.77 |
| 1 | 5.04 | 4.93 | 17.18 | 1.77 |
| 1 | 5.04 | 4.93 | 17.18 | 1.77 |
| 1 | 5.04 | 4.93 | 17.18 | 1.77 |



|   |      |      |       |      |
|---|------|------|-------|------|
| 1 | 5.04 | 4.94 | 17.18 | 1.77 |
| 1 | 5.04 | 4.93 | 17.18 | 1.77 |
| 1 | 5.04 | 4.93 | 17.18 | 1.77 |
| 1 | 5.04 | 4.93 | 17.18 | 1.77 |
| 1 | 5.04 | 4.93 | 17.18 | 1.77 |
| 1 | 5.04 | 4.93 | 17.18 | 1.77 |
| 1 | 5.04 | 4.93 | 17.18 | 1.77 |
| 1 | 5.04 | 4.93 | 17.18 | 1.77 |
| 1 | 5.04 | 4.93 | 17.18 | 1.77 |
| 1 | 5.04 | 4.93 | 17.18 | 1.77 |
| 1 | 5.04 | 4.93 | 17.18 | 1.77 |
| 1 | 5.04 | 4.93 | 17.18 | 1.77 |
| 1 | 5.04 | 4.93 | 17.18 | 1.77 |
| 1 | 5.04 | 4.94 | 17.18 | 1.77 |
| 1 | 5.04 | 4.93 | 17.18 | 1.77 |
| 1 | 5.04 | 4.93 | 17.18 | 1.77 |
| 1 | 5.04 | 4.94 | 17.18 | 1.77 |
| 1 | 5.04 | 4.93 | 17.18 | 1.77 |
| 1 | 5.04 | 4.93 | 17.18 | 1.77 |
| 1 | 5.04 | 4.93 | 17.18 | 1.77 |
| 1 | 5.04 | 4.93 | 17.18 | 1.77 |
| 1 | 5.04 | 4.93 | 17.18 | 1.77 |
| 1 | 5.04 | 4.93 | 17.18 | 1.77 |
| 1 | 5.04 | 4.93 | 17.18 | 1.77 |
| 1 | 5.04 | 4.93 | 17.18 | 1.77 |
| 1 | 5.04 | 4.93 | 17.18 | 1.77 |
| 1 | 5.04 | 4.93 | 17.18 | 1.77 |
| 1 | 5.04 | 4.93 | 17.18 | 1.77 |
| 1 | 5.04 | 4.93 | 17.18 | 1.77 |
| 1 | 5.04 | 4.93 | 17.18 | 1.77 |
| 1 | 5.04 | 4.93 | 17.18 | 1.77 |
| 1 | 5.04 | 4.93 | 17.18 | 1.77 |
| 1 | 5.04 | 4.93 | 17.18 | 1.77 |
| 1 | 5.04 | 4.93 | 17.18 | 1.77 |
| 1 | 5.04 | 4.94 | 17.18 | 1.77 |
| 1 | 5.04 | 4.94 | 17.18 | 1.77 |
| 1 | 5.04 | 4.93 | 17.18 | 1.77 |







|   |      |      |       |      |
|---|------|------|-------|------|
| 1 | 5.04 | 4.93 | 17.18 | 1.77 |
| 1 | 5.04 | 4.94 | 17.18 | 1.77 |
| 1 | 5.04 | 4.93 | 17.18 | 1.77 |
| 1 | 5.04 | 4.93 | 17.18 | 1.77 |
| 1 | 5.04 | 4.93 | 17.18 | 1.77 |
| 1 | 5.04 | 4.93 | 17.18 | 1.77 |
| 1 | 5.04 | 4.93 | 17.18 | 1.77 |
| 1 | 5.04 | 4.93 | 17.18 | 1.77 |
| 1 | 5.04 | 4.93 | 17.18 | 1.77 |
| 1 | 5.04 | 4.94 | 17.18 | 1.77 |
| 1 | 5.04 | 4.93 | 17.18 | 1.77 |
| 1 | 5.04 | 4.93 | 17.18 | 1.77 |
| 1 | 5.04 | 4.93 | 17.18 | 1.77 |
| 1 | 5.04 | 4.93 | 17.18 | 1.77 |
| 1 | 5.04 | 4.93 | 17.18 | 1.77 |
| 1 | 5.04 | 4.93 | 17.18 | 1.77 |
| 1 | 5.04 | 4.94 | 17.18 | 1.77 |
| 1 | 5.04 | 4.93 | 17.18 | 1.77 |
| 1 | 5.04 | 4.93 | 17.18 | 1.77 |
| 1 | 5.04 | 4.93 | 17.18 | 1.77 |
| 1 | 5.04 | 4.93 | 17.18 | 1.77 |
| 1 | 5.04 | 4.93 | 17.18 | 1.77 |
| 1 | 5.04 | 4.93 | 17.18 | 1.77 |
| 1 | 5.04 | 4.94 | 17.18 | 1.77 |
| 1 | 5.04 | 4.93 | 17.18 | 1.77 |
| 1 | 5.04 | 4.93 | 17.18 | 1.77 |
| 1 | 5.04 | 4.93 | 17.18 | 1.77 |
| 1 | 5.04 | 4.93 | 17.18 | 1.77 |
| 1 | 5.04 | 4.94 | 17.18 | 1.77 |
| 1 | 5.04 | 4.93 | 17.18 | 1.77 |
| 1 | 5.04 | 4.93 | 17.18 | 1.77 |
| 1 | 5.04 | 4.94 | 17.18 | 1.77 |
| 1 | 5.04 | 4.93 | 17.18 | 1.77 |
| 1 | 5.04 | 4.93 | 17.18 | 1.77 |
| 1 | 5.04 | 4.93 | 17.18 | 1.77 |
| 1 | 5.04 | 4.93 | 17.18 | 1.77 |
| 1 | 5.04 | 4.94 | 17.18 | 1.77 |
| 1 | 5.04 | 4.93 | 17.18 | 1.77 |
| 1 | 5.04 | 4.93 | 17.18 | 1.77 |



|   |      |      |       |      |
|---|------|------|-------|------|
| 1 | 5.04 | 4.93 | 17.18 | 1.77 |
| 1 | 5.04 | 4.93 | 17.18 | 1.77 |
| 1 | 5.04 | 4.93 | 17.18 | 1.77 |
| 1 | 5.04 | 4.93 | 17.18 | 1.77 |
| 1 | 5.04 | 4.93 | 17.18 | 1.77 |
| 1 | 5.04 | 4.93 | 17.18 | 1.77 |
| 1 | 5.04 | 4.93 | 17.18 | 1.77 |
| 1 | 5.04 | 4.94 | 17.18 | 1.77 |
| 1 | 5.04 | 4.94 | 17.18 | 1.77 |
| 1 | 5.04 | 4.93 | 17.18 | 1.77 |
| 1 | 5.04 | 4.93 | 17.18 | 1.77 |
| 1 | 5.04 | 4.93 | 17.18 | 1.77 |
| 1 | 5.04 | 4.93 | 17.18 | 1.77 |
| 1 | 5.04 | 4.94 | 17.18 | 1.77 |
| 1 | 5.04 | 4.93 | 17.18 | 1.77 |
| 1 | 5.04 | 4.93 | 17.18 | 1.77 |
| 1 | 5.04 | 4.94 | 17.18 | 1.77 |
| 1 | 5.04 | 4.93 | 17.18 | 1.77 |
| 1 | 5.04 | 4.93 | 17.18 | 1.77 |
| 1 | 5.04 | 4.93 | 17.18 | 1.77 |
| 1 | 5.04 | 4.93 | 17.18 | 1.77 |
| 1 | 5.04 | 4.93 | 17.18 | 1.77 |
| 1 | 5.04 | 4.93 | 17.18 | 1.77 |
| 1 | 5.04 | 4.93 | 17.18 | 1.77 |
| 1 | 5.04 | 4.93 | 17.18 | 1.77 |
| 1 | 5.04 | 4.93 | 17.18 | 1.77 |
| 1 | 5.04 | 4.93 | 17.18 | 1.77 |
| 1 | 5.04 | 4.93 | 17.18 | 1.77 |
| 1 | 5.04 | 4.93 | 17.18 | 1.77 |
| 1 | 5.04 | 4.93 | 17.18 | 1.77 |
| 1 | 5.04 | 4.93 | 17.18 | 1.77 |
| 1 | 5.04 | 4.93 | 17.18 | 1.77 |
| 1 | 5.04 | 4.93 | 17.18 | 1.77 |
| 1 | 5.04 | 4.93 | 17.18 | 1.77 |
| 1 | 5.04 | 4.93 | 17.18 | 1.77 |
| 1 | 5.04 | 4.94 | 17.18 | 1.77 |
| 1 | 5.04 | 4.93 | 17.18 | 1.77 |





|   |      |      |       |      |
|---|------|------|-------|------|
| 1 | 5.04 | 4.93 | 17.18 | 1.77 |
| 1 | 5.04 | 4.93 | 17.18 | 1.77 |
| 1 | 5.04 | 4.93 | 17.18 | 1.77 |
| 1 | 5.04 | 4.94 | 17.18 | 1.77 |
| 1 | 5.04 | 4.93 | 17.18 | 1.77 |
| 1 | 5.04 | 4.94 | 17.18 | 1.77 |
| 1 | 5.04 | 4.93 | 17.18 | 1.77 |
| 1 | 5.04 | 4.93 | 17.18 | 1.77 |
| 1 | 5.04 | 4.93 | 17.18 | 1.77 |
| 1 | 5.04 | 4.94 | 17.18 | 1.77 |
| 1 | 5.04 | 4.93 | 17.18 | 1.77 |
| 1 | 5.04 | 4.93 | 17.18 | 1.77 |
| 1 | 5.04 | 4.93 | 17.18 | 1.77 |
| 1 | 5.04 | 4.93 | 17.18 | 1.77 |
| 1 | 5.04 | 4.93 | 17.18 | 1.77 |
| 1 | 5.04 | 4.93 | 17.18 | 1.77 |
| 1 | 5.04 | 4.93 | 17.18 | 1.77 |
| 1 | 5.04 | 4.93 | 17.18 | 1.77 |
| 1 | 5.04 | 4.93 | 17.18 | 1.77 |
| 1 | 5.04 | 4.93 | 17.18 | 1.77 |
| 1 | 5.04 | 4.93 | 17.18 | 1.77 |
| 1 | 5.04 | 4.93 | 17.18 | 1.77 |
| 1 | 5.04 | 4.93 | 17.18 | 1.77 |
| 1 | 5.04 | 4.93 | 17.18 | 1.77 |
| 1 | 5.04 | 4.93 | 17.18 | 1.77 |
| 1 | 5.04 | 4.93 | 17.18 | 1.77 |
| 1 | 5.04 | 4.93 | 17.18 | 1.77 |
| 1 | 5.04 | 4.93 | 17.18 | 1.77 |
| 1 | 5.04 | 4.94 | 17.18 | 1.77 |
| 1 | 5.04 | 4.93 | 17.18 | 1.77 |
| 1 | 5.04 | 4.93 | 17.18 | 1.77 |
| 1 | 5.04 | 4.93 | 17.18 | 1.77 |
| 1 | 5.04 | 4.93 | 17.18 | 1.77 |
| 1 | 5.04 | 4.93 | 17.18 | 1.77 |
| 1 | 5.04 | 4.93 | 17.18 | 1.77 |
| 1 | 5.04 | 4.93 | 17.18 | 1.77 |
| 1 | 5.04 | 4.93 | 17.18 | 1.77 |
| 1 | 5.04 | 4.94 | 17.18 | 1.77 |
| 1 | 5.04 | 4.93 | 17.18 | 1.77 |

|   |      |      |       |      |
|---|------|------|-------|------|
| 1 | 5.04 | 4.94 | 17.18 | 1.77 |
| 1 | 5.04 | 4.93 | 17.18 | 1.77 |
| 1 | 5.04 | 4.93 | 17.18 | 1.77 |
| 1 | 5.04 | 4.93 | 17.18 | 1.77 |
| 1 | 5.04 | 4.93 | 17.18 | 1.77 |
| 1 | 5.04 | 4.93 | 17.18 | 1.77 |
| 1 | 5.04 | 4.94 | 17.18 | 1.77 |
| 1 | 5.04 | 4.93 | 17.18 | 1.77 |
| 1 | 5.04 | 4.93 | 17.18 | 1.77 |
| 1 | 5.04 | 4.93 | 17.18 | 1.77 |
| 1 | 5.04 | 4.94 | 17.18 | 1.77 |
| 1 | 5.04 | 4.93 | 17.18 | 1.77 |
| 1 | 5.04 | 4.93 | 17.18 | 1.77 |
| 1 | 5.04 | 4.94 | 17.18 | 1.77 |
| 1 | 5.04 | 4.93 | 17.18 | 1.77 |
| 1 | 5.04 | 4.93 | 17.18 | 1.77 |
| 1 | 5.04 | 4.93 | 17.18 | 1.77 |
| 1 | 5.04 | 4.94 | 17.18 | 1.77 |
| 1 | 5.04 | 4.93 | 17.18 | 1.77 |
| 1 | 5.04 | 4.93 | 17.18 | 1.77 |
| 1 | 5.04 | 4.93 | 17.18 | 1.77 |
| 1 | 5.04 | 4.94 | 17.18 | 1.77 |
| 1 | 5.04 | 4.93 | 17.18 | 1.77 |
| 1 | 5.04 | 4.93 | 17.18 | 1.77 |
| 1 | 5.04 | 4.94 | 17.18 | 1.77 |
| 1 | 5.04 | 4.93 | 17.18 | 1.77 |
| 1 | 5.04 | 4.93 | 17.18 | 1.77 |
| 1 | 5.04 | 4.94 | 17.18 | 1.77 |
| 1 | 5.04 | 4.93 | 17.18 | 1.77 |
| 1 | 5.04 | 4.93 | 17.18 | 1.77 |
| 1 | 5.04 | 4.94 | 17.18 | 1.77 |
| 1 | 5.04 | 4.93 | 17.18 | 1.77 |
| 1 | 5.04 | 4.94 | 17.18 | 1.77 |
| 1 | 5.04 | 4.93 | 17.18 | 1.77 |
| 1 | 5.04 | 4.93 | 17.18 | 1.77 |







|   |      |      |       |      |
|---|------|------|-------|------|
| 1 | 5.04 | 4.93 | 17.18 | 1.77 |
| 1 | 5.04 | 4.93 | 17.18 | 1.77 |
| 1 | 5.04 | 4.93 | 17.18 | 1.77 |
| 1 | 5.04 | 4.93 | 17.18 | 1.77 |
| 1 | 5.04 | 4.94 | 17.18 | 1.77 |
| 1 | 5.04 | 4.93 | 17.18 | 1.77 |
| 1 | 5.04 | 4.93 | 17.18 | 1.77 |
| 1 | 5.04 | 4.94 | 17.18 | 1.77 |
| 1 | 5.04 | 4.93 | 17.18 | 1.77 |
| 1 | 5.04 | 4.93 | 17.18 | 1.77 |
| 1 | 5.04 | 4.93 | 17.18 | 1.77 |
| 1 | 5.04 | 4.94 | 17.18 | 1.77 |
| 1 | 5.04 | 4.93 | 17.18 | 1.77 |
| 1 | 5.04 | 4.93 | 17.18 | 1.77 |
| 1 | 5.04 | 4.93 | 17.18 | 1.77 |
| 1 | 5.04 | 4.93 | 17.18 | 1.77 |
| 1 | 5.04 | 4.93 | 17.18 | 1.77 |
| 1 | 5.04 | 4.94 | 17.18 | 1.77 |
| 1 | 5.04 | 4.93 | 17.18 | 1.77 |
| 1 | 5.04 | 4.93 | 17.18 | 1.77 |
| 1 | 5.04 | 4.93 | 17.18 | 1.77 |
| 1 | 5.04 | 4.94 | 17.18 | 1.77 |
| 1 | 5.04 | 4.93 | 17.18 | 1.77 |
| 1 | 5.04 | 4.93 | 17.18 | 1.77 |
| 1 | 5.04 | 4.93 | 17.18 | 1.77 |
| 1 | 5.04 | 4.94 | 17.18 | 1.77 |
| 1 | 5.04 | 4.93 | 17.18 | 1.77 |
| 1 | 5.04 | 4.93 | 17.18 | 1.77 |
| 1 | 5.04 | 4.93 | 17.18 | 1.77 |
| 1 | 5.04 | 4.93 | 17.18 | 1.77 |
| 1 | 5.04 | 4.94 | 17.18 | 1.77 |
| 1 | 5.04 | 4.93 | 17.18 | 1.77 |
| 1 | 5.04 | 4.93 | 17.18 | 1.77 |
| 1 | 5.04 | 4.93 | 17.18 | 1.77 |
| 1 | 5.04 | 4.94 | 17.18 | 1.77 |
| 1 | 5.04 | 4.93 | 17.18 | 1.77 |
| 1 | 5.04 | 4.93 | 17.18 | 1.77 |
| 1 | 5.04 | 4.93 | 17.18 | 1.77 |
| 1 | 5.04 | 4.94 | 17.18 | 1.77 |
| 1 | 5.04 | 4.93 | 17.18 | 1.77 |



|   |      |      |       |      |
|---|------|------|-------|------|
| 1 | 5.04 | 4.94 | 17.18 | 1.77 |
| 1 | 5.04 | 4.94 | 17.18 | 1.77 |
| 1 | 5.04 | 4.93 | 17.18 | 1.77 |
| 1 | 5.04 | 4.93 | 17.18 | 1.77 |
| 1 | 5.04 | 4.93 | 17.18 | 1.77 |
| 1 | 5.04 | 4.93 | 17.18 | 1.77 |
| 1 | 5.04 | 4.93 | 17.18 | 1.77 |
| 1 | 5.04 | 4.93 | 17.18 | 1.77 |
| 1 | 5.04 | 4.94 | 17.18 | 1.77 |
| 1 | 5.04 | 4.93 | 17.18 | 1.77 |
| 1 | 5.04 | 4.94 | 17.18 | 1.77 |
| 1 | 5.04 | 4.94 | 17.18 | 1.77 |
| 1 | 5.04 | 4.93 | 17.18 | 1.77 |
| 1 | 5.04 | 4.93 | 17.18 | 1.77 |
| 1 | 5.04 | 4.93 | 17.18 | 1.77 |
| 1 | 5.04 | 4.93 | 17.18 | 1.77 |
| 1 | 5.04 | 4.93 | 17.18 | 1.77 |
| 1 | 5.04 | 4.93 | 17.18 | 1.77 |
| 1 | 5.04 | 4.93 | 17.18 | 1.77 |
| 1 | 5.04 | 4.94 | 17.18 | 1.77 |
| 1 | 5.04 | 4.93 | 17.18 | 1.77 |
| 1 | 5.04 | 4.93 | 17.18 | 1.77 |
| 1 | 5.04 | 4.93 | 17.18 | 1.77 |
| 1 | 5.04 | 4.94 | 17.18 | 1.77 |
| 1 | 5.04 | 4.93 | 17.18 | 1.77 |
| 1 | 5.04 | 4.93 | 17.18 | 1.77 |
| 1 | 5.04 | 4.93 | 17.18 | 1.77 |
| 1 | 5.04 | 4.94 | 17.18 | 1.77 |
| 1 | 5.04 | 4.93 | 17.18 | 1.77 |
| 1 | 5.04 | 4.93 | 17.18 | 1.77 |
| 1 | 5.04 | 4.93 | 17.18 | 1.77 |
| 1 | 5.04 | 4.94 | 17.18 | 1.77 |
| 1 | 5.04 | 4.93 | 17.18 | 1.77 |
| 1 | 5.04 | 4.93 | 17.18 | 1.77 |
| 1 | 5.04 | 4.93 | 17.18 | 1.77 |
| 1 | 5.04 | 4.93 | 17.18 | 1.77 |
| 1 | 5.04 | 4.93 | 17.18 | 1.77 |
| 1 | 5.04 | 4.94 | 17.18 | 1.77 |
| 1 | 5.04 | 4.93 | 17.18 | 1.77 |
| 1 | 5.04 | 4.93 | 17.18 | 1.77 |
| 1 | 5.04 | 4.93 | 17.18 | 1.77 |



|   |      |      |       |      |
|---|------|------|-------|------|
| 1 | 5.04 | 4.93 | 17.18 | 1.77 |
| 1 | 5.04 | 4.93 | 17.18 | 1.77 |
| 1 | 5.04 | 4.93 | 17.18 | 1.77 |
| 1 | 5.04 | 4.93 | 17.18 | 1.77 |
| 1 | 5.04 | 4.94 | 17.18 | 1.77 |
| 1 | 5.04 | 4.93 | 17.18 | 1.77 |
| 1 | 5.04 | 4.94 | 17.18 | 1.77 |
| 1 | 5.04 | 4.93 | 17.18 | 1.77 |
| 1 | 5.04 | 4.94 | 17.18 | 1.77 |
| 1 | 5.04 | 4.94 | 17.18 | 1.77 |
| 1 | 5.04 | 4.93 | 17.18 | 1.77 |
| 1 | 5.04 | 4.93 | 17.18 | 1.77 |
| 1 | 5.04 | 4.94 | 17.18 | 1.77 |
| 1 | 5.04 | 4.93 | 17.18 | 1.77 |
| 1 | 5.04 | 4.94 | 17.18 | 1.77 |
| 1 | 5.04 | 4.93 | 17.18 | 1.77 |
| 1 | 5.04 | 4.94 | 17.18 | 1.77 |
| 1 | 5.04 | 4.94 | 17.18 | 1.77 |
| 1 | 5.04 | 4.93 | 17.18 | 1.77 |
| 1 | 5.04 | 4.93 | 17.18 | 1.77 |
| 1 | 5.04 | 4.94 | 17.18 | 1.77 |
| 1 | 5.04 | 4.94 | 17.18 | 1.77 |
| 1 | 5.04 | 4.93 | 17.18 | 1.77 |
| 1 | 5.04 | 4.93 | 17.18 | 1.77 |
| 1 | 5.04 | 4.94 | 17.18 | 1.77 |
| 1 | 5.04 | 4.93 | 17.18 | 1.77 |
| 1 | 5.04 | 4.93 | 17.18 | 1.77 |
| 1 | 5.04 | 4.93 | 17.18 | 1.77 |
| 1 | 5.04 | 4.94 | 17.18 | 1.77 |
| 1 | 5.04 | 4.93 | 17.18 | 1.77 |
| 1 | 5.04 | 4.93 | 17.18 | 1.77 |
| 1 | 5.04 | 4.93 | 17.18 | 1.77 |
| 1 | 5.04 | 4.93 | 17.18 | 1.77 |
| 1 | 5.04 | 4.93 | 17.18 | 1.77 |
| 1 | 5.04 | 4.94 | 17.18 | 1.77 |

|   |      |      |       |      |
|---|------|------|-------|------|
| 1 | 5.04 | 4.93 | 17.18 | 1.77 |
| 1 | 5.04 | 4.93 | 17.18 | 1.77 |
| 1 | 5.04 | 4.94 | 17.18 | 1.77 |
| 1 | 5.04 | 4.93 | 17.18 | 1.77 |
| 1 | 5.04 | 4.94 | 17.18 | 1.77 |
| 1 | 5.04 | 4.93 | 17.18 | 1.77 |
| 1 | 5.04 | 4.93 | 17.18 | 1.77 |
| 1 | 5.04 | 4.93 | 17.18 | 1.77 |
| 1 | 5.04 | 4.93 | 17.18 | 1.77 |
| 1 | 5.04 | 4.93 | 17.18 | 1.77 |
| 1 | 5.04 | 4.94 | 17.18 | 1.77 |
| 1 | 5.04 | 4.93 | 17.18 | 1.77 |
| 1 | 5.04 | 4.93 | 17.18 | 1.77 |
| 1 | 5.04 | 4.93 | 17.18 | 1.77 |
| 1 | 5.04 | 4.93 | 17.18 | 1.77 |
| 1 | 5.04 | 4.94 | 17.18 | 1.77 |
| 1 | 5.04 | 4.93 | 17.18 | 1.77 |
| 1 | 5.04 | 4.94 | 17.18 | 1.77 |
| 1 | 5.04 | 4.93 | 17.18 | 1.77 |
| 1 | 5.04 | 4.93 | 17.18 | 1.77 |
| 1 | 5.04 | 4.93 | 17.18 | 1.77 |
| 1 | 5.04 | 4.93 | 17.18 | 1.77 |
| 1 | 5.04 | 4.93 | 17.18 | 1.77 |
| 1 | 5.04 | 4.93 | 17.18 | 1.77 |
| 1 | 5.04 | 4.93 | 17.18 | 1.77 |
| 1 | 5.04 | 4.93 | 17.18 | 1.77 |
| 1 | 5.04 | 4.94 | 17.18 | 1.77 |
| 1 | 5.04 | 4.93 | 17.18 | 1.77 |
| 1 | 5.04 | 4.93 | 17.18 | 1.77 |
| 1 | 5.04 | 4.93 | 17.18 | 1.77 |
| 1 | 5.04 | 4.94 | 17.18 | 1.77 |
| 1 | 5.04 | 4.93 | 17.18 | 1.77 |
| 1 | 5.04 | 4.93 | 17.18 | 1.77 |
| 1 | 5.04 | 4.94 | 17.18 | 1.77 |
| 1 | 5.04 | 4.93 | 17.18 | 1.77 |
| 1 | 5.04 | 4.93 | 17.18 | 1.77 |





|   |      |      |       |      |
|---|------|------|-------|------|
| 1 | 5.04 | 4.93 | 17.18 | 1.77 |
| 1 | 5.04 | 4.93 | 17.18 | 1.77 |
| 1 | 5.04 | 4.93 | 17.18 | 1.77 |
| 1 | 5.04 | 4.93 | 17.18 | 1.77 |
| 1 | 5.04 | 4.94 | 17.18 | 1.77 |
| 1 | 5.04 | 4.93 | 17.18 | 1.77 |
| 1 | 5.04 | 4.94 | 17.18 | 1.77 |
| 1 | 5.04 | 4.93 | 17.18 | 1.77 |
| 1 | 5.04 | 4.94 | 17.18 | 1.77 |
| 1 | 5.04 | 4.93 | 17.18 | 1.77 |
| 1 | 5.04 | 4.93 | 17.18 | 1.77 |
| 1 | 5.04 | 4.93 | 17.18 | 1.77 |
| 1 | 5.04 | 4.93 | 17.18 | 1.77 |
| 1 | 5.04 | 4.93 | 17.18 | 1.77 |
| 1 | 5.04 | 4.93 | 17.18 | 1.77 |
| 1 | 5.04 | 4.93 | 17.18 | 1.77 |
| 1 | 5.04 | 4.93 | 17.18 | 1.77 |
| 1 | 5.04 | 4.93 | 17.18 | 1.77 |
| 1 | 5.04 | 4.93 | 17.18 | 1.77 |
| 1 | 5.04 | 4.94 | 17.18 | 1.77 |
| 1 | 5.04 | 4.93 | 17.18 | 1.77 |
| 1 | 5.04 | 4.93 | 17.18 | 1.77 |
| 1 | 5.04 | 4.93 | 17.18 | 1.77 |
| 1 | 5.04 | 4.93 | 17.18 | 1.77 |
| 1 | 5.04 | 4.93 | 17.18 | 1.77 |
| 1 | 5.04 | 4.93 | 17.18 | 1.77 |
| 1 | 5.04 | 4.93 | 17.18 | 1.77 |
| 1 | 5.04 | 4.93 | 17.18 | 1.77 |
| 1 | 5.04 | 4.93 | 17.18 | 1.77 |
| 1 | 5.04 | 4.93 | 17.18 | 1.77 |
| 1 | 5.04 | 4.93 | 17.18 | 1.77 |
| 1 | 5.04 | 4.93 | 17.18 | 1.77 |
| 1 | 5.04 | 4.93 | 17.18 | 1.77 |
| 1 | 5.04 | 4.93 | 17.18 | 1.77 |
| 1 | 5.04 | 4.93 | 17.18 | 1.77 |
| 1 | 5.04 | 4.93 | 17.18 | 1.77 |
| 1 | 5.04 | 4.93 | 17.18 | 1.77 |
| 1 | 5.04 | 4.93 | 17.18 | 1.77 |
| 1 | 5.04 | 4.94 | 17.18 | 1.77 |
| 1 | 5.04 | 4.93 | 17.18 | 1.77 |
| 1 | 5.04 | 4.93 | 17.18 | 1.77 |
| 1 | 5.04 | 4.93 | 17.18 | 1.77 |
| 1 | 5.04 | 4.93 | 17.18 | 1.77 |
| 1 | 5.04 | 4.94 | 17.18 | 1.77 |

|   |      |      |       |      |
|---|------|------|-------|------|
| 1 | 5.04 | 4.93 | 17.18 | 1.77 |
| 1 | 5.04 | 4.93 | 17.18 | 1.77 |
| 1 | 5.04 | 4.93 | 17.18 | 1.77 |
| 1 | 5.04 | 4.93 | 17.18 | 1.77 |
| 1 | 5.04 | 4.93 | 17.18 | 1.77 |
| 1 | 5.04 | 4.94 | 17.18 | 1.77 |
| 1 | 5.04 | 4.93 | 17.18 | 1.77 |
| 1 | 5.04 | 4.93 | 17.18 | 1.77 |
| 1 | 5.04 | 4.93 | 17.18 | 1.77 |
| 1 | 5.04 | 4.93 | 17.18 | 1.77 |
| 1 | 5.04 | 4.93 | 17.18 | 1.77 |
| 1 | 5.04 | 4.94 | 17.18 | 1.77 |
| 1 | 5.04 | 4.93 | 17.18 | 1.77 |
| 1 | 5.04 | 4.93 | 17.18 | 1.77 |
| 1 | 5.04 | 4.93 | 17.18 | 1.77 |
| 1 | 5.04 | 4.94 | 17.18 | 1.77 |
| 1 | 5.04 | 4.93 | 17.18 | 1.77 |
| 1 | 5.04 | 4.94 | 17.18 | 1.77 |
| 1 | 5.04 | 4.93 | 17.18 | 1.77 |
| 1 | 5.04 | 4.93 | 17.18 | 1.77 |
| 1 | 5.04 | 4.93 | 17.18 | 1.77 |
| 1 | 5.04 | 4.93 | 17.18 | 1.77 |
| 1 | 5.04 | 4.93 | 17.18 | 1.77 |
| 1 | 5.04 | 4.93 | 17.18 | 1.77 |
| 1 | 5.04 | 4.93 | 17.18 | 1.77 |
| 1 | 5.04 | 4.93 | 17.18 | 1.77 |
| 1 | 5.04 | 4.93 | 17.18 | 1.77 |
| 1 | 5.04 | 4.93 | 17.18 | 1.77 |
| 1 | 5.04 | 4.93 | 17.18 | 1.77 |
| 1 | 5.04 | 4.93 | 17.18 | 1.77 |
| 1 | 5.04 | 4.94 | 17.18 | 1.77 |
| 1 | 5.04 | 4.93 | 17.18 | 1.77 |
| 1 | 5.04 | 4.93 | 17.18 | 1.77 |
| 1 | 5.04 | 4.93 | 17.18 | 1.77 |
| 1 | 5.04 | 4.93 | 17.18 | 1.77 |
| 1 | 5.04 | 4.93 | 17.18 | 1.77 |
| 1 | 5.04 | 4.94 | 17.18 | 1.77 |
| 1 | 5.04 | 4.93 | 17.18 | 1.77 |
| 1 | 5.04 | 4.93 | 17.18 | 1.77 |
| 1 | 5.04 | 4.93 | 17.18 | 1.77 |
| 1 | 5.04 | 4.94 | 17.18 | 1.77 |



|   |      |      |       |      |
|---|------|------|-------|------|
| 1 | 5.04 | 4.94 | 17.18 | 1.77 |
| 1 | 5.04 | 4.93 | 17.18 | 1.77 |
| 1 | 5.04 | 4.94 | 17.18 | 1.77 |
| 1 | 5.04 | 4.93 | 17.18 | 1.77 |
| 1 | 5.04 | 4.93 | 17.18 | 1.77 |
| 1 | 5.04 | 4.93 | 17.18 | 1.77 |
| 1 | 5.04 | 4.93 | 17.18 | 1.77 |
| 1 | 5.04 | 4.93 | 17.18 | 1.77 |
| 1 | 5.04 | 4.94 | 17.18 | 1.77 |
| 1 | 5.04 | 4.93 | 17.18 | 1.77 |
| 1 | 5.04 | 4.93 | 17.18 | 1.77 |
| 1 | 5.04 | 4.93 | 17.18 | 1.77 |
| 1 | 5.04 | 4.93 | 17.18 | 1.77 |
| 1 | 5.04 | 4.93 | 17.18 | 1.77 |
| 1 | 5.04 | 4.93 | 17.18 | 1.77 |
| 1 | 5.04 | 4.93 | 17.18 | 1.77 |
| 1 | 5.04 | 4.93 | 17.18 | 1.77 |
| 1 | 5.04 | 4.93 | 17.18 | 1.77 |
| 1 | 5.04 | 4.93 | 17.18 | 1.77 |
| 1 | 5.04 | 4.93 | 17.18 | 1.77 |
| 1 | 5.04 | 4.93 | 17.18 | 1.77 |
| 1 | 5.04 | 4.93 | 17.18 | 1.77 |
| 1 | 5.04 | 4.93 | 17.18 | 1.77 |
| 1 | 5.04 | 4.93 | 17.18 | 1.77 |
| 1 | 5.04 | 4.94 | 17.18 | 1.77 |
| 1 | 5.04 | 4.93 | 17.18 | 1.77 |
| 1 | 5.04 | 4.93 | 17.18 | 1.77 |
| 1 | 5.04 | 4.93 | 17.18 | 1.77 |
| 1 | 5.04 | 4.93 | 17.18 | 1.77 |
| 1 | 5.04 | 4.93 | 17.18 | 1.77 |
| 1 | 5.04 | 4.93 | 17.18 | 1.77 |
| 1 | 5.04 | 4.94 | 17.18 | 1.77 |
| 1 | 5.04 | 4.94 | 17.18 | 1.77 |
| 1 | 5.04 | 4.93 | 17.18 | 1.77 |
| 1 | 5.04 | 4.93 | 17.18 | 1.77 |
| 1 | 5.04 | 4.94 | 17.18 | 1.77 |
| 1 | 5.04 | 4.93 | 17.18 | 1.77 |



|   |      |      |       |      |
|---|------|------|-------|------|
| 1 | 5.04 | 4.93 | 17.18 | 1.77 |
| 1 | 5.04 | 4.93 | 17.18 | 1.77 |
| 1 | 5.04 | 4.94 | 17.18 | 1.77 |
| 1 | 5.04 | 4.93 | 17.18 | 1.77 |
| 1 | 5.04 | 4.93 | 17.18 | 1.77 |
| 1 | 5.04 | 4.93 | 17.18 | 1.77 |
| 1 | 5.04 | 4.93 | 17.18 | 1.77 |
| 1 | 5.04 | 4.93 | 17.18 | 1.77 |
| 1 | 5.04 | 4.93 | 17.18 | 1.77 |
| 1 | 5.04 | 4.93 | 17.18 | 1.77 |
| 1 | 5.04 | 4.93 | 17.18 | 1.77 |
| 1 | 5.04 | 4.93 | 17.18 | 1.77 |
| 1 | 5.04 | 4.93 | 17.18 | 1.77 |
| 1 | 5.04 | 4.93 | 17.18 | 1.77 |
| 1 | 5.04 | 4.93 | 17.18 | 1.77 |
| 1 | 5.04 | 4.93 | 17.18 | 1.77 |
| 1 | 5.04 | 4.94 | 17.18 | 1.77 |
| 1 | 5.04 | 4.93 | 17.18 | 1.77 |
| 1 | 5.04 | 4.93 | 17.18 | 1.77 |
| 1 | 5.04 | 4.93 | 17.18 | 1.77 |
| 1 | 5.04 | 4.93 | 17.18 | 1.77 |
| 1 | 5.04 | 4.93 | 17.18 | 1.77 |
| 1 | 5.04 | 4.93 | 17.18 | 1.77 |
| 1 | 5.04 | 4.93 | 17.18 | 1.77 |
| 1 | 5.04 | 4.93 | 17.18 | 1.77 |
| 1 | 5.04 | 4.94 | 17.18 | 1.77 |
| 1 | 5.04 | 4.93 | 17.18 | 1.77 |
| 1 | 5.04 | 4.93 | 17.18 | 1.77 |
| 1 | 5.04 | 4.93 | 17.18 | 1.77 |
| 1 | 5.04 | 4.94 | 17.18 | 1.77 |
| 1 | 5.04 | 4.93 | 17.18 | 1.77 |
| 1 | 5.04 | 4.93 | 17.18 | 1.77 |
| 1 | 5.04 | 4.93 | 17.18 | 1.77 |
| 1 | 5.04 | 4.93 | 17.18 | 1.77 |
| 1 | 5.04 | 4.94 | 17.18 | 1.77 |
| 1 | 5.04 | 4.93 | 17.18 | 1.77 |
| 1 | 5.04 | 4.93 | 17.18 | 1.77 |
| 1 | 5.04 | 4.93 | 17.18 | 1.77 |













|   |      |      |       |      |
|---|------|------|-------|------|
| 1 | 5.04 | 4.93 | 17.18 | 1.77 |
| 1 | 5.04 | 4.93 | 17.18 | 1.77 |
| 1 | 5.04 | 4.93 | 17.18 | 1.77 |
| 1 | 5.04 | 4.93 | 17.18 | 1.77 |
| 1 | 5.04 | 4.93 | 17.18 | 1.77 |
| 1 | 5.04 | 4.93 | 17.18 | 1.77 |
| 1 | 5.04 | 4.93 | 17.18 | 1.77 |
| 1 | 5.04 | 4.93 | 17.18 | 1.77 |
| 1 | 5.04 | 4.93 | 17.18 | 1.77 |
| 1 | 5.04 | 4.94 | 17.18 | 1.77 |
| 1 | 5.04 | 4.94 | 17.18 | 1.77 |
| 1 | 5.04 | 4.93 | 17.18 | 1.77 |
| 1 | 5.04 | 4.93 | 17.18 | 1.77 |
| 1 | 5.04 | 4.93 | 17.18 | 1.77 |
| 1 | 5.04 | 4.93 | 17.18 | 1.77 |
| 1 | 5.04 | 4.93 | 17.18 | 1.77 |
| 1 | 5.04 | 4.94 | 17.18 | 1.77 |
| 1 | 5.04 | 4.94 | 17.18 | 1.77 |
| 1 | 5.04 | 4.93 | 17.18 | 1.77 |
| 1 | 5.04 | 4.94 | 17.18 | 1.77 |
| 1 | 5.04 | 4.93 | 17.18 | 1.77 |
| 1 | 5.04 | 4.93 | 17.18 | 1.77 |
| 1 | 5.04 | 4.94 | 17.18 | 1.77 |
| 1 | 5.04 | 4.94 | 17.18 | 1.77 |
| 1 | 5.04 | 4.94 | 17.18 | 1.77 |
| 1 | 5.04 | 4.93 | 17.18 | 1.77 |
| 1 | 5.04 | 4.93 | 17.18 | 1.77 |
| 1 | 5.04 | 4.94 | 17.18 | 1.77 |
| 1 | 5.04 | 4.93 | 17.18 | 1.77 |
| 1 | 5.04 | 4.93 | 17.18 | 1.77 |
| 1 | 5.04 | 4.94 | 17.18 | 1.77 |
| 1 | 5.04 | 4.93 | 17.18 | 1.77 |
| 1 | 5.04 | 4.93 | 17.18 | 1.77 |
| 1 | 5.04 | 4.93 | 17.18 | 1.77 |





|   |      |      |       |      |
|---|------|------|-------|------|
| 1 | 5.04 | 4.93 | 17.18 | 1.77 |
| 1 | 5.04 | 4.93 | 17.18 | 1.77 |
| 1 | 5.04 | 4.93 | 17.18 | 1.77 |
| 1 | 5.04 | 4.93 | 17.18 | 1.77 |
| 1 | 5.04 | 4.93 | 17.18 | 1.77 |
| 1 | 5.04 | 4.94 | 17.18 | 1.77 |
| 1 | 5.04 | 4.93 | 17.18 | 1.77 |
| 1 | 5.04 | 4.93 | 17.18 | 1.77 |
| 1 | 5.04 | 4.93 | 17.18 | 1.77 |
| 1 | 5.04 | 4.93 | 17.18 | 1.77 |
| 1 | 5.04 | 4.93 | 17.18 | 1.77 |
| 1 | 5.04 | 4.93 | 17.18 | 1.77 |
| 1 | 5.04 | 4.93 | 17.18 | 1.77 |
| 1 | 5.04 | 4.93 | 17.18 | 1.77 |
| 1 | 5.04 | 4.93 | 17.18 | 1.77 |
| 1 | 5.04 | 4.94 | 17.18 | 1.77 |
| 1 | 5.04 | 4.93 | 17.18 | 1.77 |
| 1 | 5.04 | 4.94 | 17.18 | 1.77 |
| 1 | 5.04 | 4.93 | 17.18 | 1.77 |
| 1 | 5.04 | 4.93 | 17.18 | 1.77 |
| 1 | 5.04 | 4.94 | 17.18 | 1.77 |
| 1 | 5.04 | 4.93 | 17.18 | 1.77 |
| 1 | 5.04 | 4.93 | 17.18 | 1.77 |
| 1 | 5.04 | 4.93 | 17.18 | 1.77 |
| 1 | 5.04 | 4.94 | 17.18 | 1.77 |
| 1 | 5.04 | 4.94 | 17.18 | 1.77 |
| 1 | 5.04 | 4.93 | 17.18 | 1.77 |
| 1 | 5.04 | 4.93 | 17.18 | 1.77 |
| 1 | 5.04 | 4.93 | 17.18 | 1.77 |
| 1 | 5.04 | 4.94 | 17.18 | 1.77 |
| 1 | 5.04 | 4.93 | 17.18 | 1.77 |
| 1 | 5.04 | 4.93 | 17.18 | 1.77 |
| 1 | 5.04 | 4.94 | 17.18 | 1.77 |
| 1 | 5.04 | 4.93 | 17.18 | 1.77 |
| 1 | 5.04 | 4.93 | 17.18 | 1.77 |
| 1 | 5.04 | 4.94 | 17.18 | 1.77 |
| 1 | 5.04 | 4.93 | 17.18 | 1.77 |
| 1 | 5.04 | 4.93 | 17.18 | 1.77 |
| 1 | 5.04 | 4.94 | 17.18 | 1.77 |



|   |      |      |       |      |
|---|------|------|-------|------|
| 1 | 5.04 | 4.93 | 17.18 | 1.77 |
| 1 | 5.04 | 4.93 | 17.18 | 1.77 |
| 1 | 5.04 | 4.93 | 17.18 | 1.77 |
| 1 | 5.04 | 4.93 | 17.18 | 1.77 |
| 1 | 5.04 | 4.93 | 17.18 | 1.77 |
| 1 | 5.04 | 4.94 | 17.18 | 1.77 |
| 1 | 5.04 | 4.93 | 17.18 | 1.77 |
| 1 | 5.04 | 4.93 | 17.18 | 1.77 |
| 1 | 5.04 | 4.93 | 17.18 | 1.77 |
| 1 | 5.04 | 4.93 | 17.18 | 1.77 |
| 1 | 5.04 | 4.93 | 17.18 | 1.77 |
| 1 | 5.04 | 4.93 | 17.18 | 1.77 |
| 1 | 5.04 | 4.93 | 17.18 | 1.77 |
| 1 | 5.04 | 4.93 | 17.18 | 1.77 |
| 1 | 5.04 | 4.93 | 17.18 | 1.77 |
| 1 | 5.04 | 4.93 | 17.18 | 1.77 |
| 1 | 5.04 | 4.93 | 17.18 | 1.77 |
| 1 | 5.04 | 4.94 | 17.18 | 1.77 |
| 1 | 5.04 | 4.93 | 17.18 | 1.77 |
| 1 | 5.04 | 4.93 | 17.18 | 1.77 |
| 1 | 5.04 | 4.93 | 17.18 | 1.77 |
| 1 | 5.04 | 4.93 | 17.18 | 1.77 |
| 1 | 5.04 | 4.93 | 17.18 | 1.77 |
| 1 | 5.04 | 4.93 | 17.18 | 1.77 |
| 1 | 5.04 | 4.93 | 17.18 | 1.77 |
| 1 | 5.04 | 4.93 | 17.18 | 1.77 |
| 1 | 5.04 | 4.94 | 17.18 | 1.77 |
| 1 | 5.04 | 4.93 | 17.18 | 1.77 |
| 1 | 5.04 | 4.93 | 17.18 | 1.77 |
| 1 | 5.04 | 4.94 | 17.18 | 1.77 |
| 1 | 5.04 | 4.93 | 17.18 | 1.77 |
| 1 | 5.04 | 4.93 | 17.18 | 1.77 |
| 1 | 5.04 | 4.94 | 17.18 | 1.77 |
| 1 | 5.04 | 4.93 | 17.18 | 1.77 |
| 1 | 5.04 | 4.93 | 17.18 | 1.77 |
| 1 | 5.04 | 4.93 | 17.18 | 1.77 |
| 1 | 5.04 | 4.93 | 17.18 | 1.77 |

|   |      |      |       |      |
|---|------|------|-------|------|
| 1 | 5.04 | 4.93 | 17.18 | 1.77 |
| 1 | 5.04 | 4.93 | 17.18 | 1.77 |
| 1 | 5.04 | 4.93 | 17.18 | 1.77 |
| 1 | 5.04 | 4.93 | 17.18 | 1.77 |
| 1 | 5.04 | 4.94 | 17.18 | 1.77 |
| 1 | 5.04 | 4.93 | 17.18 | 1.77 |
| 1 | 5.04 | 4.94 | 17.18 | 1.77 |
| 1 | 5.04 | 4.94 | 17.18 | 1.77 |
| 1 | 5.04 | 4.93 | 17.18 | 1.77 |
| 1 | 5.04 | 4.94 | 17.18 | 1.77 |
| 1 | 5.04 | 4.93 | 17.18 | 1.77 |
| 1 | 5.04 | 4.93 | 17.18 | 1.77 |
| 1 | 5.04 | 4.93 | 17.18 | 1.77 |
| 1 | 5.04 | 4.93 | 17.18 | 1.77 |
| 1 | 5.04 | 4.94 | 17.18 | 1.77 |
| 1 | 5.04 | 4.93 | 17.18 | 1.77 |
| 1 | 5.04 | 4.93 | 17.18 | 1.77 |
| 1 | 5.04 | 4.93 | 17.18 | 1.77 |
| 1 | 5.04 | 4.94 | 17.18 | 1.77 |
| 1 | 5.04 | 4.93 | 17.18 | 1.77 |
| 1 | 5.04 | 4.93 | 17.18 | 1.77 |
| 1 | 5.04 | 4.94 | 17.18 | 1.77 |
| 1 | 5.04 | 4.93 | 17.18 | 1.77 |
| 1 | 5.04 | 4.94 | 17.18 | 1.77 |
| 1 | 5.04 | 4.93 | 17.18 | 1.77 |
| 1 | 5.04 | 4.93 | 17.18 | 1.77 |
| 1 | 5.04 | 4.94 | 17.18 | 1.77 |
| 1 | 5.04 | 4.93 | 17.18 | 1.77 |
| 1 | 5.04 | 4.93 | 17.18 | 1.77 |
| 1 | 5.04 | 4.94 | 17.18 | 1.77 |
| 1 | 5.04 | 4.93 | 17.18 | 1.77 |
| 1 | 5.04 | 4.93 | 17.18 | 1.77 |
| 1 | 5.04 | 4.94 | 17.18 | 1.77 |
| 1 | 5.04 | 4.93 | 17.18 | 1.77 |
| 1 | 5.04 | 4.93 | 17.18 | 1.77 |
| 1 | 5.04 | 4.94 | 17.18 | 1.77 |

|   |      |      |       |      |
|---|------|------|-------|------|
| 1 | 5.04 | 4.93 | 17.18 | 1.77 |
| 1 | 5.04 | 4.93 | 17.18 | 1.77 |
| 1 | 5.04 | 4.93 | 17.18 | 1.77 |
| 1 | 5.04 | 4.93 | 17.18 | 1.77 |
| 1 | 5.04 | 4.93 | 17.18 | 1.77 |
| 1 | 5.04 | 4.93 | 17.18 | 1.77 |
| 1 | 5.04 | 4.93 | 17.18 | 1.77 |
| 1 | 5.04 | 4.93 | 17.18 | 1.77 |
| 1 | 5.04 | 4.93 | 17.18 | 1.77 |
| 1 | 5.04 | 4.93 | 17.18 | 1.77 |
| 1 | 5.04 | 4.93 | 17.18 | 1.77 |
| 1 | 5.04 | 4.93 | 17.18 | 1.77 |
| 1 | 5.04 | 4.93 | 17.18 | 1.77 |
| 1 | 5.04 | 4.93 | 17.18 | 1.77 |
| 1 | 5.04 | 4.93 | 17.18 | 1.77 |
| 1 | 5.04 | 4.93 | 17.18 | 1.77 |
| 1 | 5.04 | 4.93 | 17.18 | 1.77 |
| 1 | 5.04 | 4.93 | 17.18 | 1.77 |
| 1 | 5.04 | 4.93 | 17.18 | 1.77 |
| 1 | 5.04 | 4.93 | 17.18 | 1.77 |
| 1 | 5.04 | 4.93 | 17.18 | 1.77 |
| 1 | 5.04 | 4.93 | 17.18 | 1.77 |
| 1 | 5.04 | 4.93 | 17.18 | 1.77 |
| 1 | 5.04 | 4.93 | 17.18 | 1.77 |
| 1 | 5.04 | 4.93 | 17.18 | 1.77 |
| 1 | 5.04 | 4.93 | 17.18 | 1.77 |
| 1 | 5.04 | 4.93 | 17.18 | 1.77 |
| 1 | 5.04 | 4.94 | 17.18 | 1.77 |
| 1 | 5.04 | 4.93 | 17.18 | 1.77 |
| 1 | 5.04 | 4.94 | 17.18 | 1.77 |
| 1 | 5.04 | 4.93 | 17.18 | 1.77 |
| 1 | 5.04 | 4.93 | 17.18 | 1.77 |
| 1 | 5.04 | 4.93 | 17.18 | 1.77 |
| 1 | 5.04 | 4.93 | 17.18 | 1.77 |
| 1 | 5.04 | 4.94 | 17.18 | 1.77 |
| 1 | 5.04 | 4.93 | 17.18 | 1.77 |
| 1 | 5.04 | 4.93 | 17.18 | 1.77 |
| 1 | 5.04 | 4.94 | 17.18 | 1.77 |
| 1 | 5.04 | 4.93 | 17.18 | 1.77 |
| 1 | 5.04 | 4.93 | 17.18 | 1.77 |
| 1 | 5.04 | 4.93 | 17.18 | 1.77 |
| 1 | 5.04 | 4.93 | 17.18 | 1.77 |
| 1 | 5.04 | 4.94 | 17.18 | 1.77 |
| 1 | 5.04 | 4.93 | 17.18 | 1.77 |
| 1 | 5.04 | 4.93 | 17.18 | 1.77 |
| 1 | 5.04 | 4.93 | 17.18 | 1.77 |



|   |      |      |       |      |
|---|------|------|-------|------|
| 1 | 5.04 | 4.93 | 17.18 | 1.77 |
| 1 | 5.04 | 4.93 | 17.18 | 1.77 |
| 1 | 5.04 | 4.94 | 17.18 | 1.77 |
| 1 | 5.04 | 4.94 | 17.18 | 1.77 |
| 1 | 5.04 | 4.94 | 17.18 | 1.77 |
| 1 | 5.04 | 4.93 | 17.18 | 1.77 |
| 1 | 5.04 | 4.93 | 17.18 | 1.77 |
| 1 | 5.04 | 4.94 | 17.18 | 1.77 |
| 1 | 5.04 | 4.93 | 17.18 | 1.77 |
| 1 | 5.04 | 4.93 | 17.18 | 1.77 |
| 1 | 5.04 | 4.94 | 17.18 | 1.77 |
| 1 | 5.04 | 4.94 | 17.18 | 1.77 |
| 1 | 5.04 | 4.93 | 17.18 | 1.77 |
| 1 | 5.04 | 4.93 | 17.18 | 1.77 |
| 1 | 5.04 | 4.94 | 17.18 | 1.77 |
| 1 | 5.04 | 4.94 | 17.18 | 1.77 |
| 1 | 5.04 | 4.93 | 17.18 | 1.77 |
| 1 | 5.04 | 4.93 | 17.18 | 1.77 |
| 1 | 5.04 | 4.94 | 17.18 | 1.77 |
| 1 | 5.04 | 4.93 | 17.18 | 1.77 |
| 1 | 5.04 | 4.93 | 17.18 | 1.77 |
| 1 | 5.04 | 4.93 | 17.18 | 1.77 |
| 1 | 5.04 | 4.94 | 17.18 | 1.77 |
| 1 | 5.04 | 4.93 | 17.18 | 1.77 |
| 1 | 5.04 | 4.93 | 17.18 | 1.77 |
| 1 | 5.04 | 4.93 | 17.18 | 1.77 |
| 1 | 5.04 | 4.93 | 17.18 | 1.77 |
| 1 | 5.04 | 4.93 | 17.18 | 1.77 |
| 1 | 5.04 | 4.94 | 17.18 | 1.77 |
| 1 | 5.04 | 4.93 | 17.18 | 1.77 |
| 1 | 5.04 | 4.93 | 17.18 | 1.77 |
| 1 | 5.04 | 4.94 | 17.18 | 1.77 |
| 1 | 5.04 | 4.93 | 17.18 | 1.77 |





|   |      |      |       |      |
|---|------|------|-------|------|
| 1 | 5.04 | 4.94 | 17.18 | 1.77 |
| 1 | 5.04 | 4.94 | 17.18 | 1.77 |
| 1 | 5.04 | 4.93 | 17.18 | 1.77 |
| 1 | 5.04 | 4.93 | 17.18 | 1.77 |
| 1 | 5.04 | 4.93 | 17.18 | 1.77 |
| 1 | 5.04 | 4.93 | 17.18 | 1.77 |
| 1 | 5.04 | 4.93 | 17.18 | 1.77 |
| 1 | 5.04 | 4.93 | 17.18 | 1.77 |
| 1 | 5.04 | 4.94 | 17.18 | 1.77 |
| 1 | 5.04 | 4.93 | 17.18 | 1.77 |
| 1 | 5.04 | 4.93 | 17.18 | 1.77 |
| 1 | 5.04 | 4.93 | 17.18 | 1.77 |
| 1 | 5.04 | 4.93 | 17.18 | 1.77 |
| 1 | 5.04 | 4.94 | 17.18 | 1.77 |
| 1 | 5.04 | 4.94 | 17.18 | 1.77 |
| 1 | 5.04 | 4.93 | 17.18 | 1.77 |
| 1 | 5.04 | 4.93 | 17.18 | 1.77 |
| 1 | 5.04 | 4.93 | 17.18 | 1.77 |
| 1 | 5.04 | 4.93 | 17.18 | 1.77 |
| 1 | 5.04 | 4.93 | 17.18 | 1.77 |
| 1 | 5.04 | 4.93 | 17.18 | 1.77 |
| 1 | 5.04 | 4.93 | 17.18 | 1.77 |
| 1 | 5.04 | 4.93 | 17.18 | 1.77 |
| 1 | 5.04 | 4.93 | 17.18 | 1.77 |
| 1 | 5.04 | 4.93 | 17.18 | 1.77 |
| 1 | 5.04 | 4.93 | 17.18 | 1.77 |
| 1 | 5.04 | 4.94 | 17.18 | 1.77 |
| 1 | 5.04 | 4.93 | 17.18 | 1.77 |
| 1 | 5.04 | 4.93 | 17.18 | 1.77 |
| 1 | 5.04 | 4.93 | 17.18 | 1.77 |
| 1 | 5.04 | 4.93 | 17.18 | 1.77 |
| 1 | 5.04 | 4.93 | 17.18 | 1.77 |
| 1 | 5.04 | 4.93 | 17.18 | 1.77 |
| 1 | 5.04 | 4.93 | 17.18 | 1.77 |
| 1 | 5.04 | 4.93 | 17.18 | 1.77 |
| 1 | 5.04 | 4.93 | 17.18 | 1.77 |
| 1 | 5.04 | 4.93 | 17.18 | 1.77 |
| 1 | 5.04 | 4.93 | 17.18 | 1.77 |
| 1 | 5.04 | 4.93 | 17.18 | 1.77 |
| 1 | 5.04 | 4.93 | 17.18 | 1.77 |
| 1 | 5.04 | 4.93 | 17.18 | 1.77 |
| 1 | 5.04 | 4.93 | 17.18 | 1.77 |
| 1 | 5.04 | 4.93 | 17.18 | 1.77 |
| 1 | 5.04 | 4.93 | 17.18 | 1.77 |
| 1 | 5.04 | 4.93 | 17.18 | 1.77 |
| 1 | 5.04 | 4.94 | 17.18 | 1.77 |

|   |      |      |       |      |
|---|------|------|-------|------|
| 1 | 5.04 | 4.93 | 17.18 | 1.77 |
| 1 | 5.04 | 4.93 | 17.18 | 1.77 |
| 1 | 5.04 | 4.94 | 17.18 | 1.77 |
| 1 | 5.04 | 4.93 | 17.18 | 1.77 |
| 1 | 5.04 | 4.93 | 17.18 | 1.77 |
| 1 | 5.04 | 4.94 | 17.18 | 1.77 |
| 1 | 5.04 | 4.93 | 17.18 | 1.77 |
| 1 | 5.04 | 4.93 | 17.18 | 1.77 |
| 1 | 5.04 | 4.93 | 17.18 | 1.77 |
| 1 | 5.04 | 4.94 | 17.18 | 1.77 |
| 1 | 5.04 | 4.93 | 17.18 | 1.77 |
| 1 | 5.04 | 4.93 | 17.18 | 1.77 |
| 1 | 5.04 | 4.93 | 17.18 | 1.77 |
| 1 | 5.04 | 4.93 | 17.18 | 1.77 |
| 1 | 5.04 | 4.94 | 17.18 | 1.77 |
| 1 | 5.04 | 4.93 | 17.18 | 1.77 |
| 1 | 5.04 | 4.93 | 17.18 | 1.77 |
| 1 | 5.04 | 4.94 | 17.18 | 1.77 |
| 1 | 5.04 | 4.93 | 17.18 | 1.77 |
| 1 | 5.04 | 4.93 | 17.18 | 1.77 |
| 1 | 5.04 | 4.93 | 17.18 | 1.77 |
| 1 | 5.04 | 4.94 | 17.18 | 1.77 |
| 1 | 5.04 | 4.93 | 17.18 | 1.77 |
| 1 | 5.04 | 4.93 | 17.18 | 1.77 |
| 1 | 5.04 | 4.93 | 17.18 | 1.77 |
| 1 | 5.04 | 4.93 | 17.18 | 1.77 |
| 1 | 5.04 | 4.94 | 17.18 | 1.77 |
| 1 | 5.04 | 4.93 | 17.18 | 1.77 |
| 1 | 5.04 | 4.94 | 17.18 | 1.77 |
| 1 | 5.04 | 4.93 | 17.18 | 1.77 |
| 1 | 5.04 | 4.93 | 17.18 | 1.77 |
| 1 | 5.04 | 4.94 | 17.18 | 1.77 |
| 1 | 5.04 | 4.94 | 17.18 | 1.77 |
| 1 | 5.04 | 4.93 | 17.18 | 1.77 |



|   |      |      |       |      |
|---|------|------|-------|------|
| 1 | 5.04 | 4.93 | 17.18 | 1.77 |
| 1 | 5.04 | 4.93 | 17.18 | 1.77 |
| 1 | 5.04 | 4.93 | 17.18 | 1.77 |
| 1 | 5.04 | 4.93 | 17.18 | 1.77 |
| 1 | 5.04 | 4.93 | 17.18 | 1.77 |
| 1 | 5.04 | 4.93 | 17.18 | 1.77 |
| 1 | 5.04 | 4.93 | 17.18 | 1.77 |
| 1 | 5.04 | 4.94 | 17.18 | 1.77 |
| 1 | 5.04 | 4.93 | 17.18 | 1.77 |
| 1 | 5.04 | 4.93 | 17.18 | 1.77 |
| 1 | 5.04 | 4.94 | 17.18 | 1.77 |
| 1 | 5.04 | 4.93 | 17.18 | 1.77 |
| 1 | 5.04 | 4.94 | 17.18 | 1.77 |
| 1 | 5.04 | 4.93 | 17.18 | 1.77 |
| 1 | 5.04 | 4.93 | 17.18 | 1.77 |
| 1 | 5.04 | 4.94 | 17.18 | 1.77 |
| 1 | 5.04 | 4.93 | 17.18 | 1.77 |
| 1 | 5.04 | 4.93 | 17.18 | 1.77 |
| 1 | 5.04 | 4.93 | 17.18 | 1.77 |
| 1 | 5.04 | 4.93 | 17.18 | 1.77 |
| 1 | 5.04 | 4.93 | 17.18 | 1.77 |
| 1 | 5.04 | 4.93 | 17.18 | 1.77 |
| 1 | 5.04 | 4.93 | 17.18 | 1.77 |
| 1 | 5.04 | 4.93 | 17.18 | 1.77 |
| 1 | 5.04 | 4.93 | 17.18 | 1.77 |
| 1 | 5.04 | 4.94 | 17.18 | 1.77 |
| 1 | 5.04 | 4.93 | 17.18 | 1.77 |
| 1 | 5.04 | 4.93 | 17.18 | 1.77 |
| 1 | 5.04 | 4.93 | 17.18 | 1.77 |
| 1 | 5.04 | 4.93 | 17.18 | 1.77 |
| 1 | 5.04 | 4.93 | 17.18 | 1.77 |
| 1 | 5.04 | 4.93 | 17.18 | 1.77 |
| 1 | 5.04 | 4.93 | 17.18 | 1.77 |
| 1 | 5.04 | 4.93 | 17.18 | 1.77 |
| 1 | 5.04 | 4.93 | 17.18 | 1.77 |
| 1 | 5.04 | 4.93 | 17.18 | 1.77 |
| 1 | 5.04 | 4.94 | 17.18 | 1.77 |
| 1 | 5.04 | 4.93 | 17.18 | 1.77 |
| 1 | 5.04 | 4.94 | 17.18 | 1.77 |

|   |      |      |       |      |
|---|------|------|-------|------|
| 1 | 5.04 | 4.94 | 17.18 | 1.77 |
| 1 | 5.04 | 4.93 | 17.18 | 1.77 |
| 1 | 5.04 | 4.94 | 17.18 | 1.77 |
| 1 | 5.04 | 4.93 | 17.18 | 1.77 |
| 1 | 5.04 | 4.94 | 17.18 | 1.77 |
| 1 | 5.04 | 4.93 | 17.18 | 1.77 |
| 1 | 5.04 | 4.93 | 17.18 | 1.77 |
| 1 | 5.04 | 4.93 | 17.18 | 1.77 |
| 1 | 5.04 | 4.93 | 17.18 | 1.77 |
| 1 | 5.04 | 4.94 | 17.18 | 1.77 |
| 1 | 5.04 | 4.93 | 17.18 | 1.77 |
| 1 | 5.04 | 4.93 | 17.18 | 1.77 |
| 1 | 5.04 | 4.93 | 17.18 | 1.77 |
| 1 | 5.04 | 4.93 | 17.18 | 1.77 |
| 1 | 5.04 | 4.93 | 17.18 | 1.77 |
| 1 | 5.04 | 4.93 | 17.18 | 1.77 |
| 1 | 5.04 | 4.93 | 17.18 | 1.77 |
| 1 | 5.04 | 4.94 | 17.18 | 1.77 |
| 1 | 5.04 | 4.93 | 17.18 | 1.77 |
| 1 | 5.04 | 4.93 | 17.18 | 1.77 |
| 1 | 5.04 | 4.93 | 17.18 | 1.77 |
| 1 | 5.04 | 4.93 | 17.18 | 1.77 |
| 1 | 5.04 | 4.93 | 17.18 | 1.77 |
| 1 | 5.04 | 4.93 | 17.18 | 1.77 |
| 1 | 5.04 | 4.93 | 17.18 | 1.77 |
| 1 | 5.04 | 4.93 | 17.18 | 1.77 |
| 1 | 5.04 | 4.93 | 17.18 | 1.77 |
| 1 | 5.04 | 4.93 | 17.18 | 1.77 |
| 1 | 5.04 | 4.93 | 17.18 | 1.77 |
| 1 | 5.04 | 4.93 | 17.18 | 1.77 |
| 1 | 5.04 | 4.93 | 17.18 | 1.77 |
| 1 | 5.04 | 4.93 | 17.18 | 1.77 |
| 1 | 5.04 | 4.93 | 17.18 | 1.77 |
| 1 | 5.04 | 4.93 | 17.18 | 1.77 |
| 1 | 5.04 | 4.93 | 17.18 | 1.77 |
| 1 | 5.04 | 4.93 | 17.18 | 1.77 |
| 1 | 5.04 | 4.93 | 17.18 | 1.77 |
| 1 | 5.04 | 4.94 | 17.18 | 1.77 |
| 1 | 5.04 | 4.93 | 17.18 | 1.77 |







|   |      |      |       |      |
|---|------|------|-------|------|
| 1 | 5.04 | 4.93 | 17.18 | 1.77 |
| 1 | 5.04 | 4.93 | 17.18 | 1.77 |
| 1 | 5.04 | 4.93 | 17.18 | 1.77 |
| 1 | 5.04 | 4.93 | 17.18 | 1.77 |
| 1 | 5.04 | 4.93 | 17.18 | 1.77 |
| 1 | 5.04 | 4.93 | 17.18 | 1.77 |
| 1 | 5.04 | 4.93 | 17.18 | 1.77 |
| 1 | 5.04 | 4.93 | 17.18 | 1.77 |
| 1 | 5.04 | 4.93 | 17.18 | 1.77 |
| 1 | 5.04 | 4.93 | 17.18 | 1.77 |
| 1 | 5.04 | 4.94 | 17.18 | 1.77 |
| 1 | 5.04 | 4.93 | 17.18 | 1.77 |
| 1 | 5.04 | 4.93 | 17.18 | 1.77 |
| 1 | 5.04 | 4.93 | 17.18 | 1.77 |
| 1 | 5.04 | 4.93 | 17.18 | 1.77 |
| 1 | 5.04 | 4.93 | 17.18 | 1.77 |
| 1 | 5.04 | 4.94 | 17.18 | 1.77 |
| 1 | 5.04 | 4.93 | 17.18 | 1.77 |
| 1 | 5.04 | 4.93 | 17.18 | 1.77 |
| 1 | 5.04 | 4.93 | 17.18 | 1.77 |
| 1 | 5.04 | 4.94 | 17.18 | 1.77 |
| 1 | 5.04 | 4.93 | 17.18 | 1.77 |
| 1 | 5.04 | 4.93 | 17.18 | 1.77 |
| 1 | 5.04 | 4.93 | 17.18 | 1.77 |
| 1 | 5.04 | 4.93 | 17.18 | 1.77 |
| 1 | 5.04 | 4.93 | 17.18 | 1.77 |
| 1 | 5.04 | 4.93 | 17.18 | 1.77 |
| 1 | 5.04 | 4.93 | 17.18 | 1.77 |
| 1 | 5.04 | 4.93 | 17.18 | 1.77 |
| 1 | 5.04 | 4.93 | 17.18 | 1.77 |
| 1 | 5.04 | 4.93 | 17.18 | 1.77 |
| 1 | 5.04 | 4.94 | 17.18 | 1.77 |
| 1 | 5.04 | 4.93 | 17.18 | 1.77 |
| 1 | 5.04 | 4.93 | 17.18 | 1.77 |

|   |      |      |       |      |
|---|------|------|-------|------|
| 1 | 5.04 | 4.93 | 17.18 | 1.77 |
| 1 | 5.04 | 4.93 | 17.18 | 1.77 |
| 1 | 5.04 | 4.93 | 17.18 | 1.77 |
| 1 | 5.04 | 4.94 | 17.18 | 1.77 |
| 1 | 5.04 | 4.93 | 17.18 | 1.77 |
| 1 | 5.04 | 4.94 | 17.18 | 1.77 |
| 1 | 5.04 | 4.94 | 17.18 | 1.77 |
| 1 | 5.04 | 4.94 | 17.18 | 1.77 |
| 1 | 5.04 | 4.93 | 17.18 | 1.77 |
| 1 | 5.04 | 4.93 | 17.18 | 1.77 |
| 1 | 5.04 | 4.93 | 17.18 | 1.77 |
| 1 | 5.04 | 4.94 | 17.18 | 1.77 |
| 1 | 5.04 | 4.94 | 17.18 | 1.77 |
| 1 | 5.04 | 4.93 | 17.18 | 1.77 |
| 1 | 5.04 | 4.93 | 17.18 | 1.77 |
| 1 | 5.04 | 4.94 | 17.18 | 1.77 |
| 1 | 5.04 | 4.93 | 17.18 | 1.77 |
| 1 | 5.04 | 4.93 | 17.18 | 1.77 |
| 1 | 5.04 | 4.94 | 17.18 | 1.77 |
| 1 | 5.04 | 4.93 | 17.18 | 1.77 |
| 1 | 5.04 | 4.93 | 17.18 | 1.77 |
| 1 | 5.04 | 4.94 | 17.18 | 1.77 |
| 1 | 5.04 | 4.94 | 17.18 | 1.77 |
| 1 | 5.04 | 4.93 | 17.18 | 1.77 |
| 1 | 5.04 | 4.93 | 17.18 | 1.77 |
| 1 | 5.04 | 4.93 | 17.18 | 1.77 |
| 1 | 5.04 | 4.93 | 17.18 | 1.77 |
| 1 | 5.04 | 4.93 | 17.18 | 1.77 |
| 1 | 5.04 | 4.94 | 17.18 | 1.77 |
| 1 | 5.04 | 4.93 | 17.18 | 1.77 |
| 1 | 5.04 | 4.93 | 17.18 | 1.77 |
| 1 | 5.04 | 4.93 | 17.18 | 1.77 |
| 1 | 5.04 | 4.94 | 17.18 | 1.77 |
| 1 | 5.04 | 4.93 | 17.18 | 1.77 |
| 1 | 5.04 | 4.93 | 17.18 | 1.77 |
| 1 | 5.04 | 4.94 | 17.18 | 1.77 |

|   |      |      |       |      |
|---|------|------|-------|------|
| 1 | 5.04 | 4.93 | 17.18 | 1.77 |
| 1 | 5.04 | 4.93 | 17.18 | 1.77 |
| 1 | 5.04 | 4.93 | 17.18 | 1.77 |
| 1 | 5.04 | 4.93 | 17.18 | 1.77 |
| 1 | 5.04 | 4.93 | 17.18 | 1.77 |
| 1 | 5.04 | 4.93 | 17.18 | 1.77 |
| 1 | 5.04 | 4.94 | 17.18 | 1.77 |
| 1 | 5.04 | 4.93 | 17.18 | 1.77 |
| 1 | 5.04 | 4.93 | 17.18 | 1.77 |
| 1 | 5.04 | 4.93 | 17.18 | 1.77 |
| 1 | 5.04 | 4.93 | 17.18 | 1.77 |
| 1 | 5.04 | 4.93 | 17.18 | 1.77 |
| 1 | 5.04 | 4.93 | 17.18 | 1.77 |
| 1 | 5.04 | 4.93 | 17.18 | 1.77 |
| 1 | 5.04 | 4.93 | 17.18 | 1.77 |
| 1 | 5.04 | 4.94 | 17.18 | 1.77 |
| 1 | 5.04 | 4.94 | 17.18 | 1.77 |
| 1 | 5.04 | 4.93 | 17.18 | 1.77 |
| 1 | 5.04 | 4.93 | 17.18 | 1.77 |
| 1 | 5.04 | 4.93 | 17.18 | 1.77 |
| 1 | 5.04 | 4.94 | 17.18 | 1.77 |
| 1 | 5.04 | 4.93 | 17.18 | 1.77 |
| 1 | 5.04 | 4.93 | 17.18 | 1.77 |
| 1 | 5.04 | 4.93 | 17.18 | 1.77 |
| 1 | 5.04 | 4.93 | 17.18 | 1.77 |
| 1 | 5.04 | 4.93 | 17.18 | 1.77 |
| 1 | 5.04 | 4.94 | 17.18 | 1.77 |
| 1 | 5.04 | 4.93 | 17.18 | 1.77 |
| 1 | 5.04 | 4.93 | 17.18 | 1.77 |
| 1 | 5.04 | 4.93 | 17.18 | 1.77 |
| 1 | 5.04 | 4.93 | 17.18 | 1.77 |
| 1 | 5.04 | 4.93 | 17.18 | 1.77 |
| 1 | 5.04 | 4.93 | 17.18 | 1.77 |
| 1 | 5.04 | 4.93 | 17.18 | 1.77 |
| 1 | 5.04 | 4.93 | 17.18 | 1.77 |
| 1 | 5.04 | 4.93 | 17.18 | 1.77 |
| 1 | 5.04 | 4.93 | 17.18 | 1.77 |
| 1 | 5.04 | 4.93 | 17.18 | 1.77 |
| 1 | 5.04 | 4.93 | 17.18 | 1.77 |
| 1 | 5.04 | 4.94 | 17.18 | 1.77 |
| 1 | 5.04 | 4.93 | 17.18 | 1.77 |
| 1 | 5.04 | 4.94 | 17.18 | 1.77 |

|   |      |      |       |      |
|---|------|------|-------|------|
| 1 | 5.04 | 4.93 | 17.18 | 1.77 |
| 1 | 5.04 | 4.93 | 17.18 | 1.77 |
| 1 | 5.04 | 4.93 | 17.18 | 1.77 |
| 1 | 5.04 | 4.93 | 17.18 | 1.77 |
| 1 | 5.04 | 4.93 | 17.18 | 1.77 |
| 1 | 5.04 | 4.93 | 17.18 | 1.77 |
| 1 | 5.04 | 4.93 | 17.18 | 1.77 |
| 1 | 5.04 | 4.93 | 17.18 | 1.77 |
| 1 | 5.04 | 4.93 | 17.18 | 1.77 |
| 1 | 5.04 | 4.93 | 17.18 | 1.77 |
| 1 | 5.04 | 4.93 | 17.18 | 1.77 |
| 1 | 5.04 | 4.93 | 17.18 | 1.77 |
| 1 | 5.04 | 4.93 | 17.18 | 1.77 |
| 1 | 5.04 | 4.94 | 17.18 | 1.77 |
| 1 | 5.04 | 4.93 | 17.18 | 1.77 |
| 1 | 5.04 | 4.93 | 17.18 | 1.77 |
| 1 | 5.04 | 4.93 | 17.18 | 1.77 |
| 1 | 5.04 | 4.94 | 17.18 | 1.77 |
| 1 | 5.04 | 4.93 | 17.18 | 1.77 |
| 1 | 5.04 | 4.93 | 17.18 | 1.77 |
| 1 | 5.04 | 4.93 | 17.18 | 1.77 |
| 1 | 5.04 | 4.94 | 17.18 | 1.77 |
| 1 | 5.04 | 4.93 | 17.18 | 1.77 |
| 1 | 5.04 | 4.93 | 17.18 | 1.77 |
| 1 | 5.04 | 4.93 | 17.18 | 1.77 |
| 1 | 5.04 | 4.93 | 17.18 | 1.77 |
| 1 | 5.04 | 4.93 | 17.18 | 1.77 |
| 1 | 5.04 | 4.93 | 17.18 | 1.77 |
| 1 | 5.04 | 4.94 | 17.18 | 1.77 |
| 1 | 5.04 | 4.93 | 17.18 | 1.77 |
| 1 | 5.04 | 4.93 | 17.18 | 1.77 |
| 1 | 5.04 | 4.93 | 17.18 | 1.77 |
| 1 | 5.04 | 4.93 | 17.18 | 1.77 |
| 1 | 5.04 | 4.94 | 17.18 | 1.77 |
| 1 | 5.04 | 4.93 | 17.18 | 1.77 |
| 1 | 5.04 | 4.93 | 17.18 | 1.77 |
| 1 | 5.04 | 4.93 | 17.18 | 1.77 |
| 1 | 5.04 | 4.93 | 17.18 | 1.77 |



|   |      |      |       |      |
|---|------|------|-------|------|
| 1 | 5.04 | 4.93 | 17.18 | 1.77 |
| 1 | 5.04 | 4.93 | 17.18 | 1.77 |
| 1 | 5.04 | 4.93 | 17.18 | 1.77 |
| 1 | 5.04 | 4.93 | 17.18 | 1.77 |
| 1 | 5.04 | 4.93 | 17.18 | 1.77 |
| 1 | 5.04 | 4.93 | 17.18 | 1.77 |
| 1 | 5.04 | 4.93 | 17.18 | 1.77 |
| 1 | 5.04 | 4.93 | 17.18 | 1.77 |
| 1 | 5.04 | 4.93 | 17.18 | 1.77 |
| 1 | 5.04 | 4.93 | 17.18 | 1.77 |
| 1 | 5.04 | 4.93 | 17.18 | 1.77 |
| 1 | 5.04 | 4.93 | 17.18 | 1.77 |
| 1 | 5.04 | 4.93 | 17.18 | 1.77 |
| 1 | 5.04 | 4.94 | 17.18 | 1.77 |
| 1 | 5.04 | 4.93 | 17.18 | 1.77 |
| 1 | 5.04 | 4.94 | 17.18 | 1.77 |
| 1 | 5.04 | 4.93 | 17.18 | 1.77 |
| 1 | 5.04 | 4.93 | 17.18 | 1.77 |
| 1 | 5.04 | 4.94 | 17.18 | 1.77 |
| 1 | 5.04 | 4.93 | 17.18 | 1.77 |
| 1 | 5.04 | 4.93 | 17.18 | 1.77 |
| 1 | 5.04 | 4.94 | 17.18 | 1.77 |
| 1 | 5.04 | 4.93 | 17.18 | 1.77 |
| 1 | 5.04 | 4.93 | 17.18 | 1.77 |
| 1 | 5.04 | 4.94 | 17.18 | 1.77 |
| 1 | 5.04 | 4.93 | 17.18 | 1.77 |
| 1 | 5.04 | 4.93 | 17.18 | 1.77 |
| 1 | 5.04 | 4.93 | 17.18 | 1.77 |
| 1 | 5.04 | 4.93 | 17.18 | 1.77 |
| 1 | 5.04 | 4.93 | 17.18 | 1.77 |
| 1 | 5.04 | 4.94 | 17.18 | 1.77 |
| 1 | 5.04 | 4.93 | 17.18 | 1.77 |
| 1 | 5.04 | 4.93 | 17.18 | 1.77 |
| 1 | 5.04 | 4.94 | 17.18 | 1.77 |
| 1 | 5.04 | 4.93 | 17.18 | 1.77 |
| 1 | 5.04 | 4.93 | 17.18 | 1.77 |











|   |      |      |       |      |
|---|------|------|-------|------|
| 1 | 5.04 | 4.93 | 17.18 | 1.77 |
| 1 | 5.04 | 4.93 | 17.18 | 1.77 |
| 1 | 5.04 | 4.93 | 17.18 | 1.77 |
| 1 | 5.04 | 4.94 | 17.18 | 1.77 |
| 1 | 5.04 | 4.93 | 17.18 | 1.77 |
| 1 | 5.04 | 4.93 | 17.18 | 1.77 |
| 1 | 5.04 | 4.93 | 17.18 | 1.77 |
| 1 | 5.04 | 4.94 | 17.18 | 1.77 |
| 1 | 5.04 | 4.93 | 17.18 | 1.77 |
| 1 | 5.04 | 4.93 | 17.18 | 1.77 |
| 1 | 5.04 | 4.93 | 17.18 | 1.77 |
| 1 | 5.04 | 4.94 | 17.18 | 1.77 |
| 1 | 5.04 | 4.93 | 17.18 | 1.77 |
| 1 | 5.04 | 4.93 | 17.18 | 1.77 |
| 1 | 5.04 | 4.93 | 17.18 | 1.77 |
| 1 | 5.04 | 4.94 | 17.18 | 1.77 |
| 1 | 5.04 | 4.93 | 17.18 | 1.77 |
| 1 | 5.04 | 4.93 | 17.18 | 1.77 |
| 1 | 5.04 | 4.93 | 17.18 | 1.77 |
| 1 | 5.04 | 4.94 | 17.18 | 1.77 |
| 1 | 5.04 | 4.93 | 17.18 | 1.77 |
| 1 | 5.04 | 4.94 | 17.18 | 1.77 |
| 1 | 5.04 | 4.93 | 17.18 | 1.77 |
| 1 | 5.04 | 4.93 | 17.18 | 1.77 |
| 1 | 5.04 | 4.93 | 17.18 | 1.77 |
| 1 | 5.04 | 4.93 | 17.18 | 1.77 |
| 1 | 5.04 | 4.93 | 17.18 | 1.77 |
| 1 | 5.04 | 4.93 | 17.18 | 1.77 |
| 1 | 5.04 | 4.94 | 17.18 | 1.77 |
| 1 | 5.04 | 4.93 | 17.18 | 1.77 |
| 1 | 5.04 | 4.94 | 17.18 | 1.77 |
| 1 | 5.04 | 4.93 | 17.18 | 1.77 |
| 1 | 5.04 | 4.93 | 17.18 | 1.77 |
| 1 | 5.04 | 4.94 | 17.18 | 1.77 |
| 1 | 5.04 | 4.93 | 17.18 | 1.77 |
| 1 | 5.04 | 4.93 | 17.18 | 1.77 |
| 1 | 5.04 | 4.94 | 17.18 | 1.77 |
| 1 | 5.04 | 4.93 | 17.18 | 1.77 |
| 1 | 5.04 | 4.94 | 17.18 | 1.77 |









|   |      |      |       |      |
|---|------|------|-------|------|
| 1 | 5.04 | 4.93 | 17.18 | 1.77 |
| 1 | 5.04 | 4.93 | 17.18 | 1.77 |
| 1 | 5.04 | 4.93 | 17.18 | 1.77 |
| 1 | 5.04 | 4.93 | 17.18 | 1.77 |
| 1 | 5.04 | 4.94 | 17.18 | 1.77 |
| 1 | 5.04 | 4.93 | 17.18 | 1.77 |
| 1 | 5.04 | 4.93 | 17.18 | 1.77 |
| 1 | 5.04 | 4.93 | 17.18 | 1.77 |
| 1 | 5.04 | 4.93 | 17.18 | 1.77 |
| 1 | 5.04 | 4.93 | 17.18 | 1.77 |
| 1 | 5.04 | 4.93 | 17.18 | 1.77 |
| 1 | 5.04 | 4.93 | 17.18 | 1.77 |
| 1 | 5.04 | 4.93 | 17.18 | 1.77 |
| 1 | 5.04 | 4.94 | 17.18 | 1.77 |
| 1 | 5.04 | 4.93 | 17.18 | 1.77 |
| 1 | 5.04 | 4.94 | 17.18 | 1.77 |
| 1 | 5.04 | 4.93 | 17.18 | 1.77 |
| 1 | 5.04 | 4.94 | 17.18 | 1.77 |
| 1 | 5.04 | 4.94 | 17.18 | 1.77 |
| 1 | 5.04 | 4.93 | 17.18 | 1.77 |
| 1 | 5.04 | 4.93 | 17.18 | 1.77 |
| 1 | 5.04 | 4.93 | 17.18 | 1.77 |
| 1 | 5.04 | 4.94 | 17.18 | 1.77 |
| 1 | 5.04 | 4.94 | 17.18 | 1.77 |
| 1 | 5.04 | 4.93 | 17.18 | 1.77 |
| 1 | 5.04 | 4.94 | 17.18 | 1.77 |
| 1 | 5.04 | 4.93 | 17.18 | 1.77 |
| 1 | 5.04 | 4.93 | 17.18 | 1.77 |
| 1 | 5.04 | 4.94 | 17.18 | 1.77 |
| 1 | 5.04 | 4.93 | 17.18 | 1.77 |
| 1 | 5.04 | 4.93 | 17.18 | 1.77 |
| 1 | 5.04 | 4.94 | 17.18 | 1.77 |
| 1 | 5.04 | 4.93 | 17.18 | 1.77 |
| 1 | 5.04 | 4.93 | 17.18 | 1.77 |





|   |      |      |       |      |
|---|------|------|-------|------|
| 1 | 5.04 | 4.93 | 17.18 | 1.77 |
| 1 | 5.04 | 4.93 | 17.18 | 1.77 |
| 1 | 5.04 | 4.94 | 17.18 | 1.77 |
| 1 | 5.04 | 4.93 | 17.18 | 1.77 |
| 1 | 5.04 | 4.94 | 17.18 | 1.77 |
| 1 | 5.04 | 4.93 | 17.18 | 1.77 |
| 1 | 5.04 | 4.93 | 17.18 | 1.77 |
| 1 | 5.04 | 4.93 | 17.18 | 1.77 |
| 1 | 5.04 | 4.94 | 17.18 | 1.77 |
| 1 | 5.04 | 4.94 | 17.18 | 1.77 |
| 1 | 5.04 | 4.94 | 17.18 | 1.77 |
| 1 | 5.04 | 4.93 | 17.18 | 1.77 |
| 1 | 5.04 | 4.93 | 17.18 | 1.77 |
| 1 | 5.04 | 4.93 | 17.18 | 1.77 |
| 1 | 5.04 | 4.94 | 17.18 | 1.77 |
| 1 | 5.04 | 4.93 | 17.18 | 1.77 |
| 1 | 5.04 | 4.93 | 17.18 | 1.77 |
| 1 | 5.04 | 4.94 | 17.18 | 1.77 |
| 1 | 5.04 | 4.93 | 17.18 | 1.77 |
| 1 | 5.04 | 4.93 | 17.18 | 1.77 |
| 1 | 5.04 | 4.94 | 17.18 | 1.77 |
| 1 | 5.04 | 4.94 | 17.18 | 1.77 |
| 1 | 5.04 | 4.94 | 17.18 | 1.77 |
| 1 | 5.04 | 4.93 | 17.18 | 1.77 |
| 1 | 5.04 | 4.93 | 17.18 | 1.77 |
| 1 | 5.04 | 4.94 | 17.18 | 1.77 |
| 1 | 5.04 | 4.93 | 17.18 | 1.77 |
| 1 | 5.04 | 4.93 | 17.18 | 1.77 |
| 1 | 5.04 | 4.94 | 17.18 | 1.77 |
| 1 | 5.04 | 4.93 | 17.18 | 1.77 |
| 1 | 5.04 | 4.93 | 17.18 | 1.77 |
| 1 | 5.04 | 4.93 | 17.18 | 1.77 |
| 1 | 5.04 | 4.94 | 17.18 | 1.77 |
| 1 | 5.04 | 4.93 | 17.18 | 1.77 |
| 1 | 5.04 | 4.93 | 17.18 | 1.77 |





|   |      |      |       |      |
|---|------|------|-------|------|
| 1 | 5.04 | 4.93 | 17.18 | 1.77 |
| 1 | 5.04 | 4.94 | 17.18 | 1.77 |
| 1 | 5.04 | 4.93 | 17.18 | 1.77 |
| 1 | 5.04 | 4.93 | 17.18 | 1.77 |
| 1 | 5.04 | 4.93 | 17.18 | 1.77 |
| 1 | 5.04 | 4.93 | 17.18 | 1.77 |
| 1 | 5.04 | 4.93 | 17.18 | 1.77 |
| 1 | 5.04 | 4.93 | 17.18 | 1.77 |
| 1 | 5.04 | 4.93 | 17.18 | 1.77 |
| 1 | 5.04 | 4.93 | 17.18 | 1.77 |
| 1 | 5.04 | 4.93 | 17.18 | 1.77 |
| 1 | 5.04 | 4.93 | 17.18 | 1.77 |
| 1 | 5.04 | 4.93 | 17.18 | 1.77 |
| 1 | 5.04 | 4.93 | 17.18 | 1.77 |
| 1 | 5.04 | 4.93 | 17.18 | 1.77 |
| 1 | 5.04 | 4.93 | 17.18 | 1.77 |
| 1 | 5.04 | 4.94 | 17.18 | 1.77 |
| 1 | 5.04 | 4.93 | 17.18 | 1.77 |
| 1 | 5.04 | 4.93 | 17.18 | 1.77 |
| 1 | 5.04 | 4.94 | 17.18 | 1.77 |
| 1 | 5.04 | 4.93 | 17.18 | 1.77 |
| 1 | 5.04 | 4.93 | 17.18 | 1.77 |
| 1 | 5.04 | 4.93 | 17.18 | 1.77 |
| 1 | 5.04 | 4.93 | 17.18 | 1.77 |
| 1 | 5.04 | 4.93 | 17.18 | 1.77 |
| 1 | 5.04 | 4.93 | 17.18 | 1.77 |
| 1 | 5.04 | 4.94 | 17.18 | 1.77 |
| 1 | 5.04 | 4.93 | 17.18 | 1.77 |
| 1 | 5.04 | 4.93 | 17.18 | 1.77 |
| 1 | 5.04 | 4.94 | 17.18 | 1.77 |
| 1 | 5.04 | 4.94 | 17.18 | 1.77 |
| 1 | 5.04 | 4.93 | 17.18 | 1.77 |
| 1 | 5.04 | 4.93 | 17.18 | 1.77 |
| 1 | 5.04 | 4.94 | 17.18 | 1.77 |
| 1 | 5.04 | 4.93 | 17.18 | 1.77 |
| 1 | 5.04 | 4.93 | 17.18 | 1.77 |
| 1 | 5.04 | 4.93 | 17.18 | 1.77 |





|   |      |      |       |      |
|---|------|------|-------|------|
| 1 | 5.04 | 4.93 | 17.18 | 1.77 |
| 1 | 5.04 | 4.93 | 17.18 | 1.77 |
| 1 | 5.04 | 4.93 | 17.18 | 1.77 |
| 1 | 5.04 | 4.94 | 17.18 | 1.77 |
| 1 | 5.04 | 4.94 | 17.18 | 1.77 |
| 1 | 5.04 | 4.94 | 17.18 | 1.77 |
| 1 | 5.04 | 4.93 | 17.18 | 1.77 |
| 1 | 5.04 | 4.93 | 17.18 | 1.77 |





















































































































































































































































































|      |      |      |      |      |       |
|------|------|------|------|------|-------|
| 8.29 | 2.36 | 5.53 | 4.69 | 4.68 | 16.57 |
| 8.29 | 2.36 | 5.53 | 4.69 | 4.68 | 16.57 |
| 8.29 | 2.36 | 5.53 | 4.69 | 4.68 | 16.57 |
| 8.29 | 2.36 | 5.53 | 4.69 | 4.68 | 16.57 |
| 8.29 | 2.36 | 5.53 | 4.69 | 4.68 | 16.57 |
| 8.29 | 2.36 | 5.53 | 4.69 | 4.68 | 16.57 |
| 8.29 | 2.36 | 5.53 | 4.69 | 4.67 | 16.57 |
| 8.29 | 2.36 | 5.53 | 4.69 | 4.68 | 16.57 |
| 8.29 | 2.36 | 5.53 | 4.69 | 4.68 | 16.57 |
| 8.29 | 2.36 | 5.53 | 4.69 | 4.68 | 16.57 |
| 8.29 | 2.36 | 5.53 | 4.69 | 4.68 | 16.57 |
| 8.29 | 2.36 | 5.53 | 4.69 | 4.68 | 16.57 |
| 8.29 | 2.36 | 5.53 | 4.69 | 4.68 | 16.57 |
| 8.29 | 2.36 | 5.53 | 4.69 | 4.68 | 16.57 |
| 8.29 | 2.36 | 5.53 | 4.69 | 4.68 | 16.57 |
| 8.29 | 2.36 | 5.53 | 4.69 | 4.68 | 16.57 |
| 8.29 | 2.36 | 5.53 | 4.69 | 4.68 | 16.57 |
| 8.29 | 2.36 | 5.53 | 4.69 | 4.68 | 16.57 |
| 8.29 | 2.36 | 5.53 | 4.69 | 4.68 | 16.57 |
| 8.29 | 2.36 | 5.53 | 4.69 | 4.68 | 16.57 |
| 8.29 | 2.36 | 5.53 | 4.69 | 4.68 | 16.57 |
| 8.29 | 2.36 | 5.53 | 4.69 | 4.68 | 16.57 |
| 8.29 | 2.36 | 5.53 | 4.69 | 4.68 | 16.57 |
| 8.29 | 2.36 | 5.53 | 4.69 | 4.68 | 16.57 |
| 8.29 | 2.36 | 5.53 | 4.69 | 4.68 | 16.57 |
| 8.29 | 2.36 | 5.53 | 4.69 | 4.68 | 16.57 |
| 8.29 | 2.36 | 5.53 | 4.69 | 4.68 | 16.57 |
| 8.29 | 2.36 | 5.53 | 4.69 | 4.68 | 16.57 |
| 8.29 | 2.36 | 5.53 | 4.69 | 4.68 | 16.57 |
| 8.29 | 2.36 | 5.53 | 4.69 | 4.68 | 16.57 |
| 8.29 | 2.36 | 5.53 | 4.69 | 4.68 | 16.57 |
| 8.29 | 2.36 | 5.53 | 4.69 | 4.68 | 16.57 |
| 8.29 | 2.36 | 5.53 | 4.69 | 4.67 | 16.57 |
| 8.29 | 2.36 | 5.53 | 4.69 | 4.68 | 16.57 |
| 8.29 | 2.36 | 5.53 | 4.69 | 4.68 | 16.57 |

































































































































































































































































































































































































































































































































































































































































































































































































































































































































































































































































































































































| RzSp   | a    | b      | c     | d      |
|--------|------|--------|-------|--------|
| 217.10 | 9.73 | -10.52 | 20.11 | 154.98 |
| 217.10 | 9.73 | -10.52 | 20.11 | 154.98 |
| 217.10 | 9.73 | -10.52 | 20.11 | 154.98 |
| 217.10 | 9.74 | -10.52 | 20.11 | 154.98 |
| 217.10 | 9.73 | -10.52 | 20.11 | 154.98 |
| 217.10 | 9.73 | -10.52 | 20.11 | 154.98 |
| 217.10 | 9.73 | -10.52 | 20.11 | 154.98 |
| 217.10 | 9.73 | -10.52 | 20.11 | 154.98 |
| 217.10 | 9.73 | -10.52 | 20.11 | 154.98 |
| 217.10 | 9.73 | -10.52 | 20.10 | 154.98 |
| 217.10 | 9.73 | -10.52 | 20.11 | 154.98 |
| 217.10 | 9.73 | -10.52 | 20.10 | 154.98 |
| 217.10 | 9.73 | -10.52 | 20.11 | 154.98 |
| 217.10 | 9.73 | -10.52 | 20.11 | 154.98 |
| 217.10 | 9.73 | -10.52 | 20.11 | 154.98 |
| 217.10 | 9.73 | -10.52 | 20.11 | 154.98 |
| 217.10 | 9.73 | -10.52 | 20.11 | 154.98 |
| 217.10 | 9.73 | -10.52 | 20.11 | 154.98 |
| 217.10 | 9.73 | -10.52 | 20.11 | 154.98 |
| 217.10 | 9.73 | -10.52 | 20.11 | 154.98 |
| 217.10 | 9.73 | -10.52 | 20.11 | 154.98 |
| 217.10 | 9.73 | -10.52 | 20.11 | 154.98 |
| 217.10 | 9.74 | -10.52 | 20.11 | 154.98 |
| 217.10 | 9.73 | -10.52 | 20.11 | 154.98 |
| 217.10 | 9.73 | -10.52 | 20.11 | 154.98 |
| 217.10 | 9.73 | -10.52 | 20.11 | 154.98 |
| 217.10 | 9.73 | -10.52 | 20.11 | 154.98 |
| 217.10 | 9.73 | -10.52 | 20.11 | 154.98 |
| 217.10 | 9.73 | -10.52 | 20.11 | 154.98 |
| 217.10 | 9.73 | -10.52 | 20.11 | 154.98 |
| 217.10 | 9.73 | -10.52 | 20.10 | 154.98 |
| 217.10 | 9.73 | -10.52 | 20.11 | 154.98 |
| 217.10 | 9.73 | -10.52 | 20.11 | 154.98 |
| 217.10 | 9.73 | -10.52 | 20.11 | 154.98 |
| 217.10 | 9.73 | -10.52 | 20.10 | 154.98 |







|        |      |        |       |        |
|--------|------|--------|-------|--------|
| 217.10 | 9.74 | -10.52 | 20.11 | 154.98 |
| 217.10 | 9.73 | -10.52 | 20.11 | 154.98 |
| 217.10 | 9.73 | -10.52 | 20.11 | 154.98 |
| 217.10 | 9.74 | -10.52 | 20.11 | 154.98 |
| 217.10 | 9.73 | -10.52 | 20.11 | 154.98 |
| 217.10 | 9.73 | -10.52 | 20.11 | 154.98 |
| 217.10 | 9.73 | -10.52 | 20.11 | 154.98 |
| 217.10 | 9.73 | -10.52 | 20.10 | 154.98 |
| 217.10 | 9.73 | -10.52 | 20.11 | 154.98 |
| 217.10 | 9.73 | -10.52 | 20.10 | 154.98 |
| 217.10 | 9.73 | -10.52 | 20.11 | 154.98 |
| 217.10 | 9.73 | -10.52 | 20.11 | 154.98 |
| 217.10 | 9.74 | -10.52 | 20.11 | 154.98 |
| 217.10 | 9.73 | -10.52 | 20.10 | 154.98 |
| 217.10 | 9.73 | -10.52 | 20.11 | 154.98 |
| 217.10 | 9.73 | -10.52 | 20.11 | 154.98 |
| 217.10 | 9.73 | -10.52 | 20.10 | 154.98 |
| 217.10 | 9.73 | -10.52 | 20.11 | 154.98 |
| 217.10 | 9.73 | -10.52 | 20.11 | 154.98 |
| 217.10 | 9.73 | -10.52 | 20.10 | 154.98 |
| 217.10 | 9.73 | -10.52 | 20.11 | 154.98 |
| 217.10 | 9.73 | -10.52 | 20.11 | 154.98 |
| 217.10 | 9.73 | -10.52 | 20.11 | 154.98 |
| 217.10 | 9.73 | -10.52 | 20.11 | 154.98 |
| 217.10 | 9.73 | -10.52 | 20.11 | 154.98 |
| 217.10 | 9.73 | -10.52 | 20.11 | 154.98 |
| 217.10 | 9.73 | -10.52 | 20.11 | 154.98 |
| 217.10 | 9.73 | -10.52 | 20.11 | 154.98 |
| 217.10 | 9.73 | -10.52 | 20.11 | 154.98 |
| 217.10 | 9.73 | -10.52 | 20.11 | 154.98 |
| 217.10 | 9.73 | -10.52 | 20.11 | 154.98 |
| 217.10 | 9.73 | -10.52 | 20.11 | 154.98 |
| 217.10 | 9.73 | -10.52 | 20.11 | 154.98 |
| 217.10 | 9.73 | -10.52 | 20.11 | 154.98 |
| 217.10 | 9.73 | -10.52 | 20.10 | 154.98 |
| 217.10 | 9.73 | -10.52 | 20.11 | 154.98 |
| 217.10 | 9.73 | -10.52 | 20.11 | 154.98 |
| 217.10 | 9.73 | -10.52 | 20.11 | 154.98 |

|        |      |        |       |        |
|--------|------|--------|-------|--------|
| 217.10 | 9.73 | -10.52 | 20.11 | 154.98 |
| 217.10 | 9.73 | -10.52 | 20.11 | 154.98 |
| 217.10 | 9.73 | -10.52 | 20.11 | 154.98 |
| 217.10 | 9.73 | -10.52 | 20.11 | 154.98 |
| 217.10 | 9.73 | -10.52 | 20.11 | 154.98 |
| 217.10 | 9.73 | -10.52 | 20.11 | 154.98 |
| 217.10 | 9.73 | -10.52 | 20.11 | 154.98 |
| 217.10 | 9.73 | -10.52 | 20.11 | 154.98 |
| 217.10 | 9.73 | -10.52 | 20.11 | 154.98 |
| 217.10 | 9.73 | -10.52 | 20.10 | 154.98 |
| 217.10 | 9.73 | -10.52 | 20.11 | 154.98 |
| 217.10 | 9.73 | -10.52 | 20.11 | 154.98 |
| 217.10 | 9.73 | -10.52 | 20.11 | 154.98 |
| 217.10 | 9.73 | -10.52 | 20.11 | 154.98 |
| 217.10 | 9.73 | -10.52 | 20.11 | 154.98 |
| 217.10 | 9.73 | -10.52 | 20.11 | 154.98 |
| 217.10 | 9.74 | -10.52 | 20.11 | 154.98 |
| 217.10 | 9.73 | -10.52 | 20.11 | 154.98 |
| 217.10 | 9.73 | -10.52 | 20.11 | 154.98 |
| 217.10 | 9.73 | -10.52 | 20.10 | 154.98 |
| 217.10 | 9.73 | -10.52 | 20.10 | 154.98 |
| 217.10 | 9.73 | -10.52 | 20.11 | 154.98 |
| 217.10 | 9.73 | -10.52 | 20.11 | 154.98 |
| 217.10 | 9.73 | -10.52 | 20.11 | 154.98 |
| 217.10 | 9.73 | -10.52 | 20.11 | 154.98 |
| 217.10 | 9.73 | -10.52 | 20.11 | 154.98 |
| 217.10 | 9.73 | -10.52 | 20.11 | 154.98 |
| 217.10 | 9.73 | -10.52 | 20.11 | 154.98 |
| 217.10 | 9.73 | -10.52 | 20.11 | 154.98 |
| 217.10 | 9.73 | -10.52 | 20.11 | 154.98 |
| 217.10 | 9.73 | -10.52 | 20.11 | 154.98 |
| 217.10 | 9.73 | -10.52 | 20.10 | 154.98 |
| 217.10 | 9.73 | -10.52 | 20.11 | 154.98 |
| 217.10 | 9.73 | -10.52 | 20.11 | 154.98 |
| 217.10 | 9.73 | -10.52 | 20.10 | 154.98 |
| 217.10 | 9.73 | -10.52 | 20.11 | 154.98 |
| 217.10 | 9.73 | -10.52 | 20.11 | 154.98 |







|        |      |        |       |        |
|--------|------|--------|-------|--------|
| 217.10 | 9.73 | -10.52 | 20.10 | 154.98 |
| 217.10 | 9.73 | -10.52 | 20.11 | 154.98 |
| 217.10 | 9.73 | -10.52 | 20.11 | 154.98 |
| 217.10 | 9.73 | -10.52 | 20.10 | 154.98 |
| 217.10 | 9.74 | -10.52 | 20.11 | 154.98 |
| 217.10 | 9.73 | -10.52 | 20.11 | 154.98 |
| 217.10 | 9.73 | -10.52 | 20.11 | 154.98 |
| 217.10 | 9.73 | -10.52 | 20.11 | 154.98 |
| 217.10 | 9.73 | -10.52 | 20.10 | 154.98 |
| 217.10 | 9.73 | -10.52 | 20.11 | 154.98 |
| 217.10 | 9.73 | -10.52 | 20.11 | 154.98 |
| 217.10 | 9.73 | -10.52 | 20.11 | 154.98 |
| 217.10 | 9.73 | -10.52 | 20.10 | 154.98 |
| 217.10 | 9.73 | -10.52 | 20.11 | 154.98 |
| 217.10 | 9.73 | -10.52 | 20.11 | 154.98 |
| 217.10 | 9.73 | -10.52 | 20.10 | 154.98 |
| 217.10 | 9.73 | -10.52 | 20.11 | 154.98 |
| 217.10 | 9.73 | -10.52 | 20.11 | 154.98 |
| 217.10 | 9.73 | -10.52 | 20.11 | 154.98 |
| 217.10 | 9.73 | -10.52 | 20.10 | 154.98 |
| 217.10 | 9.73 | -10.52 | 20.11 | 154.98 |
| 217.10 | 9.73 | -10.52 | 20.11 | 154.98 |
| 217.10 | 9.73 | -10.52 | 20.11 | 154.98 |
| 217.10 | 9.73 | -10.52 | 20.11 | 154.98 |
| 217.10 | 9.73 | -10.52 | 20.11 | 154.98 |
| 217.10 | 9.73 | -10.52 | 20.11 | 154.98 |
| 217.10 | 9.73 | -10.52 | 20.11 | 154.98 |
| 217.10 | 9.73 | -10.52 | 20.11 | 154.98 |
| 217.10 | 9.73 | -10.52 | 20.11 | 154.98 |
| 217.10 | 9.73 | -10.52 | 20.11 | 154.98 |
| 217.10 | 9.73 | -10.52 | 20.10 | 154.98 |
| 217.10 | 9.73 | -10.52 | 20.11 | 154.98 |
| 217.10 | 9.73 | -10.52 | 20.10 | 154.98 |
| 217.10 | 9.73 | -10.52 | 20.11 | 154.98 |
| 217.10 | 9.73 | -10.52 | 20.11 | 154.98 |
| 217.10 | 9.73 | -10.52 | 20.11 | 154.98 |









|        |      |        |       |        |
|--------|------|--------|-------|--------|
| 217.10 | 9.73 | -10.52 | 20.11 | 154.98 |
| 217.10 | 9.73 | -10.52 | 20.10 | 154.98 |
| 217.10 | 9.73 | -10.52 | 20.11 | 154.98 |
| 217.10 | 9.73 | -10.52 | 20.11 | 154.98 |
| 217.10 | 9.73 | -10.52 | 20.11 | 154.98 |
| 217.10 | 9.73 | -10.52 | 20.11 | 154.98 |
| 217.10 | 9.73 | -10.52 | 20.11 | 154.98 |
| 217.10 | 9.73 | -10.52 | 20.11 | 154.98 |
| 217.10 | 9.73 | -10.52 | 20.11 | 154.98 |
| 217.10 | 9.73 | -10.52 | 20.11 | 154.98 |
| 217.10 | 9.73 | -10.52 | 20.11 | 154.98 |
| 217.10 | 9.73 | -10.52 | 20.11 | 154.98 |
| 217.10 | 9.73 | -10.52 | 20.11 | 154.98 |
| 217.10 | 9.73 | -10.52 | 20.11 | 154.98 |
| 217.10 | 9.73 | -10.52 | 20.11 | 154.98 |
| 217.10 | 9.73 | -10.52 | 20.11 | 154.98 |
| 217.10 | 9.73 | -10.52 | 20.11 | 154.98 |
| 217.10 | 9.73 | -10.52 | 20.11 | 154.98 |
| 217.10 | 9.73 | -10.52 | 20.11 | 154.98 |
| 217.10 | 9.73 | -10.52 | 20.11 | 154.98 |
| 217.10 | 9.73 | -10.52 | 20.11 | 154.98 |
| 217.10 | 9.73 | -10.52 | 20.11 | 154.98 |
| 217.10 | 9.73 | -10.52 | 20.11 | 154.98 |
| 217.10 | 9.73 | -10.52 | 20.11 | 154.98 |
| 217.10 | 9.73 | -10.52 | 20.11 | 154.98 |
| 217.10 | 9.73 | -10.52 | 20.11 | 154.98 |
| 217.10 | 9.73 | -10.52 | 20.11 | 154.98 |
| 217.10 | 9.73 | -10.52 | 20.11 | 154.98 |
| 217.10 | 9.73 | -10.52 | 20.11 | 154.98 |
| 217.10 | 9.73 | -10.52 | 20.11 | 154.98 |
| 217.10 | 9.73 | -10.52 | 20.11 | 154.98 |
| 217.10 | 9.73 | -10.52 | 20.11 | 154.98 |
| 217.10 | 9.73 | -10.52 | 20.10 | 154.98 |
| 217.10 | 9.73 | -10.52 | 20.11 | 154.98 |



|        |      |        |       |        |
|--------|------|--------|-------|--------|
| 217.10 | 9.73 | -10.52 | 20.11 | 154.98 |
| 217.10 | 9.73 | -10.52 | 20.10 | 154.98 |
| 217.10 | 9.73 | -10.52 | 20.11 | 154.98 |
| 217.10 | 9.73 | -10.52 | 20.11 | 154.98 |
| 217.10 | 9.73 | -10.52 | 20.11 | 154.98 |
| 217.10 | 9.73 | -10.52 | 20.11 | 154.98 |
| 217.10 | 9.73 | -10.52 | 20.11 | 154.98 |
| 217.10 | 9.73 | -10.52 | 20.10 | 154.98 |
| 217.10 | 9.73 | -10.52 | 20.11 | 154.98 |
| 217.10 | 9.73 | -10.52 | 20.11 | 154.98 |
| 217.10 | 9.73 | -10.52 | 20.11 | 154.98 |
| 217.10 | 9.73 | -10.52 | 20.11 | 154.98 |
| 217.10 | 9.73 | -10.52 | 20.11 | 154.98 |
| 217.10 | 9.73 | -10.52 | 20.11 | 154.98 |
| 217.10 | 9.73 | -10.52 | 20.11 | 154.98 |
| 217.10 | 9.73 | -10.52 | 20.11 | 154.98 |
| 217.10 | 9.73 | -10.52 | 20.10 | 154.98 |
| 217.10 | 9.73 | -10.52 | 20.11 | 154.98 |
| 217.10 | 9.73 | -10.52 | 20.11 | 154.98 |
| 217.10 | 9.73 | -10.52 | 20.11 | 154.98 |
| 217.10 | 9.73 | -10.52 | 20.11 | 154.98 |
| 217.10 | 9.73 | -10.52 | 20.11 | 154.98 |
| 217.10 | 9.73 | -10.52 | 20.11 | 154.98 |
| 217.10 | 9.74 | -10.52 | 20.11 | 154.98 |
| 217.10 | 9.73 | -10.52 | 20.11 | 154.98 |
| 217.10 | 9.73 | -10.52 | 20.11 | 154.98 |
| 217.10 | 9.73 | -10.52 | 20.11 | 154.98 |
| 217.10 | 9.73 | -10.52 | 20.10 | 154.98 |
| 217.10 | 9.73 | -10.52 | 20.11 | 154.98 |
| 217.10 | 9.73 | -10.52 | 20.11 | 154.98 |
| 217.10 | 9.73 | -10.52 | 20.11 | 154.98 |
| 217.10 | 9.73 | -10.52 | 20.11 | 154.98 |
| 217.10 | 9.73 | -10.52 | 20.10 | 154.98 |
| 217.10 | 9.73 | -10.52 | 20.11 | 154.98 |
| 217.10 | 9.73 | -10.52 | 20.11 | 154.98 |
| 217.10 | 9.73 | -10.52 | 20.11 | 154.98 |
| 217.10 | 9.73 | -10.52 | 20.10 | 154.98 |
| 217.10 | 9.73 | -10.52 | 20.10 | 154.98 |
| 217.10 | 9.73 | -10.52 | 20.11 | 154.98 |







|        |      |        |       |        |
|--------|------|--------|-------|--------|
| 217.10 | 9.73 | -10.52 | 20.11 | 154.98 |
| 217.10 | 9.73 | -10.52 | 20.11 | 154.98 |
| 217.10 | 9.73 | -10.52 | 20.11 | 154.98 |
| 217.10 | 9.74 | -10.52 | 20.11 | 154.98 |
| 217.10 | 9.73 | -10.52 | 20.11 | 154.98 |
| 217.10 | 9.73 | -10.52 | 20.11 | 154.98 |
| 217.10 | 9.73 | -10.52 | 20.11 | 154.98 |
| 217.10 | 9.73 | -10.52 | 20.11 | 154.98 |
| 217.10 | 9.73 | -10.52 | 20.11 | 154.98 |
| 217.10 | 9.73 | -10.52 | 20.11 | 154.98 |
| 217.10 | 9.73 | -10.52 | 20.11 | 154.98 |
| 217.10 | 9.73 | -10.52 | 20.11 | 154.98 |
| 217.10 | 9.73 | -10.52 | 20.11 | 154.98 |
| 217.10 | 9.73 | -10.52 | 20.11 | 154.98 |
| 217.10 | 9.73 | -10.52 | 20.11 | 154.98 |
| 217.10 | 9.73 | -10.52 | 20.11 | 154.98 |
| 217.10 | 9.73 | -10.52 | 20.11 | 154.98 |
| 217.10 | 9.73 | -10.52 | 20.11 | 154.98 |
| 217.10 | 9.73 | -10.52 | 20.11 | 154.98 |
| 217.10 | 9.73 | -10.52 | 20.11 | 154.98 |
| 217.10 | 9.73 | -10.52 | 20.11 | 154.98 |
| 217.10 | 9.73 | -10.52 | 20.11 | 154.98 |
| 217.10 | 9.73 | -10.52 | 20.11 | 154.98 |
| 217.10 | 9.73 | -10.52 | 20.11 | 154.98 |
| 217.10 | 9.73 | -10.52 | 20.11 | 154.98 |
| 217.10 | 9.73 | -10.52 | 20.11 | 154.98 |
| 217.10 | 9.73 | -10.52 | 20.11 | 154.98 |
| 217.10 | 9.73 | -10.52 | 20.11 | 154.98 |
| 217.10 | 9.73 | -10.52 | 20.11 | 154.98 |
| 217.10 | 9.73 | -10.52 | 20.11 | 154.98 |
| 217.10 | 9.73 | -10.52 | 20.11 | 154.98 |
| 217.10 | 9.73 | -10.52 | 20.11 | 154.98 |
| 217.10 | 9.74 | -10.52 | 20.11 | 154.98 |
| 217.10 | 9.73 | -10.52 | 20.11 | 154.98 |
| 217.10 | 9.73 | -10.52 | 20.11 | 154.98 |





















|        |      |        |       |        |
|--------|------|--------|-------|--------|
| 217.10 | 9.73 | -10.52 | 20.11 | 154.98 |
| 217.10 | 9.73 | -10.52 | 20.11 | 154.98 |
| 217.10 | 9.73 | -10.52 | 20.10 | 154.98 |
| 217.10 | 9.73 | -10.52 | 20.10 | 154.98 |
| 217.10 | 9.73 | -10.52 | 20.11 | 154.98 |
| 217.10 | 9.73 | -10.52 | 20.11 | 154.98 |
| 217.10 | 9.73 | -10.52 | 20.11 | 154.98 |
| 217.10 | 9.73 | -10.52 | 20.11 | 154.98 |
| 217.10 | 9.74 | -10.52 | 20.11 | 154.98 |
| 217.10 | 9.73 | -10.52 | 20.10 | 154.98 |
| 217.10 | 9.73 | -10.52 | 20.11 | 154.98 |
| 217.10 | 9.73 | -10.52 | 20.11 | 154.98 |
| 217.10 | 9.73 | -10.52 | 20.11 | 154.98 |
| 217.10 | 9.73 | -10.52 | 20.11 | 154.98 |
| 217.10 | 9.73 | -10.52 | 20.11 | 154.98 |
| 217.10 | 9.73 | -10.52 | 20.11 | 154.98 |
| 217.10 | 9.73 | -10.52 | 20.11 | 154.98 |
| 217.10 | 9.73 | -10.52 | 20.11 | 154.98 |
| 217.10 | 9.73 | -10.52 | 20.11 | 154.98 |
| 217.10 | 9.73 | -10.52 | 20.11 | 154.98 |
| 217.10 | 9.73 | -10.52 | 20.11 | 154.98 |
| 217.10 | 9.73 | -10.52 | 20.11 | 154.98 |
| 217.10 | 9.73 | -10.52 | 20.11 | 154.98 |
| 217.10 | 9.73 | -10.52 | 20.11 | 154.98 |
| 217.10 | 9.73 | -10.52 | 20.11 | 154.98 |
| 217.10 | 9.73 | -10.52 | 20.11 | 154.98 |
| 217.10 | 9.73 | -10.52 | 20.11 | 154.98 |
| 217.10 | 9.73 | -10.52 | 20.11 | 154.98 |
| 217.10 | 9.73 | -10.52 | 20.11 | 154.98 |
| 217.10 | 9.73 | -10.52 | 20.11 | 154.98 |
| 217.10 | 9.73 | -10.52 | 20.11 | 154.98 |
| 217.10 | 9.74 | -10.52 | 20.11 | 154.98 |
| 217.10 | 9.73 | -10.52 | 20.11 | 154.98 |
| 217.10 | 9.73 | -10.52 | 20.10 | 154.98 |
| 217.10 | 9.74 | -10.52 | 20.11 | 154.98 |
| 217.10 | 9.73 | -10.52 | 20.10 | 154.98 |
| 217.10 | 9.73 | -10.52 | 20.11 | 154.98 |
| 217.10 | 9.74 | -10.52 | 20.11 | 154.98 |









|        |      |        |       |        |
|--------|------|--------|-------|--------|
| 217.10 | 9.73 | -10.52 | 20.11 | 154.98 |
| 217.10 | 9.73 | -10.52 | 20.11 | 154.98 |
| 217.10 | 9.73 | -10.52 | 20.11 | 154.98 |
| 217.10 | 9.73 | -10.52 | 20.11 | 154.98 |
| 217.10 | 9.73 | -10.52 | 20.11 | 154.98 |
| 217.10 | 9.73 | -10.52 | 20.11 | 154.98 |
| 217.10 | 9.73 | -10.52 | 20.11 | 154.98 |
| 217.10 | 9.73 | -10.52 | 20.11 | 154.98 |
| 217.10 | 9.73 | -10.52 | 20.11 | 154.98 |
| 217.10 | 9.73 | -10.52 | 20.11 | 154.98 |
| 217.10 | 9.73 | -10.52 | 20.11 | 154.98 |
| 217.10 | 9.73 | -10.52 | 20.11 | 154.98 |
| 217.10 | 9.73 | -10.52 | 20.11 | 154.98 |
| 217.10 | 9.73 | -10.52 | 20.11 | 154.98 |
| 217.10 | 9.73 | -10.52 | 20.11 | 154.98 |
| 217.10 | 9.73 | -10.52 | 20.11 | 154.98 |
| 217.10 | 9.73 | -10.52 | 20.11 | 154.98 |
| 217.10 | 9.73 | -10.52 | 20.11 | 154.98 |
| 217.10 | 9.73 | -10.52 | 20.11 | 154.98 |
| 217.10 | 9.73 | -10.52 | 20.11 | 154.98 |
| 217.10 | 9.73 | -10.52 | 20.11 | 154.98 |
| 217.10 | 9.73 | -10.52 | 20.11 | 154.98 |
| 217.10 | 9.73 | -10.52 | 20.11 | 154.98 |
| 217.10 | 9.73 | -10.52 | 20.11 | 154.98 |
| 217.10 | 9.73 | -10.52 | 20.11 | 154.98 |
| 217.10 | 9.73 | -10.52 | 20.11 | 154.98 |
| 217.10 | 9.73 | -10.52 | 20.11 | 154.98 |
| 217.10 | 9.73 | -10.52 | 20.11 | 154.98 |
| 217.10 | 9.73 | -10.52 | 20.11 | 154.98 |
| 217.10 | 9.74 | -10.52 | 20.11 | 154.98 |
| 217.10 | 9.73 | -10.52 | 20.11 | 154.98 |
| 217.10 | 9.73 | -10.52 | 20.11 | 154.98 |
| 217.10 | 9.73 | -10.52 | 20.11 | 154.98 |
| 217.10 | 9.73 | -10.52 | 20.11 | 154.98 |
| 217.10 | 9.74 | -10.52 | 20.11 | 154.98 |

















|        |      |        |       |        |
|--------|------|--------|-------|--------|
| 217.10 | 9.73 | -10.52 | 20.11 | 154.98 |
| 217.10 | 9.73 | -10.52 | 20.11 | 154.98 |
| 217.10 | 9.73 | -10.52 | 20.11 | 154.98 |
| 217.10 | 9.73 | -10.52 | 20.10 | 154.98 |
| 217.10 | 9.73 | -10.52 | 20.11 | 154.98 |
| 217.10 | 9.73 | -10.52 | 20.11 | 154.98 |
| 217.10 | 9.73 | -10.52 | 20.11 | 154.98 |
| 217.10 | 9.73 | -10.52 | 20.11 | 154.98 |
| 217.10 | 9.73 | -10.52 | 20.11 | 154.98 |
| 217.10 | 9.73 | -10.52 | 20.11 | 154.98 |
| 217.10 | 9.73 | -10.52 | 20.11 | 154.98 |
| 217.10 | 9.73 | -10.52 | 20.11 | 154.98 |
| 217.10 | 9.73 | -10.52 | 20.11 | 154.98 |
| 217.10 | 9.73 | -10.52 | 20.11 | 154.98 |
| 217.10 | 9.73 | -10.52 | 20.11 | 154.98 |
| 217.10 | 9.73 | -10.52 | 20.11 | 154.98 |
| 217.10 | 9.73 | -10.52 | 20.11 | 154.98 |
| 217.10 | 9.73 | -10.52 | 20.11 | 154.98 |
| 217.10 | 9.73 | -10.52 | 20.11 | 154.98 |
| 217.10 | 9.73 | -10.52 | 20.11 | 154.98 |
| 217.10 | 9.73 | -10.52 | 20.11 | 154.98 |
| 217.10 | 9.73 | -10.52 | 20.11 | 154.98 |
| 217.10 | 9.73 | -10.52 | 20.11 | 154.98 |
| 217.10 | 9.73 | -10.52 | 20.11 | 154.98 |
| 217.10 | 9.73 | -10.52 | 20.11 | 154.98 |
| 217.10 | 9.73 | -10.52 | 20.11 | 154.98 |
| 217.10 | 9.73 | -10.52 | 20.11 | 154.98 |
| 217.10 | 9.73 | -10.52 | 20.11 | 154.98 |
| 217.10 | 9.73 | -10.52 | 20.11 | 154.98 |
| 217.10 | 9.73 | -10.52 | 20.11 | 154.98 |
| 217.10 | 9.73 | -10.52 | 20.11 | 154.98 |
| 217.10 | 9.73 | -10.52 | 20.11 | 154.98 |
| 217.10 | 9.73 | -10.52 | 20.11 | 154.98 |
| 217.10 | 9.74 | -10.52 | 20.11 | 154.98 |
| 217.10 | 9.73 | -10.52 | 20.11 | 154.98 |
| 217.10 | 9.73 | -10.52 | 20.10 | 154.98 |
| 217.10 | 9.73 | -10.52 | 20.11 | 154.98 |

















|        |      |        |       |        |
|--------|------|--------|-------|--------|
| 217.10 | 9.73 | -10.52 | 20.11 | 154.98 |
| 217.10 | 9.73 | -10.52 | 20.11 | 154.98 |
| 217.10 | 9.73 | -10.52 | 20.11 | 154.98 |
| 217.10 | 9.73 | -10.52 | 20.11 | 154.98 |
| 217.10 | 9.73 | -10.52 | 20.11 | 154.98 |
| 217.10 | 9.73 | -10.52 | 20.11 | 154.98 |
| 217.10 | 9.73 | -10.52 | 20.11 | 154.98 |
| 217.10 | 9.73 | -10.52 | 20.11 | 154.98 |
| 217.10 | 9.73 | -10.52 | 20.11 | 154.98 |
| 217.10 | 9.73 | -10.52 | 20.11 | 154.98 |
| 217.10 | 9.73 | -10.52 | 20.11 | 154.98 |
| 217.10 | 9.73 | -10.52 | 20.11 | 154.98 |
| 217.10 | 9.73 | -10.52 | 20.11 | 154.98 |
| 217.10 | 9.73 | -10.52 | 20.11 | 154.98 |
| 217.10 | 9.73 | -10.52 | 20.11 | 154.98 |
| 217.10 | 9.73 | -10.52 | 20.11 | 154.98 |
| 217.10 | 9.73 | -10.52 | 20.11 | 154.98 |
| 217.10 | 9.73 | -10.52 | 20.11 | 154.98 |
| 217.10 | 9.73 | -10.52 | 20.11 | 154.98 |
| 217.10 | 9.73 | -10.52 | 20.11 | 154.98 |
| 217.10 | 9.73 | -10.52 | 20.11 | 154.98 |
| 217.10 | 9.73 | -10.52 | 20.11 | 154.98 |
| 217.10 | 9.73 | -10.52 | 20.11 | 154.98 |
| 217.10 | 9.73 | -10.52 | 20.11 | 154.98 |
| 217.10 | 9.73 | -10.52 | 20.11 | 154.98 |
| 217.10 | 9.73 | -10.52 | 20.11 | 154.98 |
| 217.10 | 9.73 | -10.52 | 20.11 | 154.98 |
| 217.10 | 9.74 | -10.52 | 20.11 | 154.98 |
| 217.10 | 9.73 | -10.52 | 20.11 | 154.98 |
| 217.10 | 9.73 | -10.52 | 20.11 | 154.98 |
| 217.10 | 9.73 | -10.52 | 20.11 | 154.98 |





















|        |      |        |       |        |
|--------|------|--------|-------|--------|
| 217.10 | 9.73 | -10.52 | 20.10 | 154.98 |
| 217.10 | 9.73 | -10.52 | 20.11 | 154.98 |
| 217.10 | 9.73 | -10.52 | 20.11 | 154.98 |
| 217.10 | 9.73 | -10.52 | 20.11 | 154.98 |
| 217.10 | 9.73 | -10.52 | 20.10 | 154.98 |
| 217.10 | 9.73 | -10.52 | 20.11 | 154.98 |
| 217.10 | 9.73 | -10.52 | 20.11 | 154.98 |
| 217.10 | 9.73 | -10.52 | 20.11 | 154.98 |
| 217.10 | 9.73 | -10.52 | 20.11 | 154.98 |
| 217.10 | 9.73 | -10.52 | 20.11 | 154.98 |
| 217.10 | 9.73 | -10.52 | 20.11 | 154.98 |
| 217.10 | 9.73 | -10.52 | 20.11 | 154.98 |
| 217.10 | 9.73 | -10.52 | 20.11 | 154.98 |
| 217.10 | 9.73 | -10.52 | 20.11 | 154.98 |
| 217.10 | 9.73 | -10.52 | 20.11 | 154.98 |
| 217.10 | 9.73 | -10.52 | 20.11 | 154.98 |
| 217.10 | 9.74 | -10.52 | 20.11 | 154.98 |
| 217.10 | 9.73 | -10.52 | 20.11 | 154.98 |
| 217.10 | 9.73 | -10.52 | 20.11 | 154.98 |
| 217.10 | 9.73 | -10.52 | 20.11 | 154.98 |
| 217.10 | 9.73 | -10.52 | 20.11 | 154.98 |
| 217.10 | 9.73 | -10.52 | 20.11 | 154.98 |
| 217.10 | 9.73 | -10.52 | 20.11 | 154.98 |
| 217.10 | 9.73 | -10.52 | 20.11 | 154.98 |
| 217.10 | 9.73 | -10.52 | 20.11 | 154.98 |
| 217.10 | 9.73 | -10.52 | 20.11 | 154.98 |
| 217.10 | 9.74 | -10.52 | 20.11 | 154.98 |
| 217.10 | 9.73 | -10.52 | 20.11 | 154.98 |
| 217.10 | 9.73 | -10.52 | 20.11 | 154.98 |
| 217.10 | 9.73 | -10.52 | 20.10 | 154.98 |
| 217.10 | 9.73 | -10.52 | 20.11 | 154.98 |
| 217.10 | 9.73 | -10.52 | 20.11 | 154.98 |
| 217.10 | 9.73 | -10.52 | 20.11 | 154.98 |
| 217.10 | 9.73 | -10.52 | 20.10 | 154.98 |
| 217.10 | 9.73 | -10.52 | 20.11 | 154.98 |
| 217.10 | 9.73 | -10.52 | 20.10 | 154.98 |
| 217.10 | 9.73 | -10.52 | 20.11 | 154.98 |
| 217.10 | 9.73 | -10.52 | 20.11 | 154.98 |















|        |      |        |       |        |
|--------|------|--------|-------|--------|
| 217.10 | 9.73 | -10.52 | 20.11 | 154.98 |
| 217.10 | 9.73 | -10.52 | 20.11 | 154.98 |
| 217.10 | 9.73 | -10.52 | 20.11 | 154.98 |
| 217.10 | 9.73 | -10.52 | 20.11 | 154.98 |
| 217.10 | 9.73 | -10.52 | 20.11 | 154.98 |
| 217.10 | 9.73 | -10.52 | 20.11 | 154.98 |
| 217.10 | 9.73 | -10.52 | 20.11 | 154.98 |
| 217.10 | 9.73 | -10.52 | 20.11 | 154.98 |
| 217.10 | 9.73 | -10.52 | 20.11 | 154.98 |
| 217.10 | 9.73 | -10.52 | 20.11 | 154.98 |
| 217.10 | 9.73 | -10.52 | 20.10 | 154.98 |
| 217.10 | 9.73 | -10.52 | 20.11 | 154.98 |
| 217.10 | 9.73 | -10.52 | 20.11 | 154.98 |
| 217.10 | 9.73 | -10.52 | 20.11 | 154.98 |
| 217.10 | 9.73 | -10.52 | 20.11 | 154.98 |
| 217.10 | 9.73 | -10.52 | 20.11 | 154.98 |
| 217.10 | 9.73 | -10.52 | 20.11 | 154.98 |
| 217.10 | 9.73 | -10.52 | 20.11 | 154.98 |
| 217.10 | 9.73 | -10.52 | 20.11 | 154.98 |
| 217.10 | 9.73 | -10.52 | 20.11 | 154.98 |
| 217.10 | 9.73 | -10.52 | 20.11 | 154.98 |
| 217.10 | 9.74 | -10.52 | 20.11 | 154.98 |
| 217.10 | 9.73 | -10.52 | 20.11 | 154.98 |
| 217.10 | 9.73 | -10.52 | 20.11 | 154.98 |
| 217.10 | 9.73 | -10.52 | 20.11 | 154.98 |
| 217.10 | 9.73 | -10.52 | 20.10 | 154.98 |
| 217.10 | 9.73 | -10.52 | 20.11 | 154.98 |
| 217.10 | 9.73 | -10.52 | 20.10 | 154.98 |
| 217.10 | 9.73 | -10.52 | 20.11 | 154.98 |
| 217.10 | 9.73 | -10.52 | 20.10 | 154.98 |
| 217.10 | 9.73 | -10.52 | 20.11 | 154.98 |
| 217.10 | 9.73 | -10.52 | 20.11 | 154.98 |
| 217.10 | 9.73 | -10.52 | 20.11 | 154.98 |
| 217.10 | 9.73 | -10.52 | 20.11 | 154.98 |
| 217.10 | 9.73 | -10.52 | 20.11 | 154.98 |
| 217.10 | 9.73 | -10.52 | 20.11 | 154.98 |
| 217.10 | 9.73 | -10.52 | 20.11 | 154.98 |
| 217.10 | 9.74 | -10.52 | 20.11 | 154.98 |









|        |      |        |       |        |
|--------|------|--------|-------|--------|
| 217.10 | 9.73 | -10.52 | 20.11 | 154.98 |
| 217.10 | 9.73 | -10.52 | 20.11 | 154.98 |
| 217.10 | 9.73 | -10.52 | 20.11 | 154.98 |
| 217.10 | 9.73 | -10.52 | 20.11 | 154.98 |
| 217.10 | 9.73 | -10.52 | 20.10 | 154.98 |
| 217.10 | 9.73 | -10.52 | 20.11 | 154.98 |
| 217.10 | 9.73 | -10.52 | 20.11 | 154.98 |
| 217.10 | 9.73 | -10.52 | 20.11 | 154.98 |
| 217.10 | 9.73 | -10.52 | 20.11 | 154.98 |
| 217.10 | 9.73 | -10.52 | 20.10 | 154.98 |
| 217.10 | 9.73 | -10.52 | 20.11 | 154.98 |
| 217.10 | 9.73 | -10.52 | 20.11 | 154.98 |
| 217.10 | 9.73 | -10.52 | 20.11 | 154.98 |
| 217.10 | 9.73 | -10.52 | 20.11 | 154.98 |
| 217.10 | 9.73 | -10.52 | 20.11 | 154.98 |
| 217.10 | 9.73 | -10.52 | 20.11 | 154.98 |
| 217.10 | 9.73 | -10.52 | 20.11 | 154.98 |
| 217.10 | 9.73 | -10.52 | 20.11 | 154.98 |
| 217.10 | 9.73 | -10.52 | 20.11 | 154.98 |
| 217.10 | 9.73 | -10.52 | 20.11 | 154.98 |
| 217.10 | 9.73 | -10.52 | 20.11 | 154.98 |
| 217.10 | 9.73 | -10.52 | 20.11 | 154.98 |
| 217.10 | 9.73 | -10.52 | 20.11 | 154.98 |
| 217.10 | 9.73 | -10.52 | 20.11 | 154.98 |
| 217.10 | 9.73 | -10.52 | 20.11 | 154.98 |
| 217.10 | 9.73 | -10.52 | 20.11 | 154.98 |
| 217.10 | 9.74 | -10.52 | 20.11 | 154.98 |
| 217.10 | 9.73 | -10.52 | 20.10 | 154.98 |
| 217.10 | 9.73 | -10.52 | 20.10 | 154.98 |
| 217.10 | 9.73 | -10.52 | 20.11 | 154.98 |
| 217.10 | 9.73 | -10.52 | 20.11 | 154.98 |
| 217.10 | 9.73 | -10.52 | 20.11 | 154.98 |
| 217.10 | 9.73 | -10.52 | 20.11 | 154.98 |
| 217.10 | 9.73 | -10.52 | 20.11 | 154.98 |





















|        |      |        |       |        |
|--------|------|--------|-------|--------|
| 217.10 | 9.73 | -10.52 | 20.11 | 154.98 |
| 217.10 | 9.73 | -10.52 | 20.11 | 154.98 |
| 217.10 | 9.73 | -10.52 | 20.11 | 154.98 |
| 217.10 | 9.73 | -10.52 | 20.11 | 154.98 |
| 217.10 | 9.73 | -10.52 | 20.11 | 154.98 |
| 217.10 | 9.73 | -10.52 | 20.11 | 154.98 |
| 217.10 | 9.73 | -10.52 | 20.11 | 154.98 |
| 217.10 | 9.73 | -10.52 | 20.11 | 154.98 |
| 217.10 | 9.73 | -10.52 | 20.11 | 154.98 |
| 217.10 | 9.73 | -10.52 | 20.11 | 154.98 |
| 217.10 | 9.73 | -10.52 | 20.11 | 154.98 |
| 217.10 | 9.74 | -10.52 | 20.11 | 154.98 |
| 217.10 | 9.73 | -10.52 | 20.11 | 154.98 |
| 217.10 | 9.73 | -10.52 | 20.11 | 154.98 |
| 217.10 | 9.73 | -10.52 | 20.11 | 154.98 |
| 217.10 | 9.73 | -10.52 | 20.11 | 154.98 |
| 217.10 | 9.73 | -10.52 | 20.11 | 154.98 |
| 217.10 | 9.73 | -10.52 | 20.11 | 154.98 |
| 217.10 | 9.73 | -10.52 | 20.11 | 154.98 |
| 217.10 | 9.73 | -10.52 | 20.11 | 154.98 |
| 217.10 | 9.73 | -10.52 | 20.10 | 154.98 |
| 217.10 | 9.73 | -10.52 | 20.11 | 154.98 |
| 217.10 | 9.73 | -10.52 | 20.10 | 154.98 |
| 217.10 | 9.73 | -10.52 | 20.11 | 154.98 |
| 217.10 | 9.73 | -10.52 | 20.11 | 154.98 |
| 217.10 | 9.73 | -10.52 | 20.11 | 154.98 |
| 217.10 | 9.73 | -10.52 | 20.11 | 154.98 |
| 217.10 | 9.73 | -10.52 | 20.11 | 154.98 |
| 217.10 | 9.73 | -10.52 | 20.11 | 154.98 |
| 217.10 | 9.73 | -10.52 | 20.11 | 154.98 |
| 217.10 | 9.73 | -10.52 | 20.11 | 154.98 |
| 217.10 | 9.74 | -10.52 | 20.11 | 154.98 |
| 217.10 | 9.73 | -10.52 | 20.11 | 154.98 |
| 217.10 | 9.73 | -10.52 | 20.11 | 154.98 |
| 217.10 | 9.73 | -10.52 | 20.11 | 154.98 |
| 217.10 | 9.73 | -10.52 | 20.10 | 154.98 |















|        |      |        |       |        |
|--------|------|--------|-------|--------|
| 217.10 | 9.74 | -10.52 | 20.11 | 154.98 |
| 217.10 | 9.73 | -10.52 | 20.10 | 154.98 |
| 217.10 | 9.73 | -10.52 | 20.11 | 154.98 |
| 217.10 | 9.73 | -10.52 | 20.11 | 154.98 |
| 217.10 | 9.73 | -10.52 | 20.11 | 154.98 |
| 217.10 | 9.73 | -10.52 | 20.11 | 154.98 |
| 217.10 | 9.73 | -10.52 | 20.11 | 154.98 |
| 217.10 | 9.73 | -10.52 | 20.11 | 154.98 |
| 217.10 | 9.73 | -10.52 | 20.11 | 154.98 |
| 217.10 | 9.73 | -10.52 | 20.11 | 154.98 |
| 217.10 | 9.73 | -10.52 | 20.11 | 154.98 |
| 217.10 | 9.73 | -10.52 | 20.10 | 154.98 |
| 217.10 | 9.73 | -10.52 | 20.11 | 154.98 |
| 217.10 | 9.73 | -10.52 | 20.11 | 154.98 |
| 217.10 | 9.73 | -10.52 | 20.11 | 154.98 |
| 217.10 | 9.73 | -10.52 | 20.11 | 154.98 |
| 217.10 | 9.73 | -10.52 | 20.11 | 154.98 |
| 217.10 | 9.73 | -10.52 | 20.11 | 154.98 |
| 217.10 | 9.73 | -10.52 | 20.10 | 154.98 |
| 217.10 | 9.73 | -10.52 | 20.11 | 154.98 |
| 217.10 | 9.73 | -10.52 | 20.11 | 154.98 |
| 217.10 | 9.73 | -10.52 | 20.11 | 154.98 |
| 217.10 | 9.73 | -10.52 | 20.10 | 154.98 |
| 217.10 | 9.73 | -10.52 | 20.11 | 154.98 |
| 217.10 | 9.73 | -10.52 | 20.11 | 154.98 |
| 217.10 | 9.73 | -10.52 | 20.11 | 154.98 |
| 217.10 | 9.73 | -10.52 | 20.10 | 154.98 |
| 217.10 | 9.73 | -10.52 | 20.11 | 154.98 |
| 217.10 | 9.73 | -10.52 | 20.11 | 154.98 |
| 217.10 | 9.73 | -10.52 | 20.10 | 154.98 |
| 217.10 | 9.73 | -10.52 | 20.11 | 154.98 |
| 217.10 | 9.73 | -10.52 | 20.11 | 154.98 |
| 217.10 | 9.73 | -10.52 | 20.11 | 154.98 |

|        |      |        |       |        |
|--------|------|--------|-------|--------|
| 217.10 | 9.73 | -10.52 | 20.11 | 154.98 |
| 217.10 | 9.73 | -10.52 | 20.11 | 154.98 |
| 217.10 | 9.73 | -10.52 | 20.11 | 154.98 |
| 217.10 | 9.73 | -10.52 | 20.10 | 154.98 |
| 217.10 | 9.73 | -10.52 | 20.11 | 154.98 |
| 217.10 | 9.73 | -10.52 | 20.11 | 154.98 |
| 217.10 | 9.73 | -10.52 | 20.11 | 154.98 |
| 217.10 | 9.74 | -10.52 | 20.11 | 154.98 |
| 217.10 | 9.73 | -10.52 | 20.11 | 154.98 |
| 217.10 | 9.73 | -10.52 | 20.11 | 154.98 |
| 217.10 | 9.73 | -10.52 | 20.11 | 154.98 |
| 217.10 | 9.73 | -10.52 | 20.10 | 154.98 |
| 217.10 | 9.73 | -10.52 | 20.10 | 154.98 |
| 217.10 | 9.74 | -10.52 | 20.11 | 154.98 |
| 217.10 | 9.73 | -10.52 | 20.11 | 154.98 |
| 217.10 | 9.73 | -10.52 | 20.10 | 154.98 |
| 217.10 | 9.73 | -10.52 | 20.11 | 154.98 |
| 217.10 | 9.73 | -10.52 | 20.11 | 154.98 |
| 217.10 | 9.73 | -10.52 | 20.11 | 154.98 |
| 217.10 | 9.73 | -10.52 | 20.11 | 154.98 |
| 217.10 | 9.73 | -10.52 | 20.11 | 154.98 |
| 217.10 | 9.73 | -10.52 | 20.11 | 154.98 |
| 217.10 | 9.73 | -10.52 | 20.11 | 154.98 |
| 217.10 | 9.73 | -10.52 | 20.11 | 154.98 |
| 217.10 | 9.73 | -10.52 | 20.11 | 154.98 |
| 217.10 | 9.73 | -10.52 | 20.11 | 154.98 |
| 217.10 | 9.73 | -10.52 | 20.11 | 154.98 |
| 217.10 | 9.73 | -10.52 | 20.11 | 154.98 |
| 217.10 | 9.73 | -10.52 | 20.11 | 154.98 |
| 217.10 | 9.73 | -10.52 | 20.11 | 154.98 |
| 217.10 | 9.73 | -10.52 | 20.11 | 154.98 |
| 217.10 | 9.73 | -10.52 | 20.11 | 154.98 |
| 217.10 | 9.73 | -10.52 | 20.11 | 154.98 |
| 217.10 | 9.73 | -10.52 | 20.11 | 154.98 |
| 217.10 | 9.74 | -10.52 | 20.11 | 154.98 |
| 217.10 | 9.73 | -10.52 | 20.11 | 154.98 |
| 217.10 | 9.73 | -10.52 | 20.10 | 154.98 |
| 217.10 | 9.73 | -10.52 | 20.11 | 154.98 |
| 217.10 | 9.73 | -10.52 | 20.11 | 154.98 |

|        |      |        |       |        |
|--------|------|--------|-------|--------|
| 217.10 | 9.73 | -10.52 | 20.11 | 154.98 |
| 217.10 | 9.73 | -10.52 | 20.11 | 154.98 |
| 217.10 | 9.73 | -10.52 | 20.11 | 154.98 |
| 217.10 | 9.73 | -10.52 | 20.11 | 154.98 |
| 217.10 | 9.73 | -10.52 | 20.11 | 154.98 |
| 217.10 | 9.73 | -10.52 | 20.11 | 154.98 |
| 217.10 | 9.73 | -10.52 | 20.11 | 154.98 |
| 217.10 | 9.73 | -10.52 | 20.11 | 154.98 |
| 217.10 | 9.73 | -10.52 | 20.11 | 154.98 |
| 217.10 | 9.73 | -10.52 | 20.11 | 154.98 |
| 217.10 | 9.73 | -10.52 | 20.11 | 154.98 |
| 217.10 | 9.73 | -10.52 | 20.11 | 154.98 |
| 217.10 | 9.73 | -10.52 | 20.11 | 154.98 |
| 217.10 | 9.73 | -10.52 | 20.11 | 154.98 |
| 217.10 | 9.73 | -10.52 | 20.11 | 154.98 |
| 217.10 | 9.73 | -10.52 | 20.11 | 154.98 |
| 217.10 | 9.73 | -10.52 | 20.11 | 154.98 |
| 217.10 | 9.73 | -10.52 | 20.11 | 154.98 |
| 217.10 | 9.73 | -10.52 | 20.11 | 154.98 |
| 217.10 | 9.73 | -10.52 | 20.11 | 154.98 |
| 217.10 | 9.73 | -10.52 | 20.11 | 154.98 |
| 217.10 | 9.73 | -10.52 | 20.11 | 154.98 |
| 217.10 | 9.73 | -10.52 | 20.11 | 154.98 |
| 217.10 | 9.73 | -10.52 | 20.11 | 154.98 |
| 217.10 | 9.73 | -10.52 | 20.11 | 154.98 |
| 217.10 | 9.73 | -10.52 | 20.11 | 154.98 |
| 217.10 | 9.73 | -10.52 | 20.11 | 154.98 |
| 217.10 | 9.73 | -10.52 | 20.11 | 154.98 |
| 217.10 | 9.74 | -10.52 | 20.11 | 154.98 |
| 217.10 | 9.73 | -10.52 | 20.11 | 154.98 |
| 217.10 | 9.73 | -10.52 | 20.11 | 154.98 |





























|        |      |        |       |        |
|--------|------|--------|-------|--------|
| 217.10 | 9.73 | -10.52 | 20.11 | 154.98 |
| 217.10 | 9.73 | -10.52 | 20.11 | 154.98 |
| 217.10 | 9.73 | -10.52 | 20.11 | 154.98 |
| 217.10 | 9.73 | -10.52 | 20.11 | 154.98 |
| 217.10 | 9.73 | -10.52 | 20.11 | 154.98 |
| 217.10 | 9.73 | -10.52 | 20.11 | 154.98 |
| 217.10 | 9.73 | -10.52 | 20.11 | 154.98 |
| 217.10 | 9.73 | -10.52 | 20.11 | 154.98 |
| 217.10 | 9.73 | -10.52 | 20.11 | 154.98 |
| 217.10 | 9.73 | -10.52 | 20.11 | 154.98 |
| 217.10 | 9.73 | -10.52 | 20.11 | 154.98 |
| 217.10 | 9.73 | -10.52 | 20.11 | 154.98 |
| 217.10 | 9.73 | -10.52 | 20.10 | 154.98 |
| 217.10 | 9.73 | -10.52 | 20.11 | 154.98 |
| 217.10 | 9.73 | -10.52 | 20.11 | 154.98 |
| 217.10 | 9.73 | -10.52 | 20.11 | 154.98 |
| 217.10 | 9.73 | -10.52 | 20.11 | 154.98 |
| 217.10 | 9.73 | -10.52 | 20.11 | 154.98 |
| 217.10 | 9.73 | -10.52 | 20.11 | 154.98 |
| 217.10 | 9.73 | -10.52 | 20.11 | 154.98 |
| 217.10 | 9.73 | -10.52 | 20.11 | 154.98 |
| 217.10 | 9.73 | -10.52 | 20.11 | 154.98 |
| 217.10 | 9.73 | -10.52 | 20.11 | 154.98 |
| 217.10 | 9.73 | -10.52 | 20.10 | 154.98 |
| 217.10 | 9.73 | -10.52 | 20.11 | 154.98 |
| 217.10 | 9.73 | -10.52 | 20.11 | 154.98 |
| 217.10 | 9.73 | -10.52 | 20.11 | 154.98 |
| 217.10 | 9.73 | -10.52 | 20.11 | 154.98 |
| 217.10 | 9.73 | -10.52 | 20.11 | 154.98 |
| 217.10 | 9.73 | -10.52 | 20.11 | 154.98 |
| 217.10 | 9.73 | -10.52 | 20.11 | 154.98 |
| 217.10 | 9.73 | -10.52 | 20.10 | 154.98 |
| 217.10 | 9.73 | -10.52 | 20.10 | 154.98 |
| 217.10 | 9.73 | -10.52 | 20.11 | 154.98 |
| 217.10 | 9.73 | -10.52 | 20.11 | 154.98 |
| 217.10 | 9.73 | -10.52 | 20.11 | 154.98 |





































|        |      |        |       |        |
|--------|------|--------|-------|--------|
| 217.10 | 9.73 | -10.52 | 20.11 | 154.98 |
| 217.10 | 9.73 | -10.52 | 20.11 | 154.98 |
| 217.10 | 9.73 | -10.52 | 20.11 | 154.98 |
| 217.10 | 9.73 | -10.52 | 20.11 | 154.98 |
| 217.10 | 9.73 | -10.52 | 20.11 | 154.98 |
| 217.10 | 9.74 | -10.52 | 20.11 | 154.98 |
| 217.10 | 9.73 | -10.52 | 20.11 | 154.98 |
| 217.10 | 9.73 | -10.52 | 20.11 | 154.98 |
| 217.10 | 9.73 | -10.52 | 20.11 | 154.98 |
| 217.10 | 9.73 | -10.52 | 20.11 | 154.98 |
| 217.10 | 9.74 | -10.52 | 20.11 | 154.98 |
| 217.10 | 9.74 | -10.52 | 20.11 | 154.98 |
| 217.10 | 9.74 | -10.52 | 20.11 | 154.98 |
| 217.10 | 9.73 | -10.52 | 20.11 | 154.98 |
| 217.10 | 9.73 | -10.52 | 20.11 | 154.98 |
| 217.10 | 9.73 | -10.52 | 20.10 | 154.98 |
| 217.10 | 9.73 | -10.52 | 20.11 | 154.98 |
| 217.10 | 9.73 | -10.52 | 20.11 | 154.98 |
| 217.10 | 9.73 | -10.52 | 20.11 | 154.98 |
| 217.10 | 9.73 | -10.52 | 20.11 | 154.98 |
| 217.10 | 9.73 | -10.52 | 20.11 | 154.98 |
| 217.10 | 9.73 | -10.52 | 20.11 | 154.98 |
| 217.10 | 9.73 | -10.52 | 20.11 | 154.98 |
| 217.10 | 9.73 | -10.52 | 20.11 | 154.98 |
| 217.10 | 9.73 | -10.52 | 20.11 | 154.98 |
| 217.10 | 9.73 | -10.52 | 20.11 | 154.98 |
| 217.10 | 9.73 | -10.52 | 20.11 | 154.98 |
| 217.10 | 9.73 | -10.52 | 20.11 | 154.98 |
| 217.10 | 9.74 | -10.52 | 20.11 | 154.98 |
| 217.10 | 9.73 | -10.52 | 20.11 | 154.98 |
| 217.10 | 9.73 | -10.52 | 20.11 | 154.98 |
| 217.10 | 9.73 | -10.52 | 20.11 | 154.98 |
| 217.10 | 9.73 | -10.52 | 20.11 | 154.98 |
| 217.10 | 9.73 | -10.52 | 20.11 | 154.98 |
| 217.10 | 9.73 | -10.52 | 20.11 | 154.98 |
| 217.10 | 9.73 | -10.52 | 20.11 | 154.98 |
| 217.10 | 9.73 | -10.52 | 20.10 | 154.98 |
| 217.10 | 9.73 | -10.52 | 20.11 | 154.98 |
| 217.10 | 9.73 | -10.52 | 20.11 | 154.98 |
| 217.10 | 9.73 | -10.52 | 20.11 | 154.98 |

|        |      |        |       |        |
|--------|------|--------|-------|--------|
| 217.10 | 9.73 | -10.52 | 20.11 | 154.98 |
| 217.10 | 9.74 | -10.52 | 20.11 | 154.98 |
| 217.10 | 9.73 | -10.52 | 20.11 | 154.98 |
| 217.10 | 9.73 | -10.52 | 20.11 | 154.98 |
| 217.10 | 9.73 | -10.52 | 20.11 | 154.98 |
| 217.10 | 9.73 | -10.52 | 20.11 | 154.98 |
| 217.10 | 9.73 | -10.52 | 20.11 | 154.98 |
| 217.10 | 9.73 | -10.52 | 20.11 | 154.98 |
| 217.10 | 9.73 | -10.52 | 20.11 | 154.98 |
| 217.10 | 9.73 | -10.52 | 20.11 | 154.98 |
| 217.10 | 9.74 | -10.52 | 20.11 | 154.98 |
| 217.10 | 9.73 | -10.52 | 20.11 | 154.98 |
| 217.10 | 9.73 | -10.52 | 20.11 | 154.98 |
| 217.10 | 9.73 | -10.52 | 20.11 | 154.98 |
| 217.10 | 9.73 | -10.52 | 20.11 | 154.98 |
| 217.10 | 9.73 | -10.52 | 20.10 | 154.98 |
| 217.10 | 9.73 | -10.52 | 20.11 | 154.98 |
| 217.10 | 9.73 | -10.52 | 20.11 | 154.98 |
| 217.10 | 9.73 | -10.52 | 20.11 | 154.98 |
| 217.10 | 9.74 | -10.52 | 20.11 | 154.98 |
| 217.10 | 9.73 | -10.52 | 20.11 | 154.98 |
| 217.10 | 9.73 | -10.52 | 20.11 | 154.98 |
| 217.10 | 9.73 | -10.52 | 20.10 | 154.98 |
| 217.10 | 9.73 | -10.52 | 20.10 | 154.98 |
| 217.10 | 9.73 | -10.52 | 20.11 | 154.98 |
| 217.10 | 9.73 | -10.52 | 20.11 | 154.98 |
| 217.10 | 9.73 | -10.52 | 20.11 | 154.98 |
| 217.10 | 9.73 | -10.52 | 20.11 | 154.98 |
| 217.10 | 9.73 | -10.52 | 20.11 | 154.98 |
| 217.10 | 9.73 | -10.52 | 20.11 | 154.98 |
| 217.10 | 9.73 | -10.52 | 20.11 | 154.98 |
| 217.10 | 9.73 | -10.52 | 20.11 | 154.98 |
| 217.10 | 9.73 | -10.52 | 20.10 | 154.98 |
| 217.10 | 9.73 | -10.52 | 20.11 | 154.98 |
| 217.10 | 9.73 | -10.52 | 20.11 | 154.98 |



|        |      |        |       |        |
|--------|------|--------|-------|--------|
| 217.10 | 9.73 | -10.52 | 20.11 | 154.98 |
| 217.10 | 9.73 | -10.52 | 20.11 | 154.98 |
| 217.10 | 9.73 | -10.52 | 20.11 | 154.98 |
| 217.10 | 9.73 | -10.52 | 20.11 | 154.98 |
| 217.10 | 9.73 | -10.52 | 20.11 | 154.98 |
| 217.10 | 9.73 | -10.52 | 20.11 | 154.98 |
| 217.10 | 9.73 | -10.52 | 20.10 | 154.98 |
| 217.10 | 9.73 | -10.52 | 20.11 | 154.98 |
| 217.10 | 9.74 | -10.52 | 20.11 | 154.98 |
| 217.10 | 9.73 | -10.52 | 20.10 | 154.98 |
| 217.10 | 9.73 | -10.52 | 20.11 | 154.98 |
| 217.10 | 9.73 | -10.52 | 20.11 | 154.98 |
| 217.10 | 9.73 | -10.52 | 20.11 | 154.98 |
| 217.10 | 9.73 | -10.52 | 20.10 | 154.98 |
| 217.10 | 9.73 | -10.52 | 20.11 | 154.98 |
| 217.10 | 9.73 | -10.52 | 20.11 | 154.98 |
| 217.10 | 9.73 | -10.52 | 20.11 | 154.98 |
| 217.10 | 9.73 | -10.52 | 20.11 | 154.98 |
| 217.10 | 9.73 | -10.52 | 20.11 | 154.98 |
| 217.10 | 9.73 | -10.52 | 20.11 | 154.98 |
| 217.10 | 9.73 | -10.52 | 20.11 | 154.98 |
| 217.10 | 9.73 | -10.52 | 20.11 | 154.98 |
| 217.10 | 9.73 | -10.52 | 20.11 | 154.98 |
| 217.10 | 9.73 | -10.52 | 20.10 | 154.98 |
| 217.10 | 9.74 | -10.52 | 20.11 | 154.98 |
| 217.10 | 9.73 | -10.52 | 20.11 | 154.98 |
| 217.10 | 9.73 | -10.52 | 20.11 | 154.98 |
| 217.10 | 9.73 | -10.52 | 20.11 | 154.98 |
| 217.10 | 9.73 | -10.52 | 20.11 | 154.98 |
| 217.10 | 9.73 | -10.52 | 20.11 | 154.98 |
| 217.10 | 9.73 | -10.52 | 20.11 | 154.98 |
| 217.10 | 9.73 | -10.52 | 20.11 | 154.98 |
| 217.10 | 9.73 | -10.52 | 20.11 | 154.98 |
| 217.10 | 9.73 | -10.52 | 20.11 | 154.98 |
| 217.10 | 9.73 | -10.52 | 20.10 | 154.98 |
| 217.10 | 9.73 | -10.52 | 20.10 | 154.98 |
| 217.10 | 9.73 | -10.52 | 20.11 | 154.98 |





























































































































































































































































































$\delta^{B/A}$  (permil)

0.02  
-0.02  
0.00  
0.01  
0.00  
-0.01  
0.00  
0.01  
-0.01  
-0.02  
0.02  
-0.02  
0.00  
-0.01  
0.01  
0.01  
0.01  
0.01  
-0.01  
0.00  
0.00  
0.01  
-0.01  
0.00  
0.00  
0.00  
-0.01  
-0.03  
0.02  
0.01  
-0.03

0.00  
0.00  
-0.03  
0.01  
-0.01  
0.00  
0.01  
0.00  
0.00  
0.01  
0.01  
0.00  
0.00  
-0.01  
0.01  
0.02  
-0.01  
-0.02  
-0.01  
0.00  
-0.02  
0.02  
0.01  
0.00  
0.02  
-0.01  
0.03  
0.00  
-0.01  
0.00  
0.00  
-0.02  
0.00  
-0.01  
0.00  
-0.01  
0.02  
0.01  
0.01  
0.01  
0.01

0.00  
0.00  
0.00  
0.03  
0.01  
-0.03  
-0.04  
0.01  
-0.01  
0.00  
0.01  
-0.02  
0.00  
0.01  
0.00  
-0.01  
0.01  
-0.01  
0.03  
0.02  
-0.02  
0.01  
-0.02  
0.00  
-0.01  
-0.01  
-0.01  
-0.02  
0.00  
-0.01  
-0.01  
0.02  
-0.01  
0.02  
0.02  
0.02  
0.00  
-0.01  
0.01  
0.01  
0.00



0.02  
-0.01  
0.01  
0.02  
-0.01  
0.01  
0.02  
-0.02  
0.00  
-0.03  
0.02  
0.00  
0.02  
-0.02  
-0.01  
0.00  
-0.03  
-0.02  
0.00  
0.01  
0.00  
0.00  
0.02  
0.01  
0.01  
-0.02  
0.00  
0.01  
-0.01  
-0.01  
0.01  
0.01  
0.01  
-0.01  
0.02  
0.00  
0.01  
-0.03  
-0.01  
0.02  
0.00

0.00  
0.01  
0.01  
0.01  
0.00  
-0.01  
-0.01  
0.00  
0.01  
0.01  
-0.03  
0.02  
0.03  
-0.01  
-0.01  
0.01  
0.01  
-0.01  
0.01  
0.02  
0.00  
0.01  
-0.03  
-0.02  
0.01  
-0.01  
-0.02  
-0.01  
0.01  
0.02  
0.01  
0.00  
0.00  
-0.01  
0.00  
-0.03  
0.01  
-0.01  
-0.02  
0.01  
0.00

0.01  
-0.02  
0.02  
-0.01  
0.01  
0.00  
-0.01  
0.00  
0.01  
0.01  
-0.01  
0.02  
0.00  
-0.03  
0.03  
-0.01  
0.00  
0.02  
0.00  
0.00  
0.02  
0.01  
0.00  
-0.01  
0.01  
-0.02  
0.00  
0.00  
0.00  
-0.02  
0.04  
0.00  
0.01  
0.02  
0.01  
0.00  
0.00  
0.00  
0.00  
0.01  
0.00

0.00  
-0.01  
0.00  
0.02  
0.00  
-0.01  
0.00  
-0.02  
-0.01  
-0.02  
0.00  
0.00  
-0.01  
-0.01  
0.00  
0.01  
-0.02  
0.01  
0.03  
0.00  
0.00  
0.00  
-0.02  
-0.02  
0.00  
0.02  
0.01  
-0.03  
0.00  
-0.02  
0.00  
0.00  
0.02  
0.02  
0.01  
-0.01  
0.01  
0.01  
0.01  
0.01  
0.00

0.01  
-0.01  
-0.01  
0.02  
-0.01  
0.00  
0.01  
0.01  
-0.01  
0.01  
0.03  
0.01  
0.00  
-0.02  
0.00  
0.01  
0.00  
0.00  
0.01  
0.00  
0.00  
0.00  
-0.01  
0.00  
0.01  
0.00  
0.01  
0.02  
-0.01  
0.01  
-0.01  
0.00  
-0.01  
0.00  
-0.01  
0.00  
0.00  
0.01  
0.01  
0.00  
0.02

-0.02  
0.01  
0.00  
-0.01  
0.01  
0.00  
0.02  
0.00  
-0.02  
0.02  
0.00  
0.01  
-0.03  
0.01  
-0.01  
0.01  
0.02  
-0.03  
-0.01  
-0.01  
0.02  
-0.01  
0.03  
-0.01  
0.00  
0.01  
0.01  
0.00  
0.00  
0.04  
-0.01  
0.00  
0.01  
0.02  
-0.02  
-0.03  
-0.01  
-0.02  
0.00  
-0.02  
-0.01

-0.02  
0.00  
0.01  
0.03  
0.02  
0.01  
0.00  
-0.01  
-0.02  
0.01  
0.01  
0.01  
0.01  
-0.02  
-0.04  
-0.01  
0.00  
-0.01  
-0.01  
0.00  
-0.01  
-0.03  
0.00  
0.03  
0.03  
-0.01  
0.01  
-0.01  
-0.01  
0.01  
0.01  
0.02  
0.00  
-0.01  
-0.01  
0.00  
0.00  
0.02  
0.00  
0.00  
0.01

0.01  
-0.03  
-0.01  
0.01  
0.00  
0.01  
0.00  
0.01  
0.00  
0.00  
-0.01  
-0.01  
0.00  
-0.01  
0.00  
0.00  
-0.01  
0.00  
-0.01  
-0.01  
0.00  
-0.02  
-0.02  
-0.01  
0.01  
0.00  
0.01  
0.02  
0.01  
0.02  
-0.02  
-0.01  
0.00  
-0.02  
-0.04  
-0.01  
0.01  
-0.01  
0.01  
-0.01  
-0.01



-0.01  
-0.01  
0.01  
0.00  
0.00  
-0.02  
-0.01  
0.00  
0.01  
0.00  
0.01  
-0.02  
0.00  
-0.01  
-0.01  
0.01  
0.02  
-0.01  
-0.01  
0.02  
-0.01  
0.01  
0.00  
0.01  
0.00  
0.00  
0.03  
0.02  
0.00  
0.03  
0.00  
-0.01  
-0.01  
-0.01  
0.03  
0.00  
0.00  
-0.02  
0.02  
-0.01  
0.00

-0.01  
-0.03  
0.00  
0.01  
0.00  
0.00  
-0.01  
0.01  
0.01  
0.01  
-0.02  
-0.01  
0.02  
0.00  
0.01  
0.01  
0.01  
-0.01  
0.01  
0.01  
0.01  
0.02  
0.01  
-0.01  
0.02  
0.02  
-0.01  
0.00  
-0.01  
0.00  
0.00  
0.00  
0.00  
0.01  
0.02  
-0.01  
0.02  
0.01  
0.00  
-0.02  
0.01

0.01  
0.02  
0.01  
-0.01  
-0.01  
-0.01  
-0.02  
-0.02  
0.02  
-0.01  
0.02  
0.01  
0.02  
0.00  
0.00  
0.00  
0.00  
-0.01  
-0.01  
0.02  
-0.02  
-0.03  
0.01  
0.01  
-0.01  
0.00  
0.00  
-0.01  
0.00  
0.01  
-0.02  
0.02  
0.00  
0.01  
-0.01  
0.02  
0.01  
0.00  
-0.01  
0.01  
0.01

0.01  
-0.02  
0.01  
0.01  
0.00  
0.01  
-0.02  
-0.02  
0.01  
0.01  
0.02  
0.00  
-0.01  
-0.01  
0.00  
-0.04  
-0.02  
0.01  
0.00  
0.00  
0.02  
-0.02  
-0.01  
-0.02  
-0.02  
0.00  
0.00  
0.03  
-0.01  
0.02  
0.01  
-0.03  
0.00  
-0.01  
-0.04  
0.03  
0.00  
0.00  
-0.02  
-0.02  
-0.01

0.00  
0.01  
-0.01  
0.00  
-0.01  
0.01  
-0.01  
0.01  
0.00  
-0.01  
0.00  
-0.01  
-0.01  
-0.01  
0.02  
-0.01  
-0.01  
0.01  
-0.01  
-0.01  
0.01  
0.03  
-0.02  
-0.01  
0.00  
0.02  
-0.02  
0.00  
0.03  
-0.01  
0.00  
0.03  
0.00  
0.00  
0.00  
0.02  
0.01  
0.01  
0.00  
0.01  
0.01

0.01  
0.01  
-0.03  
-0.01  
-0.01  
0.01  
-0.01  
0.01  
0.02  
0.01  
0.02  
0.01  
0.01  
-0.01  
-0.01  
0.00  
-0.01  
-0.02  
0.00  
0.00  
-0.02  
-0.02  
0.00  
0.01  
0.01  
-0.01  
-0.02  
0.02  
0.00  
-0.02  
0.00  
0.01  
0.00  
0.03  
0.03  
0.00  
-0.01  
-0.01  
0.01  
0.00  
0.00

0.00  
-0.01  
0.01  
-0.02  
0.00  
0.00  
-0.02  
0.01  
0.00  
-0.01  
0.00  
-0.01  
-0.01  
-0.03  
0.01  
0.00  
-0.01  
0.02  
0.00  
0.03  
0.00  
0.00  
-0.01  
-0.01  
0.00  
-0.03  
0.00  
0.03  
0.04  
0.00  
0.01  
0.00  
-0.02  
-0.02  
0.00  
0.02  
0.01  
0.00  
0.00  
0.02  
0.01

0.01  
0.01  
0.00  
0.01  
0.00  
0.00  
0.00  
0.01  
0.00  
0.02  
0.00  
-0.02  
0.00  
0.00  
-0.02  
0.01  
0.01  
-0.01  
0.02  
-0.01  
0.01  
0.01  
0.01  
-0.02  
0.02  
-0.01  
0.00  
-0.01  
-0.01  
0.00  
-0.03  
-0.02  
0.02  
-0.01  
0.02  
-0.01  
0.00  
0.03  
-0.01  
0.01  
0.00



0.00  
-0.02  
0.01  
0.01  
0.02  
0.01  
0.01  
0.01  
-0.02  
-0.01  
0.00  
-0.01  
-0.03  
0.00  
0.00  
-0.02  
0.01  
0.01  
0.00  
-0.03  
-0.01  
0.00  
0.01  
0.01  
-0.01  
0.01  
0.01  
0.01  
0.02  
0.01  
0.00  
-0.02  
-0.01  
-0.01  
-0.01  
0.00  
-0.01  
0.00  
-0.01  
0.00  
0.00

0.01  
0.00  
0.01  
-0.01  
-0.01  
0.00  
0.00  
0.00  
0.02  
-0.01  
0.01  
0.01  
0.01  
0.01  
-0.01  
0.02  
0.02  
0.03  
0.02  
-0.03  
0.00  
0.00  
-0.01  
-0.01  
0.01  
0.00  
-0.01  
-0.02  
0.00  
0.00  
-0.03  
0.02  
0.00  
-0.01  
0.02  
0.01  
0.00  
0.01  
0.00  
0.02  
0.02

-0.02  
0.01  
0.01  
0.01  
0.04  
0.02  
-0.01  
-0.01  
0.01  
0.01  
0.02  
-0.01  
-0.01  
0.01  
-0.01  
-0.01  
-0.01  
0.02  
-0.01  
-0.01  
-0.02  
0.00  
0.01  
0.03  
0.00  
0.02  
0.02  
0.00  
-0.02  
0.00  
-0.01  
0.02  
0.01  
-0.02  
-0.01  
-0.01  
0.00  
0.01  
0.02  
0.02  
0.02

0.00  
0.01  
0.01  
-0.02  
0.00  
-0.01  
0.00  
0.01  
0.00  
0.00  
-0.01  
0.02  
0.02  
0.00  
0.02  
-0.01  
-0.01  
0.03  
0.00  
-0.01  
-0.01  
-0.03  
0.01  
-0.01  
-0.01  
0.00  
0.01  
-0.03  
-0.01  
0.02  
0.00  
0.00  
0.02  
-0.01  
0.02  
0.02  
0.03  
-0.02  
0.00  
0.02  
-0.01

-0.03  
0.02  
0.01  
-0.01  
-0.02  
-0.01  
0.01  
0.00  
-0.01  
0.01  
0.00  
0.00  
0.00  
0.01  
-0.01  
0.03  
-0.02  
0.04  
0.00  
0.00  
0.00  
0.00  
0.00  
-0.01  
0.01  
0.00  
0.00  
-0.02  
-0.01  
0.00  
0.00  
-0.01  
0.00  
-0.02  
0.00  
-0.01  
0.01  
0.01  
-0.02  
0.01  
-0.01

0.01  
0.00  
-0.01  
0.01  
0.01  
0.00  
-0.01  
0.00  
0.01  
0.02  
-0.01  
0.01  
0.04  
0.00  
0.00  
0.01  
0.00  
0.01  
0.01  
0.00  
0.03  
-0.01  
0.00  
-0.04  
-0.01  
-0.01  
-0.01  
0.00  
0.00  
-0.02  
0.00  
-0.01  
0.00  
0.00  
0.01  
0.01  
0.01  
-0.01  
0.01  
-0.02  
-0.01

0.03  
0.01  
0.00  
0.03  
0.01  
0.01  
-0.01  
-0.03  
0.00  
-0.01  
-0.03  
-0.03  
-0.03  
0.00  
0.02  
0.00  
-0.05  
0.00  
-0.01  
0.02  
-0.01  
0.00  
0.01  
0.00  
-0.01  
0.01  
-0.01  
0.00  
0.01  
0.00  
-0.01  
0.01  
0.00  
0.00  
0.01  
0.00  
-0.02  
-0.01  
0.02  
0.00  
-0.01

0.00  
0.01  
0.02  
-0.01  
-0.01  
0.00  
0.01  
0.00  
-0.01  
0.00  
0.00  
0.01  
0.01  
0.01  
0.00  
0.01  
0.01  
-0.01  
0.00  
-0.02  
-0.01  
0.00  
-0.01  
0.00  
0.00  
0.02  
0.02  
-0.01  
-0.02  
-0.01  
0.03  
-0.01  
-0.02  
-0.01  
0.01  
0.00  
-0.02  
0.01  
0.01  
0.00  
-0.01



0.01  
0.01  
-0.02  
-0.02  
0.02  
0.00  
0.00  
0.00  
0.03  
-0.02  
-0.01  
0.01  
-0.02  
-0.01  
0.03  
0.01  
-0.01  
0.01  
-0.02  
-0.01  
-0.02  
-0.01  
-0.01  
-0.01  
-0.03  
0.03  
0.00  
0.00  
-0.01  
0.00  
0.03  
0.00  
0.00  
0.00  
0.00  
0.02  
0.01  
-0.02  
0.03  
-0.02  
0.02  
0.02

-0.01  
0.00  
0.00  
-0.03  
-0.01  
0.01  
0.01  
-0.02  
0.02  
0.01  
0.02  
0.00  
-0.01  
0.02  
0.02  
-0.02  
0.00  
0.00  
0.02  
-0.02  
0.02  
0.01  
-0.01  
0.01  
0.01  
0.00  
0.02  
0.01  
0.00  
0.01  
-0.02  
0.00  
-0.01  
0.01  
0.02  
-0.01  
0.03  
0.01  
0.02  
0.01  
0.00

0.00  
0.01  
-0.02  
-0.01  
-0.02  
-0.02  
0.00  
0.00  
0.01  
0.01  
-0.01  
-0.01  
0.02  
0.00  
0.01  
0.00  
-0.01  
-0.02  
0.01  
0.00  
-0.01  
0.01  
0.01  
-0.02  
0.02  
0.01  
-0.01  
0.02  
-0.01  
-0.01  
0.00  
-0.01  
0.01  
-0.01  
0.01  
0.03  
0.00  
-0.02  
-0.01  
0.01  
0.00

-0.01  
-0.01  
0.00  
-0.02  
0.01  
0.01  
-0.01  
-0.01  
0.00  
0.01  
0.02  
-0.02  
0.00  
-0.03  
0.02  
0.01  
0.00  
0.01  
-0.01  
0.00  
0.01  
0.01  
0.02  
0.01  
0.00  
0.01  
0.01  
-0.01  
-0.01  
0.01  
0.02  
0.00  
0.01  
-0.01  
0.02  
0.01  
0.00  
0.00  
-0.03  
-0.01  
0.00

0.00  
0.00  
-0.02  
0.00  
0.00  
0.00  
0.00  
-0.03  
0.02  
0.00  
-0.02  
0.00  
0.00  
-0.01  
-0.01  
-0.02  
0.02  
0.02  
-0.01  
-0.03  
-0.02  
0.00  
0.02  
0.02  
0.00  
0.02  
0.00  
-0.01  
0.02  
0.00  
-0.01  
0.02  
0.02  
0.01  
-0.01  
0.00  
-0.01  
0.03  
-0.02  
0.01  
0.01

0.00  
0.00  
0.01  
0.00  
0.01  
0.01  
-0.01  
-0.01  
0.02  
0.00  
-0.02  
0.00  
0.01  
0.00  
0.00  
0.00  
0.00  
0.00  
0.00  
0.01  
-0.01  
-0.02  
0.01  
0.00  
0.00  
-0.01  
0.00  
0.00  
0.01  
0.01  
0.00  
0.02  
-0.01  
0.02  
0.01  
0.03  
0.00  
0.02  
0.00  
0.00  
0.03

0.02  
0.02  
-0.02  
0.03  
-0.01  
0.00  
0.00  
0.02  
0.01  
-0.01  
0.01  
0.00  
-0.02  
0.01  
0.00  
0.02  
0.01  
0.00  
-0.01  
0.01  
0.02  
0.00  
0.01  
0.00  
0.03  
0.01  
0.01  
0.01  
-0.02  
0.01  
-0.02  
0.01  
0.00  
0.00  
-0.01  
-0.02  
0.01  
0.00  
0.00  
0.00  
-0.03

-0.02  
-0.01  
0.01  
-0.01  
0.01  
0.00  
0.02  
-0.01  
-0.02  
-0.02  
0.00  
-0.01  
0.02  
0.02  
-0.01  
0.00  
-0.01  
0.00  
-0.03  
-0.01  
0.01  
0.01  
-0.01  
0.00  
-0.02  
-0.01  
0.00  
-0.01  
0.00  
0.00  
0.01  
-0.01  
0.01  
0.03  
0.01  
0.00  
0.02  
-0.01  
0.00  
0.00  
0.01



0.00  
0.01  
0.01  
-0.02  
-0.02  
-0.02  
0.00  
0.00  
-0.01  
-0.03  
0.00  
-0.02  
0.00  
-0.02  
0.02  
-0.01  
0.01  
-0.01  
0.00  
0.00  
-0.02  
0.01  
-0.01  
-0.01  
-0.01  
0.01  
0.01  
-0.01  
0.01  
0.01  
-0.01  
-0.01  
-0.01  
0.00  
0.00  
0.02  
0.00  
0.01  
0.00  
-0.01  
0.01

0.01  
-0.02  
0.00  
0.01  
0.01  
0.01  
0.01  
0.00  
0.00  
-0.01  
0.01  
-0.01  
-0.02  
-0.02  
-0.01  
0.00  
-0.01  
0.01  
-0.03  
0.01  
-0.01  
0.01  
-0.01  
0.00  
0.01  
-0.01  
0.02  
0.02  
0.00  
-0.01  
0.00  
0.00  
0.00  
0.00  
0.02  
0.01  
-0.01  
0.00  
0.01  
-0.02  
0.01

0.00  
-0.04  
0.00  
0.00  
-0.02  
-0.01  
-0.01  
0.00  
0.01  
-0.01  
0.02  
0.02  
-0.01  
-0.01  
0.01  
0.00  
0.00  
-0.01  
0.01  
-0.03  
0.01  
0.01  
0.00  
0.00  
0.00  
0.02  
0.00  
0.01  
-0.01  
0.01  
-0.01  
0.02  
-0.01  
0.00  
0.01  
0.00  
0.02  
-0.01  
-0.02  
-0.01  
-0.01

0.02  
-0.01  
0.00  
0.01  
-0.01  
0.00  
0.00  
0.01  
0.00  
0.01  
0.02  
0.00  
0.00  
-0.03  
0.00  
0.01  
0.00  
-0.02  
-0.01  
0.02  
0.01  
0.01  
0.01  
0.03  
0.00  
0.01  
-0.01  
0.01  
0.01  
0.03  
-0.01  
0.00  
-0.01  
0.01  
-0.01  
0.01  
0.01  
0.00  
0.01  
-0.03  
-0.01

-0.01  
-0.01  
0.03  
-0.01  
0.00  
-0.01  
0.00  
0.00  
0.02  
0.02  
0.03  
0.00  
0.00  
0.00  
-0.02  
0.01  
0.00  
0.01  
0.00  
0.01  
-0.01  
-0.02  
0.00  
-0.01  
0.00  
-0.01  
-0.02  
0.02  
-0.02  
0.00  
-0.01  
-0.02  
0.00  
-0.01  
0.01  
-0.01  
-0.01  
0.00  
0.00  
0.00  
-0.02

0.00  
0.01  
0.01  
-0.01  
-0.01  
-0.01  
-0.02  
0.01  
0.01  
0.01  
0.01  
0.00  
-0.01  
-0.01  
0.03  
0.00  
0.00  
0.01  
-0.02  
-0.01  
0.01  
0.00  
-0.01  
-0.01  
0.02  
-0.01  
-0.01  
-0.02  
-0.02  
0.00  
0.00  
0.00  
0.02  
0.00  
0.00  
-0.01  
0.01  
-0.03  
0.02  
0.00  
-0.02

0.01  
0.02  
-0.01  
0.00  
0.01  
0.00  
0.02  
-0.01  
-0.02  
0.00  
-0.01  
0.00  
0.02  
0.01  
0.01  
-0.02  
0.00  
0.00  
-0.01  
0.00  
0.00  
0.01  
0.01  
0.01  
0.01  
0.00  
0.02  
0.00  
0.02  
0.01  
0.00  
0.01  
-0.01  
0.01  
-0.01  
0.01  
0.00  
0.01  
0.00  
0.00  
0.01

0.01  
0.01  
0.02  
0.00  
0.00  
-0.01  
0.00  
0.01  
0.01  
0.01  
-0.01  
-0.01  
0.00  
0.02  
0.00  
0.00  
-0.01  
-0.01  
0.02  
-0.02  
-0.02  
-0.01  
-0.01  
0.01  
-0.02  
0.00  
-0.01  
0.00  
0.01  
-0.02  
0.01  
-0.01  
0.00  
0.02  
0.02  
0.02  
0.02  
0.01  
-0.01  
-0.01  
0.03



-0.03  
-0.03  
0.00  
0.01  
0.03  
-0.01  
0.02  
0.02  
0.00  
0.00  
0.00  
0.00  
0.02  
-0.01  
0.04  
0.00  
0.00  
0.01  
-0.01  
0.01  
0.02  
-0.02  
0.03  
0.01  
0.00  
0.02  
0.00  
-0.01  
-0.01  
0.03  
0.01  
0.02  
0.00  
-0.01  
-0.02  
-0.01  
-0.01  
-0.01  
0.00  
0.00  
-0.01

-0.02  
0.01  
0.02  
0.00  
0.02  
-0.02  
0.01  
0.01  
0.00  
0.02  
0.00  
0.01  
0.01  
0.03  
0.01  
0.00  
0.01  
-0.01  
0.00  
-0.01  
-0.01  
0.00  
0.02  
0.02  
0.01  
0.00  
0.00  
0.00  
0.02  
0.00  
-0.02  
0.03  
-0.01  
0.00  
0.01  
-0.01  
0.01  
0.02  
0.00  
0.00  
-0.01

-0.01  
0.01  
0.00  
0.01  
0.00  
0.00  
0.01  
0.00  
-0.02  
-0.01  
0.00  
0.01  
0.01  
-0.01  
0.00  
-0.01  
-0.02  
-0.01  
0.00  
-0.02  
0.00  
0.01  
0.01  
0.00  
0.01  
-0.01  
0.00  
-0.03  
0.00  
0.00  
-0.01  
-0.03  
0.01  
0.00  
-0.01  
0.01  
-0.02  
0.00  
-0.01  
-0.01  
-0.01

0.02  
0.01  
0.02  
0.03  
0.00  
0.01  
0.01  
0.00  
0.02  
0.00  
0.00  
0.00  
-0.01  
0.00  
0.02  
0.02  
-0.01  
0.00  
0.00  
-0.02  
0.02  
-0.01  
0.01  
0.00  
0.00  
0.01  
-0.01  
-0.02  
0.00  
-0.02  
0.01  
0.00  
0.01  
0.00  
0.03  
0.00  
0.00  
0.01  
0.02  
0.01  
-0.04

0.01  
0.01  
0.00  
0.01  
0.00  
-0.03  
0.00  
0.00  
0.00  
-0.02  
-0.01  
0.00  
0.00  
0.00  
0.00  
-0.01  
-0.01  
-0.02  
-0.03  
0.01  
0.00  
-0.01  
0.03  
0.01  
0.00  
-0.01  
0.01  
-0.01  
0.00  
0.01  
-0.01  
0.02  
0.02  
0.00  
0.02  
0.01  
0.00  
0.03  
0.00  
0.00  
-0.01

-0.02  
0.00  
0.00  
0.00  
-0.01  
0.00  
0.02  
0.01  
0.00  
0.00  
0.00  
0.00  
0.00  
-0.02  
-0.01  
-0.01  
0.01  
-0.01  
0.01  
-0.03  
0.00  
0.01  
-0.01  
0.00  
0.02  
0.00  
-0.01  
-0.01  
0.01  
-0.01  
0.01  
-0.01  
-0.01  
-0.01  
0.00  
-0.02  
0.00  
0.02  
0.02  
0.01  
0.01

-0.01  
0.00  
0.01  
0.02  
-0.02  
0.02  
0.01  
0.01  
0.01  
-0.01  
0.03  
-0.01  
-0.01  
0.00  
-0.01  
-0.01  
0.00  
0.01  
0.00  
0.02  
-0.03  
-0.02  
0.00  
-0.03  
0.03  
0.00  
0.00  
0.00  
-0.01  
-0.01  
0.03  
-0.02  
0.02  
0.00  
0.03  
-0.01  
0.02  
0.01  
0.00  
0.02  
0.01

-0.01  
0.00  
-0.01  
-0.02  
0.01  
-0.02  
0.02  
0.00  
-0.01  
-0.02  
0.02  
-0.01  
0.01  
0.00  
0.01  
0.00  
0.01  
-0.01  
0.01  
-0.01  
0.01  
0.01  
0.01  
0.01  
-0.02  
0.01  
-0.01  
-0.01  
0.01  
0.00  
0.00  
-0.02  
0.00  
0.00  
0.03  
0.00  
0.01  
0.02  
0.00  
0.00  
0.00



0.02  
0.00  
0.00  
0.01  
-0.01  
0.01  
0.00  
0.01  
-0.01  
0.00  
0.00  
0.00  
0.00  
0.00  
0.01  
0.01  
0.02  
0.01  
-0.01  
-0.01  
-0.01  
0.01  
0.01  
-0.01  
-0.01  
-0.01  
0.00  
0.00  
0.00  
0.00  
0.00  
0.00  
-0.01  
0.00  
0.01  
0.00  
-0.01  
-0.02  
0.02  
0.03  
0.00

0.00  
-0.01  
0.00  
-0.01  
0.00  
0.00  
-0.02  
-0.01  
-0.02  
0.00  
0.02  
0.00  
0.03  
0.00  
0.02  
0.03  
-0.01  
0.00  
0.00  
0.02  
-0.01  
0.00  
0.01  
0.00  
0.02  
0.00  
-0.02  
0.00  
0.01  
0.02  
-0.01  
-0.01  
0.01  
-0.02  
-0.02  
0.01  
0.02  
-0.02  
0.01  
0.01  
0.02

-0.02  
0.00  
-0.01  
-0.03  
0.02  
0.00  
-0.03  
0.02  
0.00  
-0.01  
0.00  
-0.01  
0.00  
0.00  
0.00  
-0.02  
-0.01  
0.00  
0.01  
-0.02  
0.00  
0.01  
0.00  
0.01  
0.02  
0.00  
-0.01  
-0.01  
0.00  
0.01  
0.00  
-0.01  
0.01  
0.01  
-0.02  
-0.04  
-0.02  
-0.01  
0.00  
0.00  
0.00

0.01  
-0.01  
0.00  
-0.01  
-0.01  
-0.01  
-0.01  
0.00  
0.01  
-0.01  
-0.01  
0.00  
0.01  
-0.02  
-0.02  
-0.01  
-0.01  
0.01  
-0.01  
0.01  
-0.01  
-0.01  
0.03  
0.01  
-0.02  
-0.01  
0.00  
-0.01  
-0.03  
-0.01  
0.02  
-0.02  
0.00  
0.00  
0.00  
0.03  
0.01  
0.00  
-0.02  
-0.01  
-0.03

0.00  
0.00  
-0.01  
-0.02  
0.02  
-0.02  
-0.01  
0.02  
0.00  
0.02  
-0.01  
0.00  
-0.01  
0.00  
0.01  
-0.02  
0.01  
-0.02  
-0.02  
0.01  
0.01  
0.01  
-0.02  
0.00  
-0.05  
-0.01  
0.00  
0.00  
-0.01  
0.01  
-0.01  
-0.01  
-0.01  
0.02  
0.00  
-0.01  
0.01  
-0.02  
0.00  
-0.01  
0.00

0.00  
0.00  
0.00  
0.02  
-0.02  
0.02  
0.05  
0.02  
0.00  
0.00  
0.01  
0.01  
0.01  
0.02  
-0.01  
-0.03  
-0.02  
-0.01  
-0.02  
-0.01  
0.00  
0.01  
-0.02  
0.00  
0.00  
-0.02  
-0.01  
0.01  
0.00  
-0.01  
0.02  
-0.01  
-0.03  
0.00  
0.00  
-0.01  
0.01  
-0.02  
0.01  
-0.01  
-0.02

0.00  
0.01  
-0.01  
-0.01  
-0.01  
-0.02  
-0.01  
0.02  
0.03  
0.00  
-0.03  
0.01  
0.01  
0.02  
0.00  
0.02  
0.03  
-0.01  
0.00  
-0.01  
0.02  
0.01  
0.02  
0.02  
0.01  
0.02  
0.01  
0.02  
0.00  
0.01  
0.00  
0.01  
0.01  
0.00  
-0.01  
0.02  
0.01  
0.00  
0.01  
0.01  
0.00

-0.02  
0.00  
-0.02  
0.01  
-0.03  
0.01  
0.01  
0.02  
0.00  
-0.01  
0.01  
0.02  
0.00  
0.01  
0.00  
-0.01  
0.01  
0.01  
-0.01  
-0.01  
0.02  
0.01  
0.00  
0.00  
0.01  
-0.01  
0.00  
0.00  
0.00  
0.03  
0.02  
0.00  
-0.02  
0.01  
0.01  
-0.01  
-0.03  
0.01  
-0.02  
0.01  
0.01



-0.02  
0.02  
-0.01  
0.02  
0.00  
0.01  
0.03  
0.00  
-0.02  
0.03  
0.01  
-0.03  
0.00  
0.00  
0.00  
-0.01  
-0.03  
0.01  
0.00  
-0.01  
-0.01  
-0.03  
-0.01  
-0.01  
0.01  
0.00  
0.00  
0.01  
-0.02  
0.00  
-0.01  
0.03  
-0.01  
0.00  
-0.01  
0.00  
0.00  
-0.01  
-0.01  
0.02  
-0.03

0.01  
0.01  
0.00  
0.02  
0.01  
0.01  
0.02  
-0.01  
-0.03  
0.02  
0.02  
-0.01  
0.02  
0.02  
0.01  
-0.02  
0.00  
0.00  
0.00  
-0.01  
-0.02  
0.00  
0.02  
0.02  
-0.01  
-0.01  
-0.01  
0.00  
0.02  
-0.01  
-0.01  
0.01  
0.03  
0.00  
-0.01  
0.01  
0.01  
-0.02  
0.01  
0.02  
0.01

-0.01  
-0.01  
0.01  
0.00  
0.00  
0.00  
-0.01  
0.01  
-0.02  
-0.01  
0.01  
0.02  
-0.01  
0.00  
-0.01  
0.00  
-0.02  
0.02  
0.00  
0.01  
0.01  
0.02  
0.01  
0.01  
-0.01  
0.01  
-0.01  
0.01  
0.00  
0.03  
0.02  
0.01  
0.00  
-0.01  
0.01  
0.01  
0.02  
-0.01  
0.00  
-0.01  
-0.02

0.00  
0.00  
0.00  
-0.01  
-0.02  
-0.01  
-0.01  
0.02  
-0.03  
0.01  
0.02  
0.02  
0.01  
0.02  
0.02  
-0.02  
0.00  
0.01  
0.00  
0.01  
0.02  
0.01  
-0.02  
0.00  
-0.01  
-0.01  
0.01  
-0.02  
0.01  
0.01  
0.00  
0.03  
0.01  
0.01  
0.00  
0.00  
-0.01  
-0.01  
0.01  
0.00  
0.00

0.00  
0.00  
-0.02  
0.02  
-0.01  
0.01  
-0.01  
-0.01  
0.00  
0.01  
0.01  
-0.02  
-0.02  
0.01  
-0.02  
0.00  
-0.01  
0.01  
0.02  
0.00  
-0.02  
0.00  
0.02  
-0.02  
-0.02  
-0.02  
0.01  
0.00  
-0.01  
0.02  
0.00  
-0.02  
0.01  
0.02  
-0.02  
0.02  
0.01  
-0.02  
0.01  
0.00  
-0.01

-0.01  
0.01  
-0.02  
0.01  
0.02  
-0.01  
-0.02  
0.00  
-0.02  
0.00  
-0.01  
0.00  
0.02  
0.01  
-0.02  
-0.02  
0.01  
-0.02  
0.00  
-0.01  
0.01  
0.00  
0.00  
0.02  
0.01  
0.00  
-0.02  
0.00  
0.00  
0.01  
-0.02  
0.01  
0.02  
0.01  
0.00  
-0.02  
0.00  
0.00  
-0.02  
0.02  
0.00

0.00  
0.00  
0.00  
-0.01  
-0.01  
0.01  
0.00  
-0.01  
-0.01  
-0.01  
0.00  
-0.01  
0.00  
0.01  
-0.01  
-0.01  
-0.01  
0.01  
-0.01  
0.00  
-0.01  
0.01  
-0.01  
0.00  
0.04  
0.00  
0.01  
-0.01  
-0.02  
0.01  
-0.03  
0.01  
-0.02  
-0.01  
-0.01  
0.01  
0.00  
0.00  
0.02  
0.02  
0.03

0.03  
0.01  
0.00  
-0.02  
0.02  
-0.01  
0.00  
-0.02  
0.01  
0.00  
0.01  
0.02  
0.02  
0.00  
-0.02  
0.00  
0.01  
-0.02  
0.00  
0.01  
0.00  
-0.01  
-0.02  
0.02  
0.00  
-0.01  
0.00  
0.02  
-0.03  
-0.01  
0.00  
-0.01  
-0.01  
-0.01  
-0.01  
0.00  
0.02  
-0.01  
0.00  
-0.03  
0.00



0.00  
-0.02  
0.00  
-0.02  
0.01  
0.01  
0.00  
-0.01  
0.01  
0.01  
-0.01  
-0.02  
0.01  
0.00  
0.01  
0.01  
0.01  
0.02  
-0.01  
0.00  
0.00  
-0.02  
0.02  
0.01  
0.02  
-0.04  
-0.01  
-0.03  
0.01  
0.01  
-0.02  
-0.01  
-0.02  
0.00  
0.02  
-0.01  
0.00  
0.00  
-0.01  
0.00  
0.02

-0.02  
-0.01  
0.02  
0.00  
0.02  
-0.03  
0.01  
-0.01  
0.00  
-0.01  
0.00  
0.01  
0.00  
0.00  
0.00  
0.00  
-0.02  
-0.01  
0.00  
0.03  
-0.02  
0.02  
0.00  
0.01  
0.00  
0.00  
0.00  
-0.03  
0.01  
0.01  
-0.02  
-0.02  
0.01  
-0.02  
0.02  
-0.01  
0.00  
0.01  
0.03  
-0.01  
0.02

-0.02  
-0.01  
0.03  
-0.01  
-0.02  
0.01  
0.00  
0.00  
0.00  
-0.02  
0.00  
0.02  
0.01  
-0.01  
-0.01  
0.00  
-0.01  
0.00  
0.00  
0.01  
-0.01  
0.02  
0.01  
0.02  
0.00  
0.00  
0.00  
0.01  
0.00  
0.02  
0.00  
-0.02  
0.02  
0.00  
0.02  
-0.02  
-0.02  
0.00  
0.02  
0.00  
0.00

-0.02  
-0.01  
0.03  
-0.01  
0.01  
-0.03  
0.01  
0.00  
-0.01  
0.00  
0.02  
0.01  
0.01  
-0.01  
0.01  
0.00  
-0.02  
0.00  
-0.01  
0.01  
0.01  
0.02  
-0.01  
0.01  
-0.01  
-0.02  
0.00  
-0.02  
0.01  
-0.01  
-0.01  
0.00  
-0.01  
-0.01  
0.02  
0.01  
0.00  
-0.01  
0.00  
0.00  
0.00

0.01  
0.00  
-0.02  
-0.02  
0.03  
-0.01  
-0.01  
0.00  
0.02  
0.00  
-0.01  
0.01  
-0.01  
0.01  
0.01  
-0.02  
-0.01  
0.00  
-0.03  
-0.01  
0.01  
-0.02  
0.01  
-0.01  
0.02  
0.01  
-0.01  
-0.02  
0.00  
-0.01  
0.00  
-0.01  
0.01  
0.01  
0.00  
0.01  
-0.01  
0.02  
-0.01  
0.00  
0.02

-0.01  
0.01  
-0.01  
0.01  
0.00  
0.00  
0.00  
-0.01  
0.02  
0.01  
0.00  
0.01  
0.00  
-0.01  
0.01  
-0.01  
0.00  
0.01  
-0.01  
0.01  
-0.01  
0.00  
-0.01  
0.00  
0.00  
0.00  
-0.01  
0.02  
0.01  
0.00  
0.00  
-0.04  
0.00  
0.00  
0.01  
0.02  
0.00  
0.00  
0.01  
-0.01  
0.03

0.00  
0.00  
0.00  
0.01  
0.00  
-0.02  
0.00  
0.01  
-0.01  
-0.01  
-0.01  
-0.02  
0.01  
0.00  
-0.02  
0.01  
0.00  
0.01  
0.01  
0.00  
0.01  
0.00  
-0.01  
0.01  
-0.01  
-0.01  
-0.01  
-0.01  
-0.01  
-0.01  
0.02  
-0.01  
-0.02  
0.02  
-0.02  
0.01  
-0.03  
0.01  
0.00  
-0.01  
0.01  
-0.02

0.01  
0.01  
0.01  
0.01  
-0.01  
-0.01  
0.01  
-0.02  
0.02  
-0.01  
0.00  
0.00  
-0.01  
-0.01  
0.00  
0.00  
0.00  
0.02  
0.05  
-0.01  
0.00  
-0.01  
-0.01  
-0.01  
-0.02  
0.01  
-0.02  
-0.01  
0.01  
-0.01  
-0.01  
0.01  
-0.02  
0.00  
0.00  
0.00  
0.02  
-0.01  
0.00  
0.01  
0.01



0.00  
0.00  
0.04  
0.01  
0.00  
-0.01  
-0.01  
-0.01  
0.00  
0.01  
-0.01  
0.00  
-0.02  
-0.02  
0.01  
-0.02  
0.00  
-0.02  
0.01  
-0.02  
0.03  
-0.01  
-0.02  
-0.01  
0.00  
0.00  
-0.01  
0.00  
0.00  
0.01  
-0.01  
0.01  
0.01  
-0.01  
0.01  
0.01  
-0.03  
-0.01  
0.02  
-0.03  
0.01

0.00  
0.01  
0.01  
0.02  
0.02  
0.01  
0.01  
0.02  
0.00  
0.02  
0.00  
-0.01  
-0.01  
0.00  
-0.01  
0.00  
0.00  
-0.03  
0.00  
-0.02  
0.00  
0.00  
-0.01  
-0.01  
-0.02  
-0.02  
0.00  
-0.01  
0.00  
0.03  
-0.01  
0.01  
-0.01  
0.01  
-0.02  
0.00  
0.02  
0.00  
0.00  
0.02  
0.01

-0.01  
0.00  
0.01  
0.00  
0.01  
-0.01  
0.02  
0.01  
0.01  
-0.03  
-0.01  
0.01  
0.01  
-0.01  
0.01  
0.01  
0.00  
0.01  
0.01  
0.00  
0.01  
0.00  
0.00  
-0.01  
0.01  
0.04  
0.03  
-0.02  
0.02  
0.00  
0.01  
0.00  
0.00  
-0.01  
0.01  
0.01  
0.01  
0.01  
-0.01  
-0.02  
0.02

0.01  
-0.01  
-0.02  
0.00  
0.03  
0.00  
-0.01  
0.01  
-0.02  
0.00  
0.02  
0.03  
0.01  
-0.03  
0.01  
-0.01  
0.00  
0.00  
-0.02  
0.01  
-0.01  
0.00  
0.00  
0.00  
-0.03  
-0.01  
-0.01  
0.01  
0.02  
-0.01  
-0.02  
-0.01  
-0.01  
0.00  
-0.03  
0.01  
-0.02  
-0.01  
-0.02  
0.00  
-0.01

-0.01  
0.00  
0.00  
0.00  
0.00  
0.01  
0.01  
0.01  
0.01  
-0.01  
-0.01  
0.00  
0.02  
0.02  
0.00  
0.00  
0.01  
-0.01  
-0.01  
0.00  
0.01  
0.00  
0.00  
-0.03  
0.00  
-0.02  
-0.02  
0.00  
0.01  
-0.01  
-0.01  
0.00  
0.00  
0.00  
0.02  
-0.01  
0.03  
0.00  
0.01  
0.01  
-0.02

-0.01  
0.01  
0.00  
0.00  
-0.01  
0.00  
-0.01  
0.02  
-0.01  
0.00  
-0.01  
0.01  
-0.01  
0.01  
0.00  
-0.01  
0.00  
0.02  
0.00  
0.00  
-0.01  
0.00  
0.00  
-0.02  
0.01  
0.00  
-0.02  
-0.01  
0.02  
0.02  
0.01  
0.01  
0.01  
0.00  
0.01  
-0.02  
-0.01  
0.00  
0.00  
0.00  
-0.01

0.00  
-0.02  
0.00  
-0.02  
-0.02  
-0.01  
0.00  
-0.01  
0.00  
-0.01  
-0.02  
-0.02  
0.02  
0.00  
-0.01  
0.01  
0.03  
-0.02  
-0.01  
-0.01  
-0.02  
0.00  
0.00  
0.01  
0.00  
0.00  
-0.01  
-0.01  
0.02  
0.01  
0.00  
-0.04  
0.02  
-0.03  
0.00  
0.00  
0.00  
0.01  
0.01  
0.00  
0.00

0.02  
0.00  
-0.03  
-0.01  
0.00  
0.00  
-0.01  
0.00  
-0.01  
0.03  
0.01  
0.01  
-0.01  
-0.01  
-0.01  
0.02  
0.01  
-0.01  
0.00  
0.01  
-0.02  
0.02  
-0.02  
0.00  
-0.01  
0.00  
-0.01  
0.02  
-0.02  
0.00  
0.00  
0.00  
0.01  
0.03  
0.00  
-0.01  
0.01  
0.01  
-0.01  
0.01  
-0.01



0.01  
-0.01  
0.02  
0.00  
0.01  
0.00  
0.03  
0.00  
0.01  
-0.02  
0.03  
0.00  
0.01  
-0.01  
-0.01  
0.00  
-0.02  
-0.03  
-0.01  
-0.04  
0.00  
-0.01  
-0.03  
0.00  
0.00  
-0.03  
-0.01  
0.01  
0.02  
0.01  
0.00  
0.04  
0.01  
0.02  
0.00  
0.01  
0.00  
-0.02  
0.02  
0.02  
-0.02

0.00  
0.01  
-0.01  
0.03  
-0.01  
0.01  
0.00  
0.00  
-0.01  
-0.02  
0.01  
-0.02  
0.02  
-0.01  
0.00  
0.00  
0.01  
0.01  
0.02  
0.02  
-0.03  
0.01  
0.01  
0.01  
0.02  
0.00  
0.01  
-0.01  
0.01  
-0.01  
0.00  
0.00  
0.01  
0.01  
0.00  
-0.03  
0.00  
0.00  
-0.01  
-0.01  
0.01

0.00  
0.00  
0.01  
0.00  
0.02  
0.01  
-0.01  
-0.01  
-0.02  
0.01  
-0.01  
0.02  
0.00  
0.01  
-0.01  
0.02  
0.04  
0.01  
0.01  
0.00  
0.00  
-0.01  
0.01  
0.01  
0.00  
-0.01  
0.00  
-0.02  
-0.02  
0.01  
0.02  
0.02  
-0.02  
0.01  
-0.03  
0.00  
-0.01  
-0.01  
0.00  
-0.01  
-0.02

0.03  
-0.02  
0.00  
0.01  
0.00  
0.03  
0.01  
0.01  
0.00  
0.00  
-0.02  
0.00  
-0.02  
-0.01  
0.01  
0.00  
0.00  
0.00  
-0.01  
0.00  
0.00  
-0.02  
0.00  
-0.02  
-0.01  
-0.03  
0.00  
-0.01  
0.00  
0.00  
-0.02  
-0.01  
-0.03  
0.03  
0.01  
0.00  
-0.02  
-0.02  
0.02  
0.01  
0.01

0.01  
0.00  
0.00  
-0.02  
0.02  
0.00  
0.01  
0.03  
-0.01  
0.02  
0.00  
-0.02  
-0.03  
0.02  
0.01  
-0.02  
0.01  
-0.01  
0.01  
0.00  
0.03  
-0.01  
0.01  
-0.01  
-0.01  
-0.01  
0.00  
0.01  
0.01  
0.00  
0.00  
0.00  
-0.01  
0.00  
0.00  
0.00  
0.03  
0.00  
-0.03  
0.01  
0.01

-0.01  
0.00  
0.00  
-0.01  
0.00  
0.00  
-0.01  
-0.01  
0.00  
-0.01  
0.01  
-0.01  
0.00  
0.00  
0.00  
0.01  
0.01  
-0.01  
-0.01  
0.00  
0.00  
0.01  
-0.01  
0.00  
-0.03  
-0.02  
0.01  
-0.03  
0.01  
-0.02  
0.02  
-0.01  
-0.01  
0.01  
0.01  
-0.01  
-0.04  
-0.01  
0.02  
-0.01  
0.01

0.00  
-0.02  
0.01  
-0.02  
0.00  
0.00  
0.00  
-0.01  
0.00  
0.02  
0.00  
0.00  
-0.03  
0.01  
-0.01  
0.02  
-0.01  
0.01  
0.00  
-0.01  
0.03  
0.01  
0.00  
0.00  
0.00  
0.03  
0.00  
-0.01  
-0.02  
0.00  
-0.01  
0.00  
-0.02  
-0.01  
0.00  
0.01  
0.01  
0.01  
0.01  
0.01  
0.01  
0.01

0.00  
0.00  
0.02  
0.00  
-0.01  
-0.01  
0.00  
0.02  
-0.01  
0.01  
0.01  
0.00  
0.00  
0.00  
-0.02  
0.03  
0.00  
0.02  
-0.02  
0.01  
-0.02  
-0.02  
0.00  
0.00  
-0.01  
0.02  
-0.01  
0.02  
-0.02  
0.00  
0.00  
0.01  
-0.02  
0.01  
0.02  
-0.01  
0.00  
-0.02  
0.01  
-0.02  
0.01



0.01  
-0.02  
0.00  
0.02  
0.00  
-0.02  
0.00  
0.01  
0.01  
0.01  
0.00  
-0.01  
-0.01  
0.01  
0.02  
-0.01  
0.02  
0.00  
-0.02  
0.00  
0.01  
-0.01  
0.01  
0.00  
-0.01  
0.02  
0.00  
-0.01  
0.00  
0.01  
0.01  
0.02  
-0.01  
-0.01  
0.00  
-0.02  
-0.01  
-0.01  
0.00  
0.00  
0.01

0.03  
0.03  
0.00  
0.00  
0.01  
-0.01  
-0.04  
-0.02  
0.00  
0.01  
-0.01  
0.01  
-0.01  
0.03  
0.01  
-0.02  
0.00  
0.00  
-0.01  
-0.01  
0.02  
-0.02  
-0.01  
-0.01  
0.01  
-0.02  
0.00  
0.01  
0.00  
0.01  
-0.01  
-0.01  
0.00  
-0.01  
0.00  
0.00  
-0.02  
0.00  
0.01  
0.01  
0.00

-0.03  
-0.01  
0.01  
0.01  
0.00  
0.02  
-0.02  
-0.01  
-0.03  
0.02  
0.00  
-0.01  
-0.01  
-0.01  
-0.01  
0.00  
0.00  
0.01  
0.00  
-0.01  
-0.01  
0.01  
0.01  
0.01  
-0.03  
0.00  
-0.01  
-0.02  
0.00  
0.00  
-0.03  
-0.02  
0.00  
0.01  
-0.01  
0.00  
0.01  
0.00  
0.01  
0.01  
0.03  
0.01

0.02  
0.00  
0.00  
0.02  
-0.02  
-0.01  
-0.01  
-0.02  
0.01  
0.01  
-0.01  
-0.01  
0.02  
0.01  
-0.02  
0.00  
0.00  
0.01  
0.02  
0.00  
-0.02  
0.00  
0.02  
-0.01  
-0.01  
-0.01  
0.02  
0.02  
-0.01  
0.01  
-0.01  
-0.02  
0.01  
-0.01  
0.01  
-0.02  
0.01  
0.01  
0.00  
0.00  
0.01

-0.01  
-0.02  
0.01  
0.00  
-0.02  
0.00  
-0.01  
0.02  
-0.01  
0.00  
0.01  
0.00  
0.02  
0.00  
0.02  
-0.02  
0.00  
-0.01  
0.01  
0.00  
0.00  
-0.01  
0.00  
-0.02  
0.01  
0.00  
0.01  
0.00  
0.00  
0.01  
0.00  
0.01  
-0.02  
0.00  
-0.02  
0.00  
0.00  
-0.02  
0.02  
-0.02  
0.01

0.01  
0.00  
0.02  
-0.02  
0.02  
-0.04  
0.00  
0.00  
0.00  
0.00  
0.00  
-0.01  
-0.01  
-0.01  
0.00  
0.00  
-0.01  
0.02  
-0.02  
0.00  
0.00  
0.00  
-0.03  
0.00  
0.00  
-0.03  
-0.01  
0.01  
0.01  
0.00  
-0.01  
-0.01  
0.01  
0.01  
-0.01  
-0.02  
0.01  
0.01  
0.00  
0.02  
-0.01

0.00  
-0.01  
-0.02  
-0.02  
0.00  
-0.02  
0.02  
0.01  
0.02  
0.00  
0.01  
-0.02  
-0.01  
0.02  
-0.02  
0.00  
0.00  
0.01  
-0.02  
-0.01  
0.00  
0.02  
-0.02  
-0.01  
0.00  
-0.01  
0.03  
-0.01  
0.00  
-0.01  
0.00  
0.02  
0.02  
0.00  
-0.02  
0.00  
-0.01  
-0.02  
0.00  
0.00  
-0.02

-0.01  
-0.01  
0.00  
-0.03  
-0.03  
-0.01  
-0.02  
-0.01  
-0.01  
0.02  
0.04  
-0.02  
-0.01  
0.00  
-0.02  
-0.01  
0.01  
-0.01  
0.01  
0.03  
0.00  
0.01  
0.00  
0.00  
0.00  
0.00  
0.00  
0.00  
0.00  
0.00  
0.00  
0.01  
0.00  
0.01  
0.01  
0.02  
0.01  
0.01  
0.01  
0.01  
0.01  
0.00  
0.00  
0.02



-0.01  
0.01  
0.00  
0.00  
-0.01  
-0.01  
-0.01  
-0.01  
0.01  
-0.02  
0.01  
0.01  
0.00  
-0.02  
-0.02  
-0.03  
0.02  
-0.01  
0.02  
-0.01  
-0.01  
0.01  
0.03  
-0.02  
0.01  
0.00  
0.00  
0.00  
-0.01  
0.01  
-0.01  
-0.03  
0.01  
0.01  
-0.01  
0.00  
0.02  
0.00  
0.01  
-0.01  
-0.02

-0.02  
0.00  
-0.03  
-0.01  
0.03  
0.01  
0.03  
0.02  
-0.03  
-0.03  
-0.01  
0.02  
0.01  
0.01  
-0.01  
0.01  
-0.02  
0.03  
0.00  
0.01  
0.00  
-0.01  
-0.01  
-0.01  
0.01  
-0.02  
-0.04  
-0.02  
0.02  
0.01  
-0.01  
-0.01  
-0.02  
-0.01  
0.01  
-0.02  
-0.01  
0.00  
0.00  
-0.01  
0.01

0.01  
0.00  
-0.01  
0.00  
0.00  
0.00  
0.02  
-0.02  
0.01  
0.00  
0.00  
-0.02  
-0.01  
-0.02  
-0.01  
0.00  
0.00  
0.03  
0.00  
0.01  
0.00  
0.01  
0.02  
0.00  
-0.01  
-0.01  
0.01  
0.02  
0.00  
-0.02  
0.01  
-0.01  
0.01  
0.01  
0.01  
0.01  
0.01  
-0.02  
-0.03  
0.00  
-0.01  
0.00

-0.01  
0.01  
0.00  
0.01  
0.00  
0.01  
0.01  
0.01  
0.00  
0.01  
0.01  
-0.01  
0.00  
-0.01  
0.00  
0.00  
0.01  
0.00  
0.03  
-0.01  
0.03  
0.02  
-0.01  
0.01  
0.00  
-0.02  
0.00  
0.00  
-0.01  
-0.03  
-0.03  
0.00  
-0.02  
0.00  
-0.02  
-0.03  
-0.01  
0.01  
0.00  
0.00  
-0.01

0.00  
-0.01  
0.00  
0.02  
0.01  
-0.03  
0.01  
0.00  
-0.02  
0.00  
-0.01  
-0.01  
-0.01  
0.01  
0.00  
0.00  
0.00  
-0.01  
-0.01  
-0.01  
-0.01  
0.00  
-0.03  
-0.01  
0.01  
0.00  
-0.01  
-0.01  
-0.01  
0.01  
-0.01  
0.00  
-0.01  
-0.04  
-0.03  
0.01  
-0.03  
0.00  
-0.01  
-0.01  
0.03

0.02  
-0.01  
0.00  
-0.01  
0.01  
0.01  
-0.01  
0.01  
-0.02  
0.01  
0.01  
0.01  
-0.02  
0.00  
0.01  
0.03  
0.02  
0.02  
0.00  
-0.01  
0.00  
0.01  
0.00  
0.00  
0.00  
-0.02  
0.00  
0.00  
0.01  
-0.01  
-0.01  
-0.01  
0.01  
0.00  
0.02  
0.00  
-0.02  
-0.01  
0.02  
-0.02  
-0.02

-0.02  
-0.01  
0.02  
-0.01  
0.02  
0.02  
0.02  
0.00  
0.00  
-0.01  
-0.02  
0.00  
0.02  
0.00  
0.01  
-0.02  
0.00  
0.00  
0.01  
0.00  
0.00  
0.02  
-0.01  
-0.02  
0.00  
0.00  
0.01  
0.02  
0.02  
0.00  
0.00  
-0.01  
0.02  
0.00  
0.00  
0.01  
0.01  
-0.02  
0.01  
0.00  
-0.01

0.01  
0.02  
0.00  
0.00  
0.01  
0.00  
-0.01  
-0.01  
0.00  
-0.02  
-0.01  
0.00  
0.00  
0.02  
-0.01  
0.02  
0.00  
0.00  
0.01  
0.00  
0.01  
0.00  
0.00  
0.00  
0.00  
0.00  
0.00  
-0.02  
0.01  
0.02  
0.00  
0.00  
-0.01  
-0.01  
-0.01  
0.00  
-0.02  
0.00  
0.02  
-0.02  
0.00  
0.02



-0.01  
-0.01  
-0.01  
-0.01  
-0.01  
0.00  
0.00  
-0.01  
-0.01  
-0.01  
-0.01  
0.02  
0.00  
-0.02  
-0.02  
0.00  
0.02  
0.03  
0.01  
0.00  
0.01  
-0.01  
-0.01  
-0.02  
-0.01  
-0.01  
0.00  
0.00  
0.00  
-0.01  
0.00  
0.00  
0.01  
0.00  
0.02  
0.00  
-0.03  
0.01  
-0.02  
0.01  
-0.01

0.01  
0.00  
-0.01  
0.00  
-0.01  
0.01  
-0.01  
-0.01  
0.00  
0.00  
-0.02  
-0.02  
0.01  
0.01  
0.02  
0.01  
-0.01  
-0.03  
-0.02  
-0.01  
0.01  
-0.01  
-0.01  
-0.02  
0.00  
0.00  
0.01  
0.01  
0.02  
-0.01  
0.01  
0.00  
-0.01  
0.02  
0.00  
-0.02  
0.01  
0.00  
0.00  
-0.01  
-0.02

0.00  
-0.02  
-0.02  
0.03  
-0.01  
-0.01  
-0.01  
0.02  
0.00  
0.00  
-0.01  
0.02  
0.01  
0.02  
0.03  
-0.01  
0.02  
0.00  
0.00  
0.00  
-0.01  
0.03  
0.00  
0.00  
-0.01  
-0.03  
0.00  
-0.01  
0.01  
-0.01  
0.00  
-0.03  
0.03  
-0.01  
0.01  
0.01  
0.01  
0.01  
0.01  
0.01  
0.01  
0.02

-0.01  
0.00  
0.01  
-0.01  
-0.01  
-0.01  
-0.01  
0.04  
-0.01  
-0.01  
-0.01  
0.00  
0.00  
0.02  
0.02  
-0.01  
-0.01  
0.01  
0.00  
0.01  
0.01  
0.01  
0.01  
0.01  
-0.01  
0.00  
-0.01  
-0.01  
0.00  
0.00  
0.00  
0.01  
0.00  
-0.01  
0.02  
0.01  
0.00  
0.00  
0.00  
-0.02  
0.00  
-0.01

0.01  
-0.01  
0.01  
0.00  
0.00  
-0.01  
0.00  
-0.01  
0.01  
0.00  
0.00  
0.01  
0.01  
-0.01  
0.03  
0.01  
0.00  
-0.02  
0.01  
0.00  
0.01  
-0.01  
0.02  
0.01  
0.01  
0.01  
-0.01  
-0.01  
-0.01  
0.00  
-0.02  
0.01  
0.01  
0.00  
-0.01  
0.00  
0.01  
0.01  
-0.01  
-0.02  
0.01

0.01  
-0.02  
0.00  
0.01  
0.00  
-0.01  
-0.01  
0.00  
0.00  
-0.01  
0.01  
-0.01  
0.00  
-0.01  
0.00  
0.01  
-0.02  
-0.01  
0.01  
-0.01  
-0.01  
-0.01  
0.00  
0.00  
-0.02  
0.00  
0.03  
0.00  
0.01  
0.00  
0.00  
0.01  
0.00  
-0.02  
0.00  
0.00  
0.00  
-0.01  
0.02  
-0.01  
-0.01

0.02  
-0.01  
0.00  
0.00  
0.02  
-0.02  
0.01  
0.00  
0.00  
-0.02  
-0.01  
-0.02  
-0.01  
0.03  
0.00  
0.02  
0.01  
0.00  
0.00  
-0.04  
0.00  
0.02  
0.02  
0.00  
0.00  
-0.02  
0.00  
-0.01  
0.03  
0.00  
-0.01  
0.00  
0.00  
0.00  
-0.01  
0.00  
-0.02  
0.00  
0.00  
0.01  
0.01

-0.01  
0.01  
-0.02  
-0.02  
0.02  
0.00  
-0.01  
0.00  
-0.01  
0.01  
0.00  
-0.01  
0.00  
0.00  
0.02  
-0.02  
0.01  
-0.02  
0.02  
0.03  
-0.02  
0.00  
-0.02  
0.00  
0.02  
-0.01  
0.01  
-0.02  
0.00  
0.00  
0.01  
0.00  
0.02  
-0.01  
0.01  
0.00  
-0.02  
-0.01  
0.01  
-0.01  
0.02



0.02  
-0.01  
0.00  
0.01  
-0.01  
0.00  
0.00  
0.01  
0.00  
-0.01  
-0.02  
0.01  
0.02  
0.00  
0.01  
0.00  
0.01  
-0.01  
0.00  
-0.02  
-0.01  
0.01  
0.00  
0.05  
0.01  
0.01  
0.00  
0.00  
-0.01  
0.02  
0.01  
0.00  
0.00  
0.00  
0.02  
0.01  
0.02  
0.00  
0.00  
0.00  
-0.01

-0.01  
0.01  
0.02  
0.00  
0.02  
-0.02  
0.00  
-0.02  
0.02  
0.01  
0.02  
0.01  
0.01  
-0.02  
0.00  
0.01  
0.03  
-0.01  
0.03  
-0.01  
0.02  
0.02  
0.00  
0.01  
0.01  
0.01  
0.01  
0.00  
-0.01  
0.00  
-0.01  
-0.01  
0.01  
0.01  
0.00  
0.00  
0.01  
0.02  
0.02  
0.01  
0.01

-0.02  
0.03  
0.01  
0.01  
0.00  
0.00  
0.01  
0.00  
-0.01  
-0.01  
0.00  
0.04  
0.01  
0.00  
0.01  
0.01  
-0.02  
0.00  
0.00  
0.00  
0.00  
0.00  
0.01  
0.04  
0.00  
0.01  
0.01  
0.01  
0.00  
-0.01  
-0.01  
0.01  
-0.01  
0.02  
0.03  
-0.01  
0.01  
0.00  
-0.02  
0.01  
0.00

0.00  
0.02  
0.01  
0.01  
-0.01  
-0.01  
0.02  
0.00  
-0.01  
0.00  
0.00  
0.02  
0.02  
0.01  
0.00  
0.02  
-0.03  
0.02  
0.01  
0.01  
-0.02  
0.00  
0.00  
-0.01  
0.00  
0.00  
-0.01  
0.01  
0.00  
0.00  
-0.02  
0.04  
-0.01  
-0.01  
-0.02  
0.01  
0.01  
-0.02  
0.01  
0.00  
0.00

0.00  
0.02  
0.00  
0.00  
0.00  
0.01  
0.00  
0.01  
-0.01  
-0.01  
-0.01  
0.02  
0.00  
-0.01  
0.00  
0.01  
-0.02  
-0.01  
0.01  
0.00  
0.03  
0.01  
0.02  
-0.02  
-0.03  
-0.01  
-0.02  
0.01  
0.00  
0.02  
0.02  
-0.01  
0.02  
-0.01  
0.00  
0.02  
0.01  
-0.02  
0.02  
0.00  
-0.01

-0.02  
0.00  
-0.01  
0.04  
-0.01  
0.01  
0.00  
0.00  
0.00  
0.00  
0.02  
0.00  
-0.01  
0.01  
0.02  
0.01  
0.00  
-0.02  
0.00  
-0.01  
-0.01  
-0.01  
-0.02  
-0.01  
0.00  
0.01  
0.00  
0.02  
0.01  
0.00  
0.00  
0.01  
-0.01  
-0.01  
0.00  
0.02  
-0.01  
0.00  
-0.01  
-0.01  
-0.01

0.02  
-0.01  
0.02  
-0.02  
-0.01  
0.01  
-0.04  
0.01  
0.03  
-0.02  
0.01  
0.02  
0.01  
-0.03  
0.02  
-0.01  
0.00  
0.01  
0.00  
-0.01  
0.03  
-0.01  
-0.01  
-0.01  
0.00  
0.01  
0.02  
-0.02  
0.02  
-0.01  
0.00  
0.01  
-0.01  
0.03  
0.00  
0.00  
0.00  
0.00  
0.00  
-0.04  
-0.02  
0.00

-0.01  
0.00  
-0.01  
0.02  
0.01  
0.04  
-0.01  
0.01









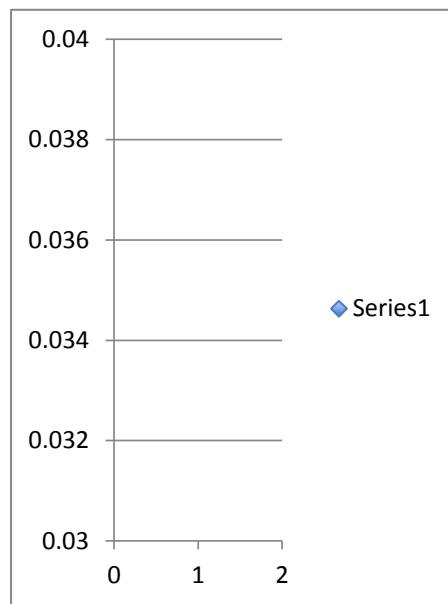

Supplement: c2ja30215b.pdf [file c2ja30215b.pdf]
